# Supplementary material for: The total synthesis of D-chalcose and its C-3 epimer
Source: publisher site journal article supplement (doi:10.3762/bjoc.9.296), 2013-11-22
Supplement: Additional file 1 [file 1860-5397-9-296-S1.pdf]

**Supporting Information**  
**for**  
**The total synthesis of D-chalcoside and its C-3 epimer**

Jun Sun<sup>1</sup>, Song Fan<sup>1</sup>, Zhan Wang<sup>1</sup>, Guoning Zhang<sup>1</sup>, Kai Bao<sup>\*2</sup>, Weige Zhang<sup>\*1</sup>

Address: <sup>1</sup>Key Laboratory of Structure-Based Drug Design & Discovery, Ministry of Education, Shenyang Pharmaceutical University, Shenyang 110016, China and

<sup>2</sup>Center for Molecular Imaging, Beth Israel Deaconess Medical Center, Harvard Medical School, Boston, MA 02215, United States

Email: Weige Zhang\* - zhangweige2000@sina.com;

Kai Bao\* - kbao@bidmc.harvard.edu

\* Corresponding author

**Experimental details, characterization data of all products, and  
copies of MS and NMR spectra**

**Table of contents**

|                                                 |     |
|-------------------------------------------------|-----|
| Experimental details.....                       | S2  |
| References.....                                 | S13 |
| Copies of MS of isolated products.....          | S14 |
| Copies of NMR spectra of isolated products..... | S32 |

## Experimental details

**General methods:** Commercial reagents were used without further purification unless specialized. Solvents were dried and redistilled prior to use in the usual way. Boiling range of petroleum ether was 60–90 °C. Thin-layer chromatography was performed on GF254 silica gel plates to monitor the reaction and the plates were examined under UV light or detected with a solution of aniline: diphenylamine: phosphoric acid = 1 mL: 1 g: 5 mL in acetone (50 mL). The purification of the products was performed using column chromatography (60 Å, 200–300 mesh, Qingdao Ocean Chemicals) with the designated solvents. Preparative column chromatography was performed with silica gel H. Melting points were detected on a hot-stage microscope (X-4, Beijing Taiké Ltd). Optical rotations were measured at the sodium D-line at room temperature with a Jasco P-2000 polarimeter. <sup>1</sup>H and <sup>13</sup>C NMR spectra were taken in CDCl<sub>3</sub> solution on Bruker ARX-300, Bruker AV-400, and Bruker AV-600 spectrometers with TMS as the internal reference. Chemical shifts were reported in ppm downfield from tetramethylsilane and proton–proton coupling constants (J) in Hz. ESI-MS and EI-MS were obtained on an Agilent 1100 and an Agilent 6890N mass spectrometer, respectively. High-resolution mass spectra were detected on Bruker Daltonics micrOTOF-Q mass spectrometer.

### Ethyl (*R*)-3-(*tert*-butyldiphenylsilyloxy)butyrate (**2**) [1]

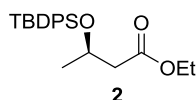

To a solution of ethyl (*R*)-3-hydroxybutyrate (**1**, 1.0 g, 7.6 mmol), imidazole (1.0 g, 14.7 mmol) and DMAP (0.09 g, 0.76 mmol) in 50 mL of dry CH<sub>2</sub>Cl<sub>2</sub> was added dropwise *tert*-butyldiphenylsilyl chloride (TBDPSCl, 2.5 g, 9.1 mmol) at 0 °C. After being stirred overnight at room temperature, the mixture was diluted with CH<sub>2</sub>Cl<sub>2</sub>, washed with brine, and dried over anhydrous Na<sub>2</sub>SO<sub>4</sub>. The solvents were then removed under reduced pressure, and the residue was purified by flash silica gel column chromatography (hexanes/ethyl acetate, 8:1) to provide **2** as a colorless oil (2.78 g, 99%). [ $\alpha$ ]<sub>D</sub><sup>25</sup> = -7.0° (*c* 1.0, CHCl<sub>3</sub>); <sup>1</sup>H-NMR (300 MHz, CDCl<sub>3</sub>)  $\delta$  7.70 (m,

4 H), 7.41 (m, 6 H), 4.33 (m, 1 H), 4.07 (m, 2 H), 2.57 (dd,  $J = 14.7, 6.9$  Hz, 1 H), 2.41 (dd,  $J = 14.7, 5.7$  Hz, 1 H), 1.22 (t,  $J = 7.2$  Hz, 3 H), 1.13 (d,  $J = 6.1$  Hz, 3 H), 1.05 (s, 9 H);  $^{13}\text{C}$ -NMR (300 MHz,  $\text{CDCl}_3$ )  $\delta$  171.7, 136.1, 134.6, 134.2, 129.9, 129.8, 127.7, 127.6, 67.2, 60.6, 44.9, 27.1, 23.9, 19.5, 14.4; MS (ESI,  $m/z$ ): 393.2  $[\text{M} + \text{Na}^+]$

**(3R)-3-(*tert*-Butyldiphenylsilyloxy)butyraldehyde (3) [2]**

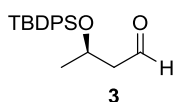

To a solution of **2** (2.0 g, 5.4 mmol) in 50 mL of anhydrous  $\text{CH}_2\text{Cl}_2$  was added dropwise DIBAL-H (6.5 mL, 1.0 M solution in toluene) at  $-78^\circ\text{C}$ . After 2 h, the mixture was raised to  $-30^\circ\text{C}$ , methanol (5 mL) was then added, the cooling bath removed, and the mixture warmed to  $0^\circ\text{C}$ . A saturated solution of potassium sodium tartrate was added and the mixture was extracted with  $\text{Et}_2\text{O}$  (3  $\times$  15 mL). The combined organic layers were washed with brine, dried (anhydrous  $\text{Na}_2\text{SO}_4$ ), filtered and concentrated. The residue was purified by flash silica gel column chromatography (hexanes/ethyl acetate, 5:1) to afford aldehyde **3** as a colorless oil (1.64 g, 93%).  $[\alpha]_D^{25} = +8.3^\circ$  ( $c$  1.0,  $\text{CHCl}_3$ );  $^1\text{H}$ -NMR (300 MHz,  $\text{CDCl}_3$ )  $\delta$  9.75(s, 1 H), 7.67 (m, 4 H), 7.40 (m, 6 H), 4.35 (m, 1 H), 2.51 (m, 2 H), 1.19 (d,  $J = 6.2$  Hz, 3 H), 1.06 (s, 9 H);  $^{13}\text{C}$ -NMR (300 MHz,  $\text{CDCl}_3$ )  $\delta$  201.9, 135.8, 134.0, 133.5, 129.8, 129.7, 127.7, 127.5, 65.6, 52.7, 26.9, 23.8, 19.1; MS (EI,  $m/z$ ): 325.2  $[\text{M} - \text{H}^+]$ .

**(3S,5R)-5-(*tert*-Butyldiphenylsilyloxy)hex-1-en-3-ol (4) [3]**

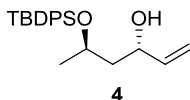

To freshly dried CuI (11.6 mg, 0.06 mmol) under  $\text{N}_2$  was added 10 mL dry diethyl ether and 1.22 mL of 1.0 M vinylmagnesium bromide in THF (1.22 mmol). The mixture was stirred at  $-78^\circ\text{C}$  for 30 min. At this point, a solution of **3** (200 mg, 0.61 mmol) in dry diethyl ether (10 mL) was introduced dropwise, then the mixture was

stirred at  $-78\text{ }^{\circ}\text{C}$  for 3 h and allowed to warm to  $0\text{ }^{\circ}\text{C}$  quenching with water (1.2 mL) and extraction with diethyl ether ( $3 \times 15\text{ mL}$ ). The combined organic layers were washed with brine, and dried over anhydrous  $\text{Na}_2\text{SO}_4$ . The solvents were then removed under reduced pressure, and the residue was purified by flash silica gel column chromatography (hexanes/ethyl acetate, 7:1) to provide **4** as a colorless oil (184 mg, 85%).  $[\alpha]_{\text{D}}^{25} = +4.8^{\circ}$  ( $c\text{ }1.4$ ,  $\text{CHCl}_3$ );  $^1\text{H-NMR}$  (300 MHz,  $\text{CDCl}_3$ )  $\delta$  7.70 (m, 4 H), 7.41 (m, 6 H), 5.82 (dd,  $J = 17.2, 10.5\text{ Hz}$ , 1 H), 5.24 (d,  $J = 17.2\text{ Hz}$ , 1 H), 5.06 (d,  $J = 10.5\text{ Hz}$ , 1 H), 4.46 (m, 1 H), 4.17 (m, 1 H), 3.06 (s, 1 H), 1.66 (m, 2 H), 1.11 (d,  $J = 6.2\text{ Hz}$ , 3 H), 1.06 (s, 9 H);  $^{13}\text{C-NMR}$  (300 MHz,  $\text{CDCl}_3$ )  $\delta$  141.3, 136.2, 134.2, 130.1, 130.0, 128.0, 127.9, 114.3, 69.9, 68.7, 45.0, 27.3, 23.0, 19.4; MS (ESI,  $m/z$ ): 377.1  $[\text{M} + \text{Na}^+]$ .

**(3*R*,5*R*)-5-(*tert*-Butyldiphenylsilyloxy)hex-1-en-3-ol (**4'**) [3]**

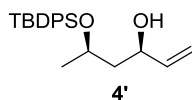

The same reaction condition was followed to obtain the required product **4'** in 85% as a colourless oil.  $[\alpha]_{\text{D}}^{25} = -7.0^{\circ}$  ( $c\text{ }1.3$ ,  $\text{CHCl}_3$ );  $^1\text{H-NMR}$  (300 MHz,  $\text{CDCl}_3$ )  $\delta$  7.70 (m, 4 H), 7.41 (m, 6 H), 5.80 (dd,  $J = 17.2, 10.5\text{ Hz}$ , 1 H), 5.20 (d,  $J = 17.2\text{ Hz}$ , 1 H), 5.05 (d,  $J = 10.5\text{ Hz}$ , 1 H), 4.34 (m, 1 H), 4.12 (m, 1 H), 2.85 (s, 1 H), 1.68 (m, 2 H), 1.06 (s, 9 H), 1.01 (d,  $J = 6.2\text{ Hz}$ , 3 H);  $^{13}\text{C-NMR}$  (300 MHz,  $\text{CDCl}_3$ )  $\delta$  141.3, 136.2, 134.6, 133.8, 130.1, 129.9, 128.0, 127.8, 114.5, 71.9, 70.2, 46.5, 27.2, 24.3, 19.5; MS (ESI,  $m/z$ ): 377.1  $[\text{M} + \text{Na}^+]$ .

Diisopropyl azodicarboxylate (DIAD, 430 mg, 2.13 mmol) was added dropwise to a solution of compound **4'** (200 mg, 0.56 mmol), triphenylphosphine (440 mg, 1.68 mmol) and benzoic acid (239 mg, 1.96 mmol) in dry THF (2 mL) at room temperature. The resulting mixture was stirred for 8 h. Then 1 N HCl (0.1 mL) was added and the mixture was extracted with  $\text{Et}_2\text{O}$  ( $3 \times 20\text{ mL}$ ). The combined organic layers were washed with brine, dried (anhydrous  $\text{Na}_2\text{SO}_4$ ), filtered and concentrated. The residue was purified by flash silica gel column chromatography (hexanes/ethyl acetate, 15:1) to afford ester as a colorless oil, which was dissolved in THF (0.5 mL)

and cooled to 0 °C. To it was added 10% aqueous NaOH (1 mL), and the mixture was stirred at room temperature for 16 h, diluted with CHCl<sub>3</sub> (3 x 20 mL), washed with brine, and dried (anhydrous Na<sub>2</sub>SO<sub>4</sub>). Concentration in vacuo and purification of the residue by flash silica gel column chromatography (hexanes/ethyl acetate, 7:1) to afford **4** as a colourless oil (180 mg, 90%).

Diethyl diazenedicarboxylate (DEAD, 371 mg, 2.13 mmol) was added dropwise to a solution of compound **4** (200 mg, 0.56 mmol), triphenylphosphine (440 mg, 1.68 mmol) and benzoic acid (239 mg, 1.96 mmol) in dry THF (2 mL) at room temperature. The resulting mixture was stirred for 1 h and then the mixture was heated at 40 °C for 10 h. Then 1 N HCl (0.1 mL) was added and the mixture was extracted with Et<sub>2</sub>O (3 x 20 mL). The combined organic layers were washed with brine, dried (anhydrous Na<sub>2</sub>SO<sub>4</sub>), filtered and concentrated. The residue was purified by flash silica gel column chromatography (hexanes/ethyl acetate, 15:1) to afford the ester as a colorless oil, which was dissolved in THF (0.5 mL) and cooled to 0 °C. To it was added 10% aqueous NaOH (0.6 mL), and the mixture was stirred at room temperature for 20 h, diluted with CHCl<sub>3</sub> (3 x 20 mL), washed with brine, and dried (anhydrous Na<sub>2</sub>SO<sub>4</sub>). Concentration in vacuo and purification of the residue by flash silica gel column chromatography (hexanes/ethyl acetate, 7:1) to afford **4'** as a colorless oil (182 mg, 91%).

***tert*-butyl((2*R*,4*S*)-4-methoxyhex-5-en-2-yloxy)diphenylsilane (**5**) and**

***tert*-butyl((2*R*,4*R*)-4-methoxyhex-5-en-2-yloxy)diphenylsilane (**5'**)**

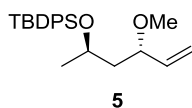

To a solution of **4** (200 mg, 0.56 mmol) in THF (2 mL) cooled to 0 °C under N<sub>2</sub> was add *t*-BuOK (1.13 mL, 1.13 mmol). The resulting mixture was stirred for 30 min, treated with freshly distilled methyl iodide (0.06 mL, 0.95 mmol) at 0 °C, allowed to warm slowly to room temperature overnight, quenched with water (5 mL), and extracted with EtOAc (3 x 10 mL). The combined organic layers were washed with brine, and dried over anhydrous Na<sub>2</sub>SO<sub>4</sub>. The solvents were then removed under

reduced pressure, and the residue was purified by flash silica gel column chromatography (hexanes/ethyl acetate, 15:1) to provide **5** as a colorless oil (198 mg, 96%).  $[\alpha]_D^{25} = -4.9^\circ$  ( $c$  0.69,  $\text{CHCl}_3$ );  $^1\text{H-NMR}$  (300 MHz,  $\text{CDCl}_3$ )  $\delta$  7.69 (m, 4 H), 7.38 (m, 6 H), 5.51 (m, 1 H), 5.12 (m, 1 H), 5.07 (m, 1 H), 4.08 (m, 1 H), 3.67 (m, 1 H), 3.08 (s, 3 H), 1.63 (m, 2 H), 1.06 (s, 9 H), 1.05 (d,  $J = 6.1$  Hz, 3 H);  $^{13}\text{C-NMR}$  (300 MHz,  $\text{CDCl}_3$ )  $\delta$  138.8, 135.9, 134.9, 134.4, 129.5, 129.4, 127.5, 127.4, 116.7, 79.6, 66.6, 55.8, 44.6, 27.1, 24.2, 19.3; HRMS  $m/z$ : calcd for  $[\text{C}_{23}\text{H}_{33}\text{O}_2\text{Si}]^+$  ( $[\text{M} + \text{H}]^+$ ) 369.2244, found: 369.2241.

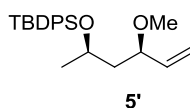

The same reaction conditions was followed to obtain the required product **5'** in 96% as a colorless oil.  $[\alpha]_D^{25} = +10.0^\circ$  ( $c$  0.75,  $\text{CHCl}_3$ );  $^1\text{H-NMR}$  (300 MHz,  $\text{CDCl}_3$ )  $\delta$  7.68 (m, 4 H), 7.37 (m, 6 H), 5.10 (m, 1 H), 5.03 (m, 1 H), 4.68 (m, 1 H), 3.97 (m, 1 H), 3.19 (s, 3 H), 1.93 (m, 1 H), 1.52 (m, 1 H), 1.08 (d,  $J = 6.1$  Hz, 3 H), 1.05 (s, 9 H).  $^{13}\text{C-NMR}$  (300 MHz,  $\text{CDCl}_3$ )  $\delta$  138.6, 135.9, 135.8, 134.8, 134.4, 129.5, 129.4, 127.5, 127.4, 117.1, 80.1, 67.0, 55.9, 45.1, 27.0, 23.7, 19.2; HRMS  $m/z$ : calcd for  $[\text{C}_{23}\text{H}_{32}\text{NaO}_2\text{Si}]^+$  ( $[\text{M} + \text{Na}]^+$ ) 391.2064, found: 391.2060.

**(2*S*,3*S*,5*R*)-5-(*tert*-butyldiphenylsilyloxy)-3-methoxyhexane-1,2-diol (**6**) and (2*S*,3*R*,5*R*)-5-(*tert*-butyldiphenylsilyloxy)-3-methoxyhexane-1,2-diol (**6'**)**

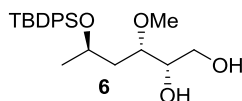

To a mixture of water (7.5 mL) and *tert*-butyl alcohol (7.5 mL) were added AD-mix- $\beta$  (2.03 g) and **5**, and the mixture was stirred at 0 °C for 72 h. The reaction was diluted with EtOAc, filtered, and extracted with EtOAc (3 x 10 mL). The combined organic layers were washed with brine, and dried over anhydrous  $\text{Na}_2\text{SO}_4$ . The solvents were then removed under reduced pressure, and the residue was purified by flash silica gel column chromatography (hexanes/ethyl acetate, 1:2) to provide **6** as a colorless oil (440 mg, 80%).  $[\alpha]_D^{25} = +1.5^\circ$  ( $c$  1.12,  $\text{CHCl}_3$ );  $^1\text{H-NMR}$  (300 MHz,  $\text{CDCl}_3$ )  $\delta$  7.69 (m, 4 H), 7.39 (m, 6 H), 4.02 (m, 1 H), 3.58 (m, 3 H),

3.40 (m, 1H), 3.22 (s, 3 H), 1.76 (m, 1 H), 1.60 (m, 1 H), 1.10 (d,  $J = 6.1$  Hz, 3 H), 1.05 (s, 9 H);  $^{13}\text{C}$ -NMR (300 MHz,  $\text{CDCl}_3$ )  $\delta$  135.9, 134.7, 134.6, 134.1, 129.7, 129.5, 127.6, 127.4, 80.2, 72.3, 67.3, 63.3, 58.4, 40.6, 27.0, 24.3, 19.2; HRMS  $m/z$  : calcd for  $[\text{C}_{23}\text{H}_{35}\text{O}_4\text{Si}]^+$  ( $[\text{M}+\text{H}]^+$ ) 403.2299, found: 403.2286.

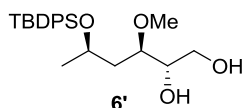

The same reaction conditions was followed to obtain the required product **6'** in 82% as a colorless oil.  $[\alpha]_{\text{D}}^{25} = -6.9^\circ$  ( $c$  1.17,  $\text{CHCl}_3$ );  $^1\text{H}$ -NMR (300 MHz,  $\text{CDCl}_3$ )  $\delta$  7.68 (m, 4 H), 7.40 (m, 6 H), 4.02 (m, 1 H), 3.62 (m, 2 H), 3.43 (m, 2 H), 3.29 (s, 3 H), 1.81 (m, 1 H), 1.61 (m, 1 H), 1.10 (d,  $J = 6.10$  Hz, 3 H), 1.05 (s, 9 H);  $^{13}\text{C}$ -NMR (300 MHz,  $\text{CDCl}_3$ )  $\delta$  135.9, 135.8, 134.3, 133.7, 129.8, 129.6, 127.7, 127.5, 80.2, 72.7, 67.3, 63.4, 57.7, 39.9, 27.0, 23.2, 19.1; HRMS  $m/z$  : calcd for  $[\text{C}_{23}\text{H}_{34}\text{NaO}_4\text{Si}]^+$  ( $[\text{M} + \text{Na}]^+$ ) 425.2119, found: 425.2121.

**(5R,7S,8S)-8-(tert-butyldimethylsilyloxy)-7-methoxy-2,2,5,11,11,12,12-heptamethyl-3,3-diphenyl-4,10-dioxo-3,11-disilatridecane (11) and (5R,7R,8S)-8-(tert-butyldimethylsilyloxy)-7-methoxy-2,2,5,11,11,12,12-heptamethyl-3,3-diphenyl-4,10-dioxo-3,11-disilatridecane (7')**

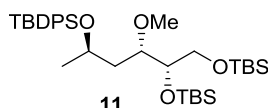

To a solution of **6** (200 mg, 0.5 mmol) in 2 mL of anhydrous  $\text{CH}_2\text{Cl}_2$  was added 2,6-lutidine (0.287 mL, 1.25 mmol) under  $\text{N}_2$ . The resulting solution was stirred at  $0^\circ\text{C}$  for 10 min. 2,6-Lutidine (0.175 mL, 1.5 mmol) was then added dropwise, the cooling bath removed, and the mixture warmed to room temperature for 24 h. Saturated aqueous ammonium chloride (5 mL) was added and the mixture was extracted with  $\text{CH}_2\text{Cl}_2$ . The combined organic layers were washed with brine, dried (anhydrous  $\text{Na}_2\text{SO}_4$ ), filtered and concentrated. The residue was purified by flash silica gel column chromatography (hexanes/ethyl acetate, 10:1) to afford compound **11** as a colorless oil (284 mg, 90%).  $[\alpha]_{\text{D}}^{25} = -10.1^\circ$  ( $c$  0.74,  $\text{CHCl}_3$ );  $^1\text{H}$ -NMR (300 MHz,  $\text{CDCl}_3$ )  $\delta$  7.71 (m, 4 H), 7.39 (m, 6 H), 4.11 (m, 1 H), 3.77 (m, 2 H), 3.54 (m,

2 H), 3.29 (s, 3 H), 1.68 (m, 2 H), 1.05 (s, 9 H), 1.02 (d,  $J = 6.02$  Hz, 3 H), 0.96 (s, 18 H), 0.07 (s, 12 H);  $^{13}\text{C}$ -NMR (300 MHz,  $\text{CDCl}_3$ )  $\delta$  135.9, 135.3, 134.3, 129.5, 129.3, 127.5, 127.3, 78.8, 74.8, 67.1, 64.3, 58.1, 41.2, 27.1, 26.0, 25.9, 19.3, 18.2, -4.2, -4.5, -4.8, -5.4; HRMS  $m/z$  : calcd for  $[\text{C}_{35}\text{H}_{62}\text{NaO}_4\text{Si}_3]^+$  ( $[\text{M} + \text{Na}]^+$ ) 653.3848, found: 653.3852.

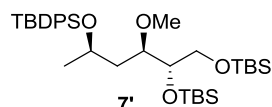

The same reaction conditions was followed to obtain the required product **7'** in 91% as a colorless oil.  $[\alpha]_{\text{D}}^{25} = +15.2^\circ$  ( $c$  0.64,  $\text{CHCl}_3$ );  $^1\text{H}$ -NMR (300 MHz,  $\text{CDCl}_3$ )  $\delta$  7.70 (m, 4 H), 7.39 (m, 6 H), 4.06(m, 1 H), 3.74(m, 2 H), 3.52 (m, 1 H), 3.34 (m, 1 H), 3.26 (s, 3 H), 1.72 (m, 2 H), 1.07 (s, 9 H), 0.91 (s, 18 H), 0.85 (d,  $J = 7.01$  Hz, 3 H), 0.07 (s, 12 H);  $^{13}\text{C}$ -NMR (300 MHz,  $\text{CDCl}_3$ )  $\delta$  135.9, 135.0, 134.6, 129.3, 127.4, 127.3, 79.7, 74.6, 67.6, 64.5, 57.4, 39.7, 27.1, 25.9, 22.9, 19.2, 18.3, 18.1, -4.5, -4.7, -5.3, -5.4; HRMS  $m/z$  : calcd for  $[\text{C}_{35}\text{H}_{62}\text{NaO}_4\text{Si}_3]^+$  ( $[\text{M} + \text{Na}]^+$ ) 653.3848, found: 653.3847.

**(2*S*,3*S*,5*R*)-2-(*tert*-butyldimethylsilyloxy)-5-(*tert*-butyldiphenylsilyloxy)-3-methoxyhexan-1-ol (12) and**  
**(2*S*,3*R*,5*R*)-2-(*tert*-butyldimethylsilyloxy)-5-(*tert*-butyldiphenylsilyloxy)-3-methoxyhexan-1-ol (8')**

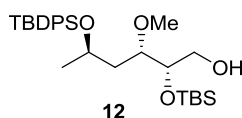

Compound **11** was dissolved in 5 mL methanol at 0 °C, added 23 mg CSA and stirred 1.5 h. Saturated aqueous sodium bicarbonate (2 mL) was added and the layers were separated. The aqueous layer was extracted with acetic ester (3 x 5 mL). The combined organic layers were washed with brine, dried (anhydrous  $\text{Na}_2\text{SO}_4$ ), filtered and concentrated. The residue was purified by flash silica gel column chromatography (hexanes/ethyl acetate, 5:1) to afford compound **12** as a colorless oil (146 mg, 59%).  $[\alpha]_{\text{D}}^{25} = -15.8^\circ$  ( $c$  0.66,  $\text{CHCl}_3$ );  $^1\text{H}$ -NMR (300 MHz,  $\text{CDCl}_3$ )  $\delta$  7.69 (m, 4 H), 7.38 (m, 6 H), 4.09 (m, 1 H), 3.63 (m, 2 H), 3.54 (m, 2 H), 3.28 (s, 3



H), 1.85 (m, 1 H), 1.44 (m, 1 H), 1.05 (s, 9 H), 1.02 (d,  $J = 6.1$  Hz, 3 H), 0.91 (s, 9 H), 0.11 (s, 6 H);  $^{13}\text{C}$ -NMR (300 MHz,  $\text{CDCl}_3$ )  $\delta$  135.9, 135.0, 134.2, 129.6, 129.4, 127.5, 127.3, 80.1, 70.5, 66.7, 58.1, 39.4, 27.1, 25.8, 24.7, 19.3, 18.1, -4.6, -4.7; HRMS  $m/z$  : calcd for  $[\text{C}_{29}\text{H}_{48}\text{NaO}_4\text{Si}_2]^+$  ( $[\text{M} + \text{Na}]^+$ ) 539.2983, found: 539.2983.

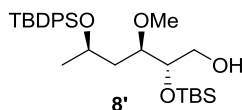

The same reaction conditions was followed to obtain the required product **8'** in 60% as a colorless oil.  $[\alpha]_D^{25} = -2.6^\circ$  ( $c$  0.46,  $\text{CHCl}_3$ );  $^1\text{H}$ -NMR (300 MHz,  $\text{CDCl}_3$ )  $\delta$  7.68 (m, 4 H), 7.39 (m, 6H), 4.06 (m, 1 H), 3.66 (m, 2 H), 3.50 (m, 2 H), 3.23 (s, 3 H), 1.67 (m, 1 H), 1.47 (m, 1 H), 1.06 (d,  $J = 6.2$  Hz, 3 H), 1.04 (s, 9 H), 0.90 (s, 9 H), 0.08 (s, 6 H);  $^{13}\text{C}$ -NMR (300 MHz,  $\text{CDCl}_3$ )  $\delta$  135.9, 135.8, 134.9, 134.2, 129.6, 129.4, 127.5, 127.4, 80.2, 74.5, 67.1, 63.9, 58.8, 42.3, 27.1, 25.8, 24.7, 19.3, 18.1, -4.5, -4.6; HRMS  $m/z$  : calcd for  $[\text{C}_{29}\text{H}_{48}\text{NaO}_4\text{Si}_2]^+$  ( $[\text{M} + \text{Na}]^+$ ) 539.2983, found: 539.2982.

**(2*R*,3*S*,5*R*)-2-(*tert*-butyldimethylsilyloxy)-5-(*tert*-butyldiphenylsilyloxy)-3-methoxyhexanal (**13**) and**

**(2*R*,3*R*,5*R*)-2-(*tert*-butyldimethylsilyloxy)-5-(*tert*-butyldiphenylsilyloxy)-3-methoxyhexanal (**9'**)**

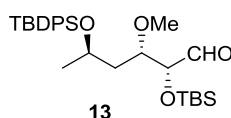

To a solution of **12** (100 mg, 0.19 mmol) in 7 mL of anhydrous  $\text{CH}_2\text{Cl}_2$  was added Dess–Martin periodinane (97 mg, 0.23 mmol) under  $\text{N}_2$  and the resulting solution was stirred at room temperature for 1 h. Saturated aqueous sodium bicarbonate (5 mL) was added followed by the addition of 7 mL of saturated aqueous  $\text{Na}_2\text{S}_2\text{O}_3$ . This solution was stirred at room temperature for 5 min,  $\text{CH}_2\text{Cl}_2$  was added and the layers were separated. The water layer was extracted with  $\text{CH}_2\text{Cl}_2$ . The combined organic layers were washed with brine, dried (anhydrous  $\text{Na}_2\text{SO}_4$ ), filtered and concentrated. The residue was purified by flash silica gel column chromatography (hexanes/ethyl acetate, 8:1) to afford compound **13** as a colorless oil (84 mg, 86%).

$[\alpha]_D^{25} = -2.4^\circ$  (*c* 0.54, CHCl<sub>3</sub>); <sup>1</sup>H-NMR (300 MHz, CDCl<sub>3</sub>)  $\delta$  9.67 (d, *J* = 1.42 Hz, 1 H), 7.68 (m, 4 H), 7.38 (m, 6 H), 4.10 (m, 2 H), 3.77 (m, 1 H), 3.26 (s, 3 H), 1.83 (m, 1 H), 1.46 (m, 1 H), 1.06 (s, 9 H), 1.03 (d, *J* = 6.24 Hz, 3 H), 0.94 (s, 9 H), 0.09 (s, 6 H); <sup>13</sup>C-NMR (300 MHz, CDCl<sub>3</sub>)  $\delta$  203.8, 136.3, 136.2, 135.3, 134.5, 130.0, 129.9, 128.0, 127.8, 79.8, 78.5, 67.0, 58.7, 41.4, 35.3, 27.4, 26.2, 19.7, 18.7, -4.3, -4.7; HRMS *m/z* : calcd for [C<sub>29</sub>H<sub>46</sub>NaO<sub>4</sub>Si<sub>2</sub>]<sup>+</sup> ([M + Na]<sup>+</sup>) 537.2827, found: 537.2823.

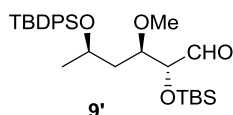

The same reaction condition was followed to obtain the required product **9'** in 86% as a colorless oil.  $[\alpha]_D^{25} = -4.1^\circ$  (*c* 1.07, CHCl<sub>3</sub>); <sup>1</sup>H-NMR (300 MHz, CDCl<sub>3</sub>)  $\delta$  9.61 (d, *J* = 1.46 Hz, 1 H), 7.68 (m, 4 H), 7.38 (m, 6 H), 4.06 (m, 2 H), 3.70 (m, 1 H), 3.22 (s, 3 H), 1.67 (m, 1 H), 1.52 (m, 1 H), 1.05 (s, 9 H), 1.03 (d, *J* = 6.24 Hz, 3 H), 0.92 (s, 9 H), 0.07 (s, 6 H); <sup>13</sup>C-NMR (300 MHz, CDCl<sub>3</sub>)  $\delta$  203.8, 135.9, 134.9, 134.1, 129.6, 129.4, 127.6, 127.4, 80.2, 79.3, 66.6, 58.0, 41.6, 29.7, 27.0, 25.7, 24.5, 19.3, 18.2, -4.9, -5.0; HRMS *m/z* : calcd for [C<sub>29</sub>H<sub>47</sub>O<sub>4</sub>Si<sub>2</sub>]<sup>+</sup> ([M + H]<sup>+</sup>) 515.3007, found: 515.3005.

#### 4,6-dideoxy-3-*O*-methyl-*D*-xylo-hexose (**I**) [4] and

#### 4,6-dideoxy-3-*O*-methyl-*D*-ribo-hexose (**I'**)

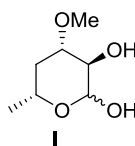

A solution of **13** (100 mg, 0.19 mmol) and TBAF (0.57 mL, 0.57 mmol, 1.0 M in THF) in THF (1 mL) was stirred at room temperature for 1 h. Saturated aqueous ammonium chloride (5 mL) was added and the mixture was extracted with EtOAc. The combined organic layers were washed with brine, dried (anhydrous Na<sub>2</sub>SO<sub>4</sub>), filtered and concentrated. The residue was purified by flash silica gel column chromatography (dichloromethane: acetone, 15: 1) to afford compound **I** as a white solid (26 mg, 84%). Mp 91–93 °C;  $[\alpha]_D^{25} = +130.0^\circ$  (*c* 0.49, H<sub>2</sub>O, 5 min);  $[\alpha]_D^{25} = +75.8^\circ$  (*c* 0.49, H<sub>2</sub>O, 4 h); <sup>1</sup>H-NMR (300 MHz, CDCl<sub>3</sub>)  $\delta$  5.57 (br. s, 0.49 H), 5.24 (d,

$J = 2.01$  Hz, 0.45 H- $\alpha$ ), 4.80 (br. s, 0.51 H), 4.50 (d,  $J = 7.04$  Hz, 0.55 H- $\beta$ ), 4.13 (m, 1 H), 3.56 (m, 1 H), 3.41 (s, 3 H), 3.27 (m, 1 H), 2.07 (m, 1 H), 1.31 (m, 1 H), 1.24 (d,  $J = 6.29$  Hz, 1.63 H), 1.18 (d,  $J = 6.29$  Hz, 1.37 H);  $^{13}\text{C}$ -NMR (300 MHz,  $\text{CDCl}_3$ )  $\delta$  96.7 ( $\beta$ -D), 92.8 ( $\alpha$ -D), 80.0, 72.7, 68.1, 56.9, 37.1, 21.0; HRMS  $m/z$ : calcd for  $[\text{C}_7\text{H}_{15}\text{O}_4]^+$  ( $[\text{M} + \text{H}]^+$ ) 163.0965, found: 163.0944.

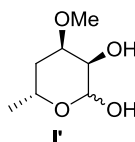

The same reaction condition was followed to obtain the required product **I'** in 83% as a white solid. Mp 96–98 °C;  $[\alpha]_D^{25} = -24.4^\circ$  ( $c$  0.54,  $\text{H}_2\text{O}$ , 5 min);  $[\alpha]_D^{25} = -12.6^\circ$  ( $c$  0.54,  $\text{H}_2\text{O}$ , 4 h);  $^1\text{H}$ -NMR (300 MHz,  $\text{CDCl}_3$ )  $\delta$  5.01 (d,  $J = 2.07$  Hz, 0.55 H- $\alpha$ ), 4.81 (d,  $J = 8.10$  Hz, 0.50 H- $\beta$ ), 4.08 (m, 1 H), 3.88 (m, 1 H), 3.43 (s, 3 H), 3.28 (m, 1 H), 2.03 (m, 1 H), 1.74 (m, 1 H), 1.18 (d,  $J = 6.29$  Hz, 3 H);  $^{13}\text{C}$ -NMR (300 MHz,  $\text{CDCl}_3$ )  $\delta$  94.8 ( $\beta$ -D), 94.6 ( $\alpha$ -D), 78.9, 72.7, 66.3, 57.9, 34.5, 20.6; HRMS  $m/z$ : calcd for  $[\text{C}_7\text{H}_{14}\text{NaO}_4]^+$  ( $[\text{M} + \text{Na}]^+$ ) 185.0784, found: 185.0799.

#### 1,2-di-*O*-acetyl-D-chalcose (**14**) [5] and

#### 4,6-dideoxy-3-*O*-methyl-D-ribo-hexopyranose diacetate (**10'**)

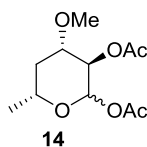

Acetic anhydride (0.40 mL, 1.08 mmol) and pyridine (0.11 mL, 1.34 mmol) were added to compound **I** (100 mg, 0.54 mmol) in dry  $\text{CH}_2\text{Cl}_2$  (1 mL) and maintained at room temperature for 24 h. The mixture was then neutralized with diluted HCl and the mixture was extracted with EtOAc. The combined organic layers were washed with brine, dried (anhydrous  $\text{Na}_2\text{SO}_4$ ), filtered and concentrated. The residue was purified by flash silica gel column chromatography ( $\text{CH}_2\text{Cl}_2$ :  $\text{CH}_3\text{OH}$ , 25: 1) to afford compound **14** as a white solid. (116 mg, 80%). Mp 77–79 °C;  $[\alpha]_D^{25} = +34.2^\circ$  ( $c$  0.88,  $\text{CHCl}_3$ );  $^1\text{H}$ -NMR (300 MHz,  $\text{CDCl}_3$ )  $\delta$  6.24 (d,  $J = 3.54$  Hz, 0.38 H- $\alpha$ ), 5.56 (d,  $J = 8.25$  Hz, 1 H- $\beta$ ), 4.88 (m, 1 H), 3.87 (m, 1 H), 3.65 (m, 1 H), 3.34 (s, 3 H),

2.07 (s, 3 H), 2.06 (s, 3 H), 1.70 (m, 1 H), 1.61 (m, 1 H), 1.28 (d,  $J = 6.32$  Hz, 3 H);  $^{13}\text{C}$ -NMR (300 MHz,  $\text{CDCl}_3$ )  $\delta$  169.8, 169.6, 99.9 ( $\beta$ -D), 92.5 ( $\alpha$ -D), 78.2, 77.6, 69.1, 55.2, 37.1, 29.8, 21.0, 20.8; HRMS  $m/z$  : calcd for  $[\text{C}_{11}\text{H}_{18}\text{NaO}_6]^+$  ( $[\text{M} + \text{Na}]^+$ ) 269.0996, found: 269.0998.

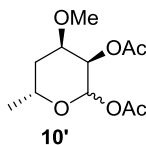

The same reaction condition was followed to obtain the required product **10'** in 80% as a white solid. Mp 73–75 °C;  $[\alpha]_D^{25} = -47.5^\circ$  ( $c$  1.08,  $\text{CHCl}_3$ );  $^1\text{H}$ -NMR (300 MHz,  $\text{CDCl}_3$ )  $\delta$  6.01 (d,  $J = 8.44$  Hz, 1 H- $\beta$ ), 4.72 (dd,  $J = 8.44$  Hz,  $J = 3.14$  Hz, 1 H), 4.08 (m, 1 H), 3.84 (m, 1 H), 3.37 (s, 3 H), 2.08 (s, 3 H), 2.07 (s, 3 H), 1.96 (m, 1 H), 1.49 (m, 1 H), 1.21 (d,  $J = 6.32$  Hz, 3 H);  $^{13}\text{C}$ -NMR (300 MHz,  $\text{CDCl}_3$ )  $\delta$  170.2, 169.3, 90.5, 75.2, 72.1, 67.6, 58.0, 35.8, 21.0, 20.9, 20.6; HRMS  $m/z$  : calcd for  $[\text{C}_{11}\text{H}_{18}\text{NaO}_6]^+$  ( $[\text{M} + \text{Na}]^+$ ) 269.0996, found: 269.0991.

## References

1. Snider, B. B.; Shi, Z. P. *J. Am. Chem. Soc.* **1994**, *116*, 549-557.
2. Claffey, M. M.; Heathcock, C. H. *J. Org. Chem.* **1996**, *61*, 7646-7647.
3. Jana, N.; Mahapatra, T.; Nanda, S. *Tetrahedron: Asymmetry*. **2009**, *20*, 2622-2628.
4. Woo, P. W. K.; Dion, H. W.; Johnson, L. F. *J. Amer. Chem. Soc.* **1962**, *84*, 1066-1067.
5. Redlich, H.; Roy, W. *Carbohydr. Chem.* **1979**, *68*, 275-285.

# Direct Mass Spectrometry Analysis

**Analysis Name:** 10030742.d  
**Sample Name:** SJ20100305

**Instrument:** LC-MSD-Trip-SL  
**Operator:** SL

**Print Date:** 2010-3-8 21:07:18  
**Acq. Date:** 2010-3-8 21:05:37

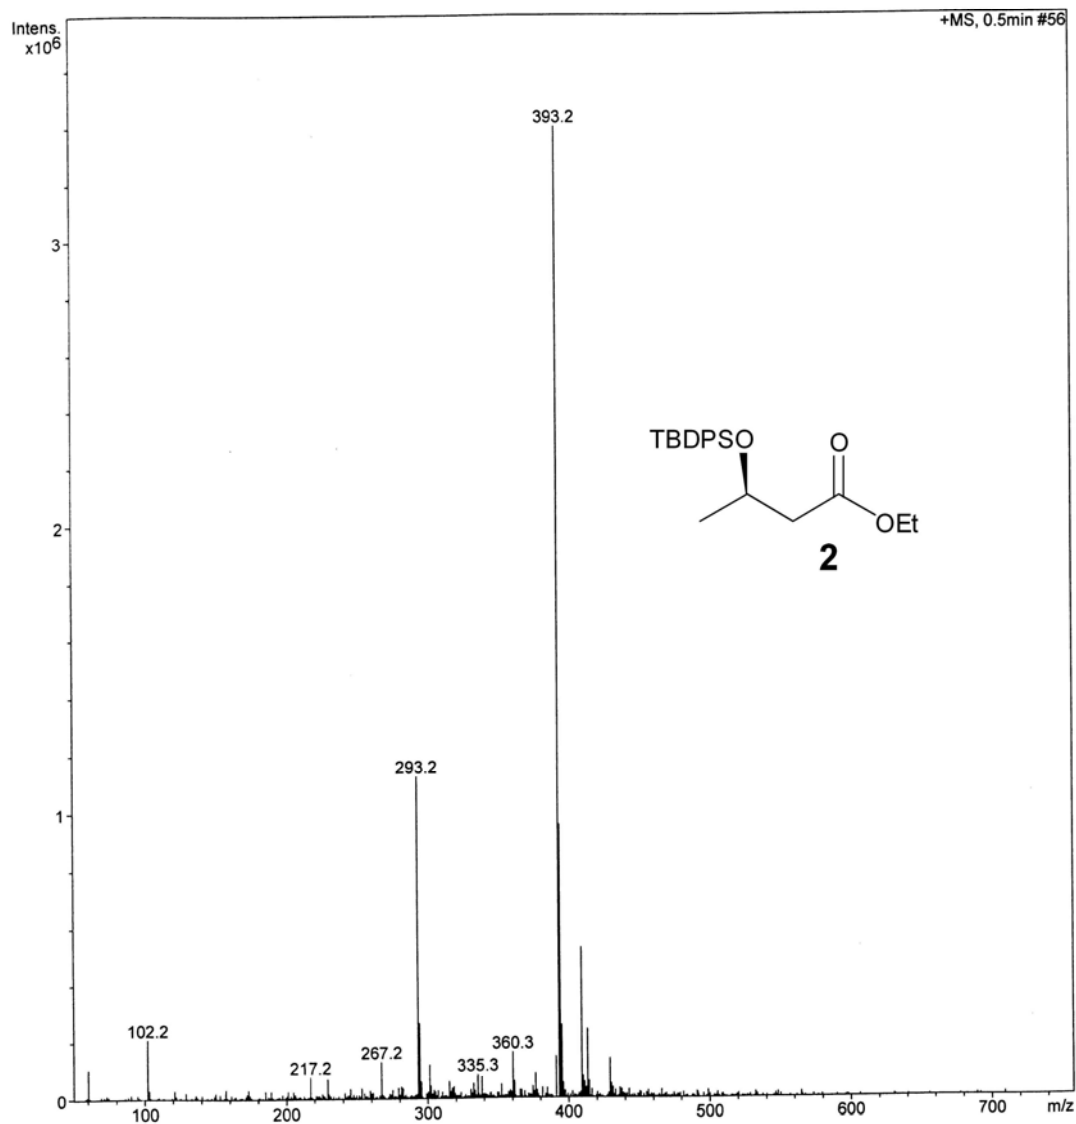

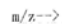

# Direct Mass Spectrometry Analysis

**Analysis Name:** 12022517.d  
**Sample Name:** SJ201112141

**Instrument:** LC-MSD-Trip-SL  
**Operator:** admin

**Print Date:** 2/25/2012 8:24:31 PM  
**Acq. Date:** 2/25/2012 8:23:00 PM

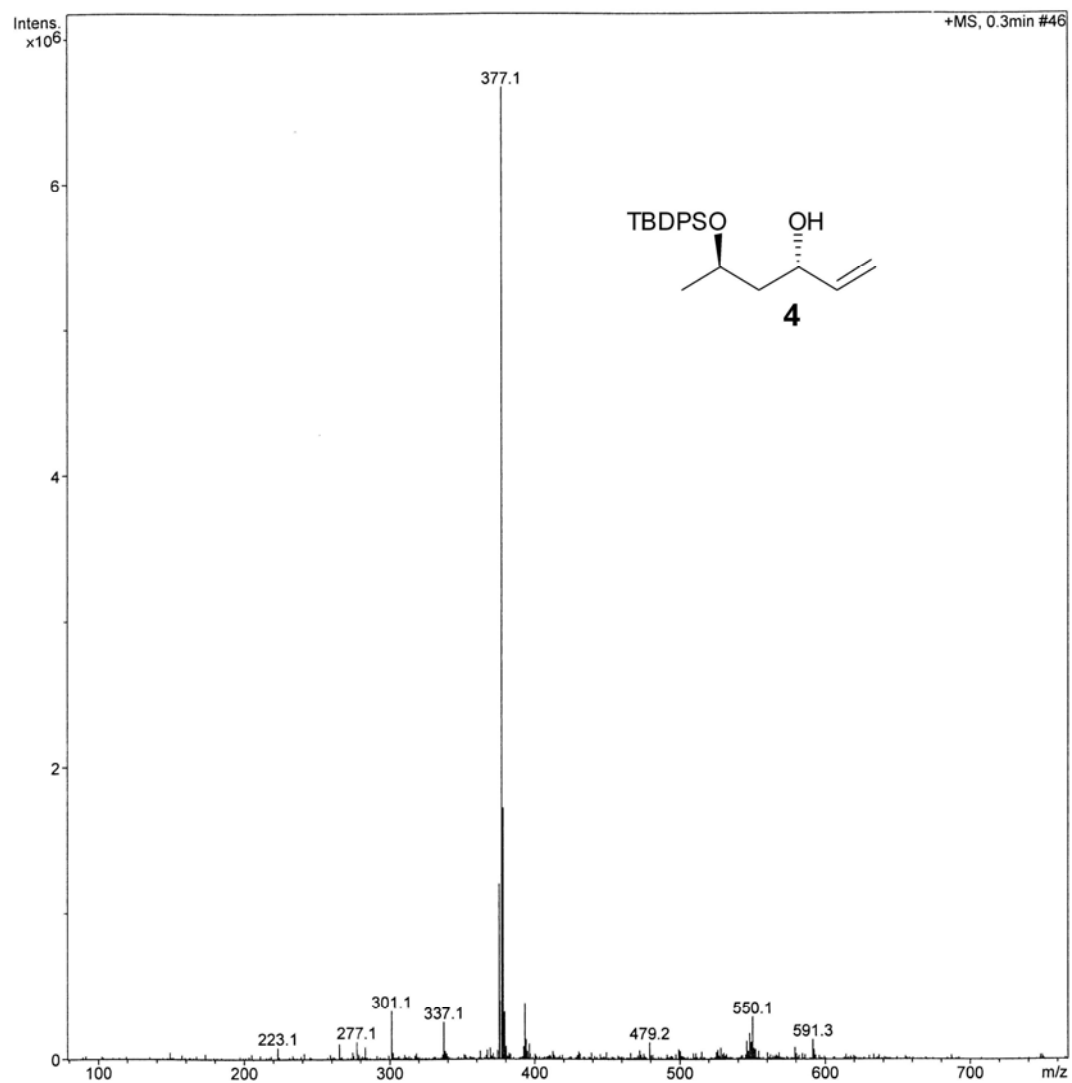



# Direct Mass Spectrometry Analysis

Analysis Name: 12022434.d  
Sample Name: SJ201112142

Instrument: LC-MSD-Trip-SL  
Operator: admin

Print Date: 2/24/2012 9:46:50 PM  
Acq. Date: 2/24/2012 9:46:03 PM

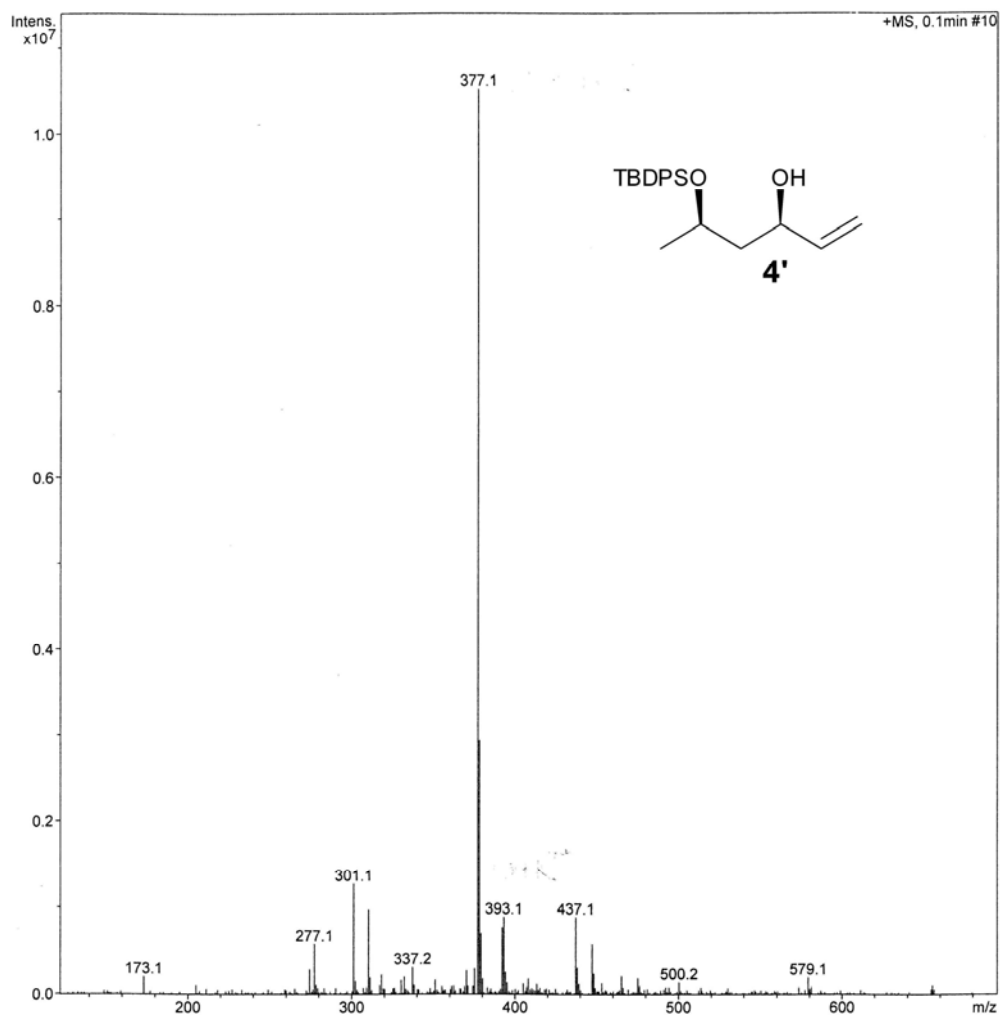

## Mass Spectrum Molecular Formula Report

### Analysis Info

Analysis Name D:\Data\20130622\SJ20120228--.d  
 Method yujia-shuijie.m  
 Sample Name SJ20120228--  
 Comment

Acquisition Date 6/22/2013 4:22:11 PM

Operator Bruker Customer  
 Instrument / Ser# micrOTOF-Q 125

### Acquisition Parameter

|             |            |                       |           |                  |           |
|-------------|------------|-----------------------|-----------|------------------|-----------|
| Source Type | ESI        | Ion Polarity          | Positive  | Set Nebulizer    | 0.3 Bar   |
| Focus       | Not active | Set Capillary         | 4500 V    | Set Dry Heater   | 180 °C    |
| Scan Begin  | 50 m/z     | Set End Plate Offset  | -500 V    | Set Dry Gas      | 1.2 l/min |
| Scan End    | 3000 m/z   | Set Collision Cell RF | 450.0 Vpp | Set Divert Valve | Source    |

### Generate Molecular Formula Parameter

|                  |             |                        |      |     |         |   |
|------------------|-------------|------------------------|------|-----|---------|---|
| Formula, min.    | C23H32O2SiH |                        |      |     |         |   |
| Formula, max.    |             |                        |      |     |         |   |
| Measured m/z     | 369.224     | Tolerance              | 5    | ppm | Charge  | 1 |
| Check Valence    | no          | Minimum                | 0    |     | Maximum | 0 |
| Nitrogen Rule    | yes         | Electron Configuration | both |     | Maximum | 3 |
| Filter H/C Ratio | yes         | Minimum                | 0    |     |         |   |
| Estimate Carbon  | yes         |                        |      |     |         |   |

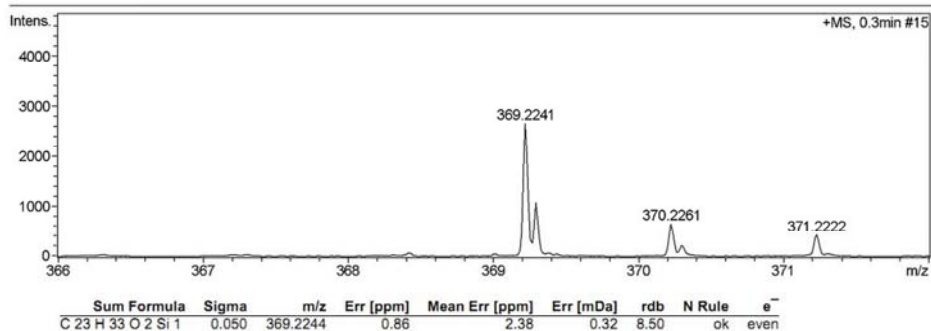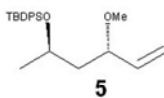

## Mass Spectrum Molecular Formula Report

### Analysis Info

Analysis Name D:\Data\20130622\SJ20120225.d  
 Method yujia-shuijie.m  
 Sample Name SJ20120225  
 Comment

Acquisition Date 6/22/2013 4:28:24 PM

Operator Bruker Customer  
 Instrument / Ser# micrOTOF-Q 125

### Acquisition Parameter

|             |            |                       |           |                  |           |
|-------------|------------|-----------------------|-----------|------------------|-----------|
| Source Type | ESI        | Ion Polarity          | Positive  | Set Nebulizer    | 0.3 Bar   |
| Focus       | Not active | Set Capillary         | 4500 V    | Set Dry Heater   | 180 °C    |
| Scan Begin  | 50 m/z     | Set End Plate Offset  | -500 V    | Set Dry Gas      | 1.2 l/min |
| Scan End    | 3000 m/z   | Set Collision Cell RF | 700.0 Vpp | Set Divert Valve | Source    |

### Generate Molecular Formula Parameter

|                  |              |                        |       |         |   |
|------------------|--------------|------------------------|-------|---------|---|
| Formula, min.    | C23H32O2SiNa |                        |       |         |   |
| Formula, max.    |              |                        |       |         |   |
| Measured m/z     | 391.206      | Tolerance              | 5 ppm | Charge  | 1 |
| Check Valence    | no           | Minimum                | 0     | Maximum | 0 |
| Nitrogen Rule    | yes          | Electron Configuration | both  |         |   |
| Filter H/C Ratio | yes          | Minimum                | 0     | Maximum | 3 |
| Estimate Carbon  | yes          |                        |       |         |   |

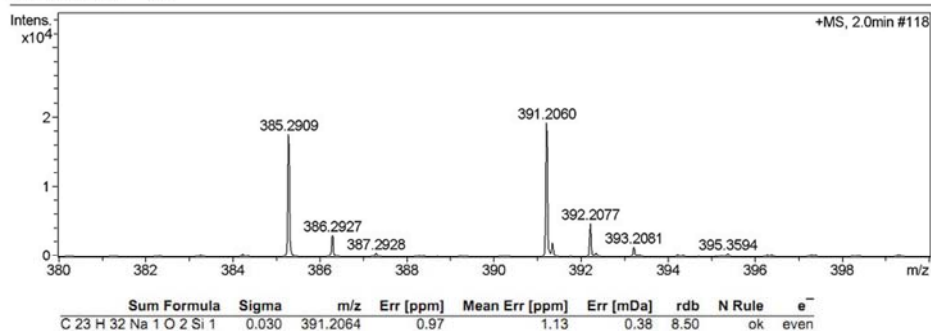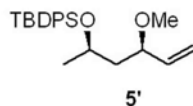

## Mass Spectrum Molecular Formula Report

### Analysis Info

Analysis Name D:\Data\20130622\SJ20120510.d  
 Method yujia-shuijie.m  
 Sample Name SJ20120510  
 Comment

Acquisition Date 6/22/2013 4:32:31 PM

Operator Bruker Customer  
 Instrument / Ser# micrOTOF-Q 125

### Acquisition Parameter

|             |            |                       |           |                  |           |
|-------------|------------|-----------------------|-----------|------------------|-----------|
| Source Type | ESI        | Ion Polarity          | Positive  | Set Nebulizer    | 0.3 Bar   |
| Focus       | Not active | Set Capillary         | 4500 V    | Set Dry Heater   | 180 °C    |
| Scan Begin  | 50 m/z     | Set End Plate Offset  | -500 V    | Set Dry Gas      | 1.2 l/min |
| Scan End    | 3000 m/z   | Set Collision Cell RF | 450.0 Vpp | Set Divert Valve | Source    |

### Generate Molecular Formula Parameter

|                  |             |                             |   |     |         |   |
|------------------|-------------|-----------------------------|---|-----|---------|---|
| Formula, min.    | C23H34O4SiH |                             |   |     |         |   |
| Formula, max.    |             |                             |   |     |         |   |
| Measured m/z     | 403.229     | Tolerance                   | 5 | ppm | Charge  | 1 |
| Check Valence    | no          | Minimum                     | 0 |     | Maximum | 0 |
| Nitrogen Rule    | yes         | Electron Configuration both |   |     |         |   |
| Filter H/C Ratio | yes         | Minimum                     | 0 |     | Maximum | 3 |
| Estimate Carbon  | yes         |                             |   |     |         |   |

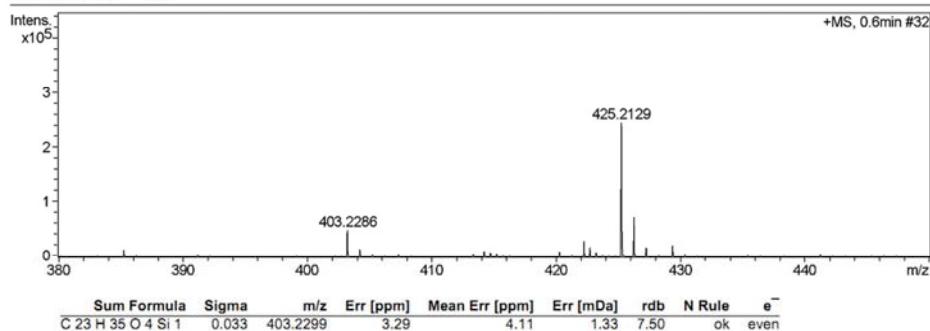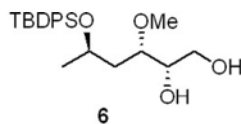

## Mass Spectrum Molecular Formula Report

### Analysis Info

Analysis Name D:\Data\20130622\SJ20120511.d  
 Method yujia-shuijie.m  
 Sample Name SJ20120511  
 Comment

Acquisition Date 6/22/2013 4:35:51 PM

Operator Bruker Customer  
 Instrument / Ser# micrOTOF-Q 125

### Acquisition Parameter

|             |            |                       |           |                  |           |
|-------------|------------|-----------------------|-----------|------------------|-----------|
| Source Type | ESI        | Ion Polarity          | Positive  | Set Nebulizer    | 0.3 Bar   |
| Focus       | Not active | Set Capillary         | 4500 V    | Set Dry Heater   | 180 °C    |
| Scan Begin  | 50 m/z     | Set End Plate Offset  | -500 V    | Set Dry Gas      | 1.2 l/min |
| Scan End    | 3000 m/z   | Set Collision Cell RF | 450.0 Vpp | Set Divert Valve | Source    |

### Generate Molecular Formula Parameter

|                  |              |                             |   |     |         |   |
|------------------|--------------|-----------------------------|---|-----|---------|---|
| Formula, min.    | C23H34O4SiNa |                             |   |     |         |   |
| Formula, max.    |              |                             |   |     |         |   |
| Measured m/z     | 425.212      | Tolerance                   | 5 | ppm | Charge  | 1 |
| Check Valence    | no           | Minimum                     | 0 |     | Maximum | 0 |
| Nitrogen Rule    | yes          | Electron Configuration both |   |     |         |   |
| Filter H/C Ratio | yes          | Minimum                     | 0 |     | Maximum | 3 |
| Estimate Carbon  | yes          |                             |   |     |         |   |

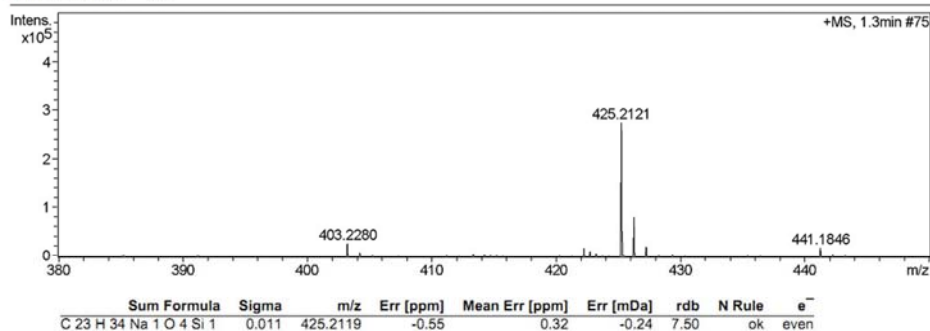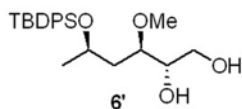

## Mass Spectrum Molecular Formula Report

### Analysis Info

Analysis Name D:\Data\20130626\SJ20121123-1.d  
 Method MA250-550POS.m  
 Sample Name SJ20121123-1  
 Comment

Acquisition Date 6/26/2013 10:34:30 AM

Operator Bruker Customer  
 Instrument / Ser# micrOTOF-Q 125

### Acquisition Parameter

|             |            |                       |           |                  |           |
|-------------|------------|-----------------------|-----------|------------------|-----------|
| Source Type | ESI        | Ion Polarity          | Positive  | Set Nebulizer    | 0.3 Bar   |
| Focus       | Not active | Set Capillary         | 4500 V    | Set Dry Heater   | 180 °C    |
| Scan Begin  | 50 m/z     | Set End Plate Offset  | -500 V    | Set Dry Gas      | 4.0 l/min |
| Scan End    | 3000 m/z   | Set Collision Cell RF | 900.0 Vpp | Set Divert Valve | Source    |

### Generate Molecular Formula Parameter

|                  |               |                             |   |     |         |   |
|------------------|---------------|-----------------------------|---|-----|---------|---|
| Formula, min.    | C35H62O4Si3Na |                             |   |     |         |   |
| Formula, max.    |               |                             |   |     |         |   |
| Measured m/z     | 653.385       | Tolerance                   | 5 | ppm | Charge  | 1 |
| Check Valence    | no            | Minimum                     | 0 |     | Maximum | 0 |
| Nitrogen Rule    | no            | Electron Configuration both |   |     |         |   |
| Filter H/C Ratio | no            | Minimum                     | 0 |     | Maximum | 3 |
| Estimate Carbon  | yes           |                             |   |     |         |   |

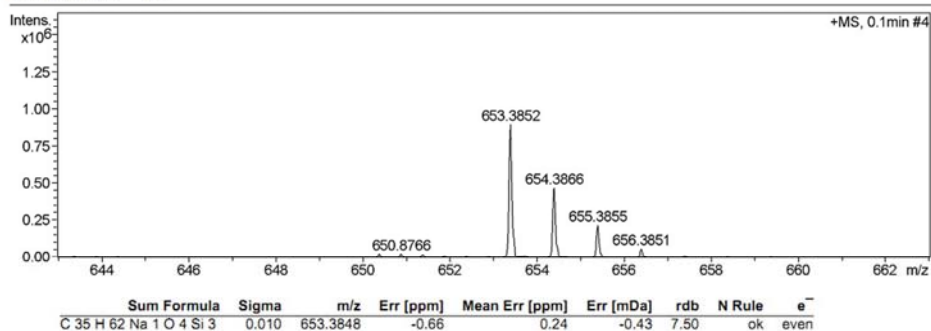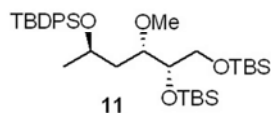

## Mass Spectrum Molecular Formula Report

### Analysis Info

Analysis Name D:\Data\20130622\SJ201205218.d  
 Method yujia-shuijie.m  
 Sample Name SJ201205218  
 Comment

Acquisition Date 6/22/2013 4:43:04 PM

Operator Bruker Customer  
 Instrument / Ser# micrOTOF-Q 125

### Acquisition Parameter

|             |            |                       |           |                  |           |
|-------------|------------|-----------------------|-----------|------------------|-----------|
| Source Type | ESI        | Ion Polarity          | Positive  | Set Nebulizer    | 0.3 Bar   |
| Focus       | Not active | Set Capillary         | 4500 V    | Set Dry Heater   | 180 °C    |
| Scan Begin  | 50 m/z     | Set End Plate Offset  | -500 V    | Set Dry Gas      | 1.2 l/min |
| Scan End    | 3000 m/z   | Set Collision Cell RF | 700.0 Vpp | Set Divert Valve | Source    |

### Generate Molecular Formula Parameter

|                  |               |                        |      |     |         |   |
|------------------|---------------|------------------------|------|-----|---------|---|
| Formula, min.    | C35H62O4Si3Na |                        |      |     |         |   |
| Formula, max.    |               |                        |      |     |         |   |
| Measured m/z     | 653.385       | Tolerance              | 5    | ppm | Charge  | 1 |
| Check Valence    | no            | Minimum                | 0    |     | Maximum | 0 |
| Nitrogen Rule    | yes           | Electron Configuration | both |     |         |   |
| Filter H/C Ratio | yes           | Minimum                | 0    |     | Maximum | 3 |
| Estimate Carbon  | yes           |                        |      |     |         |   |

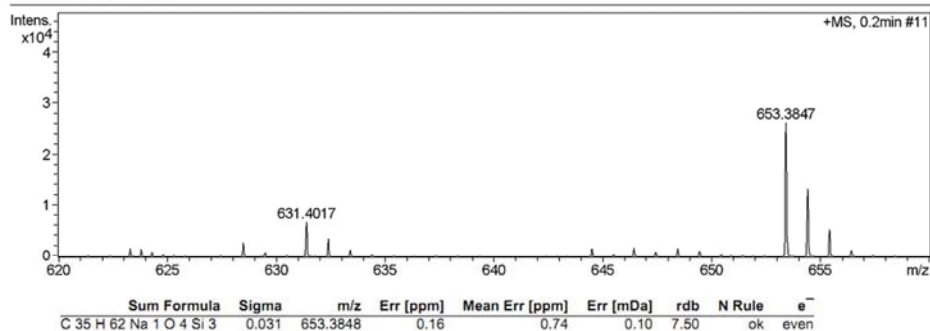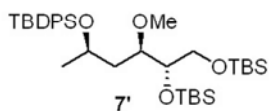

## Mass Spectrum Molecular Formula Report

### Analysis Info

Analysis Name D:\Data\20130622\SJ201205242--.d  
 Method yujia-shuijie.m  
 Sample Name SJ201205242--  
 Comment

Acquisition Date 6/22/2013 4:24:24 PM

Operator Bruker Customer  
 Instrument / Ser# micrOTOF-Q 125

### Acquisition Parameter

|             |            |                       |           |                  |           |
|-------------|------------|-----------------------|-----------|------------------|-----------|
| Source Type | ESI        | Ion Polarity          | Positive  | Set Nebulizer    | 0.3 Bar   |
| Focus       | Not active | Set Capillary         | 4500 V    | Set Dry Heater   | 180 °C    |
| Scan Begin  | 50 m/z     | Set End Plate Offset  | -500 V    | Set Dry Gas      | 1.2 l/min |
| Scan End    | 3000 m/z   | Set Collision Cell RF | 500.0 Vpp | Set Divert Valve | Source    |

### Generate Molecular Formula Parameter

Formula, min. C29H48O4Si2Na

|                  |         |                             |       |         |   |
|------------------|---------|-----------------------------|-------|---------|---|
| Formula, max.    |         |                             |       |         |   |
| Measured m/z     | 539.298 | Tolerance                   | 5 ppm | Charge  | 1 |
| Check Valence    | no      | Minimum                     | 0     | Maximum | 0 |
| Nitrogen Rule    | yes     | Electron Configuration both |       |         |   |
| Filter H/C Ratio | yes     | Minimum                     | 0     | Maximum | 3 |
| Estimate Carbon  | yes     |                             |       |         |   |

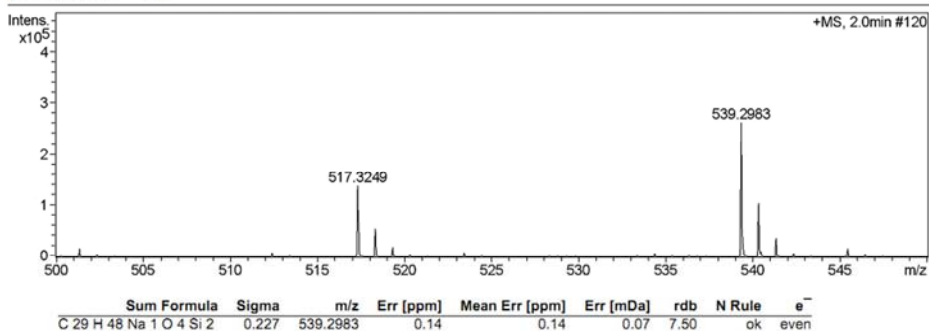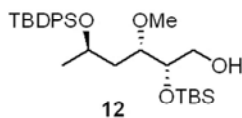





## Mass Spectrum Molecular Formula Report

### Analysis Info

Analysis Name D:\Data\20130622\SJ20121129A.d  
 Method yujia-shuijie.m  
 Sample Name SJ20121129A  
 Comment

Acquisition Date 6/22/2013 4:51:26 PM

Operator Bruker Customer  
 Instrument / Ser# micrOTOF-Q 125

### Acquisition Parameter

|             |            |                       |           |                  |           |
|-------------|------------|-----------------------|-----------|------------------|-----------|
| Source Type | ESI        | Ion Polarity          | Positive  | Set Nebulizer    | 0.3 Bar   |
| Focus       | Not active | Set Capillary         | 4500 V    | Set Dry Heater   | 180 °C    |
| Scan Begin  | 50 m/z     | Set End Plate Offset  | -500 V    | Set Dry Gas      | 1.2 l/min |
| Scan End    | 3000 m/z   | Set Collision Cell RF | 700.0 Vpp | Set Divert Valve | Source    |

### Generate Molecular Formula Parameter

|                  |                                                                   |                        |      |     |         |   |
|------------------|-------------------------------------------------------------------|------------------------|------|-----|---------|---|
| Formula, min.    | C <sub>29</sub> H <sub>46</sub> O <sub>4</sub> Si <sub>2</sub> Na |                        |      |     |         |   |
| Formula, max.    |                                                                   |                        |      |     |         |   |
| Measured m/z     | 537.282                                                           | Tolerance              | 5    | ppm | Charge  | 1 |
| Check Valence    | no                                                                | Minimum                | 0    |     | Maximum | 0 |
| Nitrogen Rule    | yes                                                               | Electron Configuration | both |     |         |   |
| Filter H/C Ratio | yes                                                               | Minimum                | 0    |     | Maximum | 3 |
| Estimate Carbon  | yes                                                               |                        |      |     |         |   |

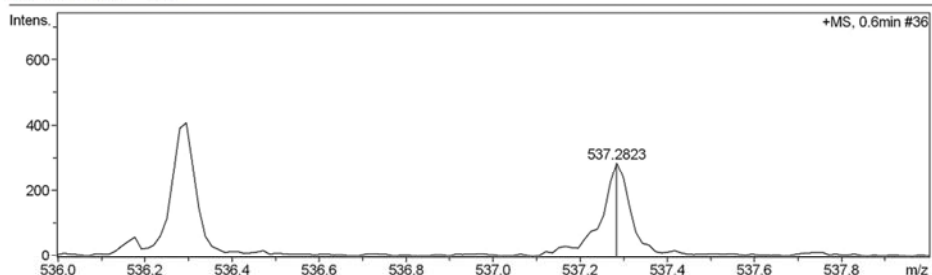

| Sum Formula                                                                    | Sigma | m/z      | Err [ppm] | Mean Err [ppm] | Err [mDa] | rdb  | N Rule | e <sup>-</sup> |
|--------------------------------------------------------------------------------|-------|----------|-----------|----------------|-----------|------|--------|----------------|
| C <sub>29</sub> H <sub>46</sub> O <sub>4</sub> Na <sub>1</sub> Si <sub>2</sub> | 0.227 | 537.2827 | 0.64      | 0.63           | 0.34      | 8.50 | ok     | even           |

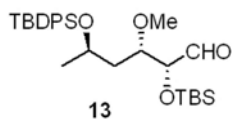

## Mass Spectrum Molecular Formula Report

### Analysis Info

Analysis Name D:\Data\20130622\SJ20120904.d  
 Method yujia-shuijie.m  
 Sample Name SJ20120904  
 Comment

Acquisition Date 6/22/2013 4:48:20 PM

Operator Bruker Customer  
 Instrument / Ser# micrOTOF-Q 125

### Acquisition Parameter

|             |            |                       |           |                  |           |
|-------------|------------|-----------------------|-----------|------------------|-----------|
| Source Type | ESI        | Ion Polarity          | Positive  | Set Nebulizer    | 0.3 Bar   |
| Focus       | Not active | Set Capillary         | 4500 V    | Set Dry Heater   | 180 °C    |
| Scan Begin  | 50 m/z     | Set End Plate Offset  | -500 V    | Set Dry Gas      | 1.2 l/min |
| Scan End    | 3000 m/z   | Set Collision Cell RF | 600.0 Vpp | Set Divert Valve | Source    |

### Generate Molecular Formula Parameter

|                  |              |                        |      |     |         |   |
|------------------|--------------|------------------------|------|-----|---------|---|
| Formula, min.    | C29H46O4Si2H |                        |      |     |         |   |
| Formula, max.    |              |                        |      |     |         |   |
| Measured m/z     | 515.301      | Tolerance              | 10   | ppm | Charge  | 1 |
| Check Valence    | no           | Minimum                | 0    |     | Maximum | 0 |
| Nitrogen Rule    | yes          | Electron Configuration | both |     |         |   |
| Filter H/C Ratio | yes          | Minimum                | 0    |     | Maximum | 3 |
| Estimate Carbon  | yes          |                        |      |     |         |   |

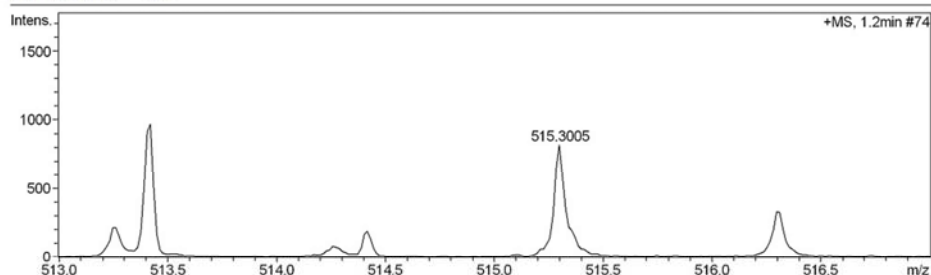

| Sum Formula        | Sigma | m/z      | Err [ppm] | Mean Err [ppm] | Err [mDa] | rdb  | N Rule | e <sup>-</sup> |
|--------------------|-------|----------|-----------|----------------|-----------|------|--------|----------------|
| C 29 H 47 O 4 Si 2 | 0.227 | 515.3007 | 0.48      | 0.48           | 0.25      | 8.50 | ok     | even           |

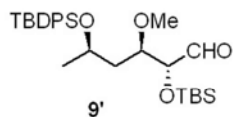

# Mass Spectrum Molecular Formula Report

## Analysis Info

Analysis Name D:\Data\20130622\SJ20121130A.d  
 Method yujia-shuijie.m  
 Sample Name SJ20121130A  
 Comment

Acquisition Date 6/22/2013 4:55:08 PM

Operator Bruker Customer  
 Instrument / Ser# micrOTOF-Q 125

## Acquisition Parameter

|             |            |                       |           |                  |           |
|-------------|------------|-----------------------|-----------|------------------|-----------|
| Source Type | ESI        | Ion Polarity          | Positive  | Set Nebulizer    | 0.3 Bar   |
| Focus       | Not active | Set Capillary         | 4500 V    | Set Dry Heater   | 180 °C    |
| Scan Begin  | 50 m/z     | Set End Plate Offset  | -500 V    | Set Dry Gas      | 1.2 l/min |
| Scan End    | 3000 m/z   | Set Collision Cell RF | 200.0 Vpp | Set Divert Valve | Source    |

## Generate Molecular Formula Parameter

|                  |          |                        |       |         |   |
|------------------|----------|------------------------|-------|---------|---|
| Formula, min.    | C7H14O4H |                        |       |         |   |
| Formula, max.    |          |                        |       |         |   |
| Measured m/z     | 163.094  | Tolerance              | 5 mDa | Charge  | 1 |
| Check Valence    | no       | Minimum                | 0     | Maximum | 0 |
| Nitrogen Rule    | yes      | Electron Configuration | both  |         |   |
| Filter H/C Ratio | yes      | Minimum                | 0     | Maximum | 3 |
| Estimate Carbon  | yes      |                        |       |         |   |

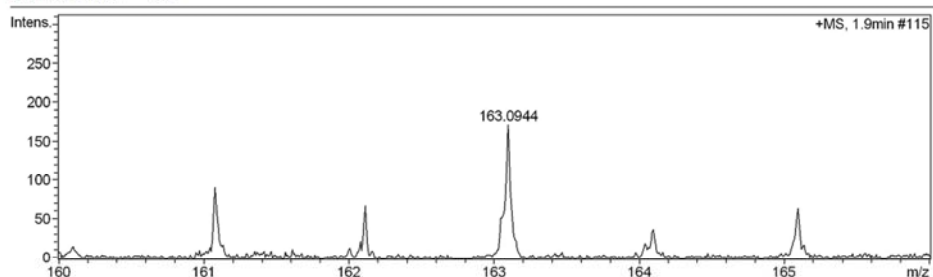

| Sum Formula  | Sigma | m/z      | Err [ppm] | Mean Err [ppm] | Err [mDa] | rdb  | N Rule | e <sup>-</sup> |
|--------------|-------|----------|-----------|----------------|-----------|------|--------|----------------|
| C 7 H 15 O 4 | 0.046 | 163.0965 | 12.84     | 12.69          | 2.09      | 0.50 | ok     | even           |

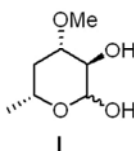

## Mass Spectrum Molecular Formula Report

### Analysis Info

Analysis Name D:\Data\20130626\SJ20121128A.d  
 Method MA250-550POS.m  
 Sample Name SJ20121128A  
 Comment

Acquisition Date 6/26/2013 10:29:15 AM

Operator Bruker Customer  
 Instrument / Ser# micrOTOF-Q 125

### Acquisition Parameter

|             |            |                       |           |                  |           |
|-------------|------------|-----------------------|-----------|------------------|-----------|
| Source Type | ESI        | Ion Polarity          | Positive  | Set Nebulizer    | 0.3 Bar   |
| Focus       | Not active | Set Capillary         | 4500 V    | Set Dry Heater   | 180 °C    |
| Scan Begin  | 50 m/z     | Set End Plate Offset  | -500 V    | Set Dry Gas      | 4.0 l/min |
| Scan End    | 3000 m/z   | Set Collision Cell RF | 300.0 Vpp | Set Divert Valve | Source    |

### Generate Molecular Formula Parameter

|                  |           |                             |   |     |         |   |
|------------------|-----------|-----------------------------|---|-----|---------|---|
| Formula, min.    | C7H14O4Na |                             |   |     |         |   |
| Formula, max.    |           |                             |   |     |         |   |
| Measured m/z     | 185.078   | Tolerance                   | 5 | ppm | Charge  | 1 |
| Check Valence    | no        | Minimum                     | 0 |     | Maximum | 0 |
| Nitrogen Rule    | no        | Electron Configuration both |   |     |         |   |
| Filter H/C Ratio | no        | Minimum                     | 0 |     | Maximum | 3 |
| Estimate Carbon  | yes       |                             |   |     |         |   |

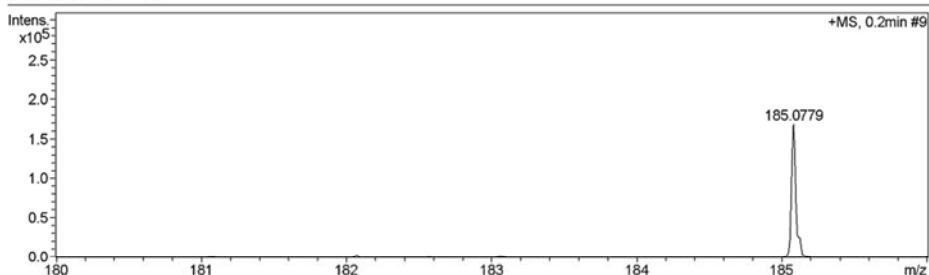

| Sum Formula       | Sigma | m/z      | Err [ppm] | Mean Err [ppm] | Err [mDa] | rdb  | N Rule | e <sup>-</sup> |
|-------------------|-------|----------|-----------|----------------|-----------|------|--------|----------------|
| C 7 H 14 Na 1 O 4 | 0.046 | 185.0784 | 3.01      | 3.01           | 0.56      | 0.50 | ok     | even           |

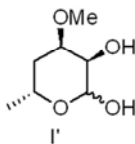

## Mass Spectrum Molecular Formula Report

### Analysis Info

Analysis Name D:\Data\20130622\SJ20130424B.d  
 Method yujia-shuijie.m  
 Sample Name SJ20130424B  
 Comment

Acquisition Date 6/22/2013 5:07:07 PM

Operator Bruker Customer  
 Instrument / Ser# micrOTOF-Q 125

### Acquisition Parameter

|             |            |                       |           |                  |           |
|-------------|------------|-----------------------|-----------|------------------|-----------|
| Source Type | ESI        | Ion Polarity          | Positive  | Set Nebulizer    | 0.3 Bar   |
| Focus       | Not active | Set Capillary         | 4500 V    | Set Dry Heater   | 180 °C    |
| Scan Begin  | 50 m/z     | Set End Plate Offset  | -500 V    | Set Dry Gas      | 1.2 l/min |
| Scan End    | 3000 m/z   | Set Collision Cell RF | 450.0 Vpp | Set Divert Valve | Source    |

### Generate Molecular Formula Parameter

|                  |            |                        |      |     |         |   |
|------------------|------------|------------------------|------|-----|---------|---|
| Formula, min.    | C11H18O6Na |                        |      |     |         |   |
| Formula, max.    |            |                        |      |     |         |   |
| Measured m/z     | 269.1      | Tolerance              | 5    | ppm | Charge  | 1 |
| Check Valence    | no         | Minimum                | 0    |     | Maximum | 0 |
| Nitrogen Rule    | yes        | Electron Configuration | both |     |         |   |
| Filter H/C Ratio | yes        | Minimum                | 0    |     | Maximum | 3 |
| Estimate Carbon  | yes        |                        |      |     |         |   |

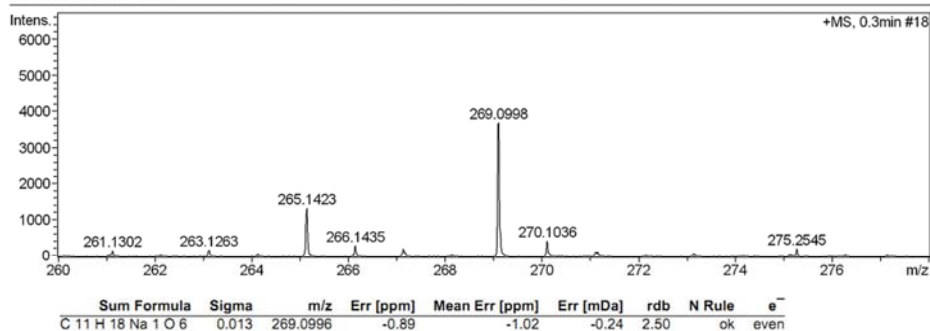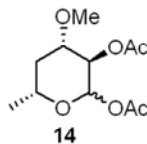

## Mass Spectrum Molecular Formula Report

### Analysis Info

Analysis Name D:\Data\20130622\SJ20130417.d  
 Method yujia-shuijie.m  
 Sample Name SJ20130417  
 Comment

Acquisition Date 6/22/2013 5:02:42 PM

Operator Bruker Customer  
 Instrument / Ser# micrOTOF-Q 125

### Acquisition Parameter

|             |            |                       |           |                  |           |
|-------------|------------|-----------------------|-----------|------------------|-----------|
| Source Type | ESI        | Ion Polarity          | Positive  | Set Nebulizer    | 0.3 Bar   |
| Focus       | Not active | Set Capillary         | 4500 V    | Set Dry Heater   | 180 °C    |
| Scan Begin  | 50 m/z     | Set End Plate Offset  | -500 V    | Set Dry Gas      | 1.2 l/min |
| Scan End    | 3000 m/z   | Set Collision Cell RF | 450.0 Vpp | Set Divert Valve | Source    |

### Generate Molecular Formula Parameter

|                  |            |                             |   |     |         |   |
|------------------|------------|-----------------------------|---|-----|---------|---|
| Formula, min.    | C11H18O6Na |                             |   |     |         |   |
| Formula, max.    |            |                             |   |     |         |   |
| Measured m/z     | 269.099    | Tolerance                   | 5 | ppm | Charge  | 1 |
| Check Valence    | no         | Minimum                     | 0 |     | Maximum | 0 |
| Nitrogen Rule    | yes        | Electron Configuration both |   |     |         |   |
| Filter H/C Ratio | yes        | Minimum                     | 0 |     | Maximum | 3 |
| Estimate Carbon  | yes        |                             |   |     |         |   |

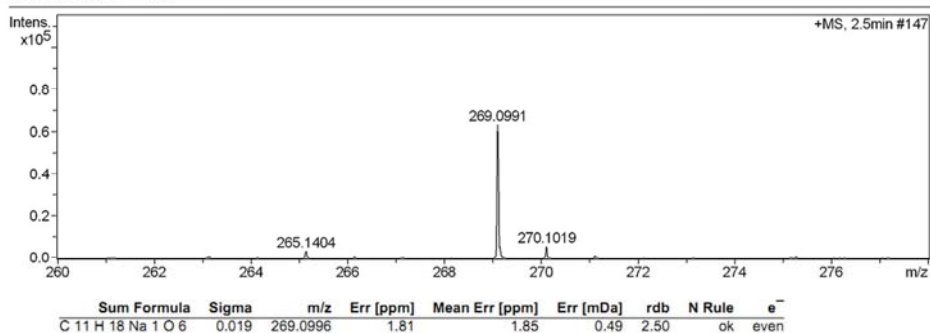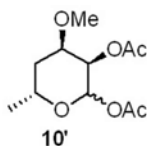

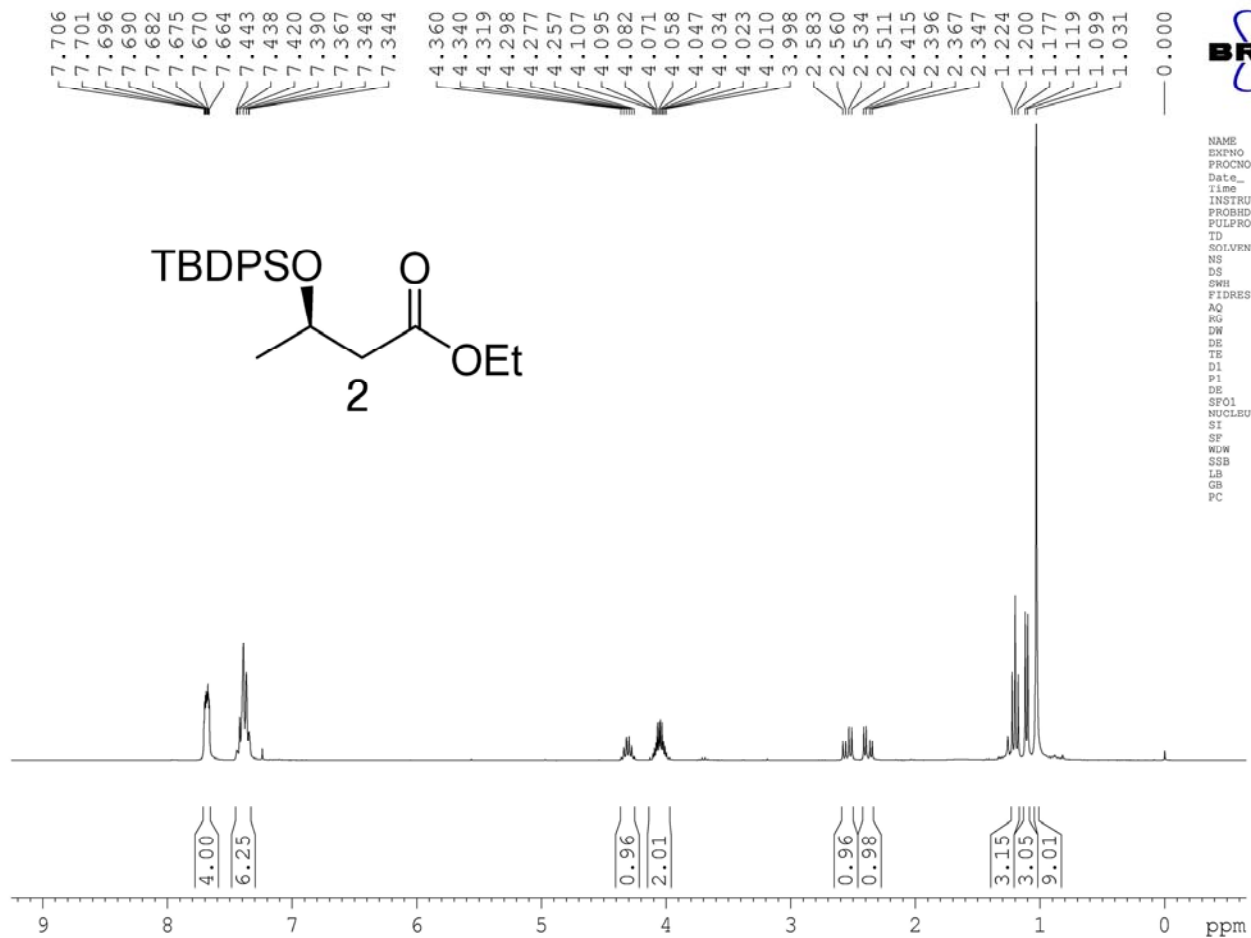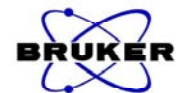

```

NAME      SJ20101011
EXPNO     1
PROCNO    1
Date_     20101019
Time      7.41
INSTRUM   srx300
PROBHD    5 mm QNP 1H
PULPROG   zg30
TD        32768
SOLVENT   cdcl3
NS         16
DS         2
SWH        6250.000 Hz
FIDRES     0.190735 Hz
AQ         2.6214900 sec
RG         360
DW         80.000 usec
DE         114.29 usec
TE         300.0 K
D1         1.00000000 sec
P1         12.40 usec
DE         114.29 usec
SFO1       300.1318534 MHz
NUCLEUS    1H
SI         16384
SF         300.1300119 MHz
WDW        EM
SSB        0
LB         0.30 Hz
GB         0
PC         1.00
  
```



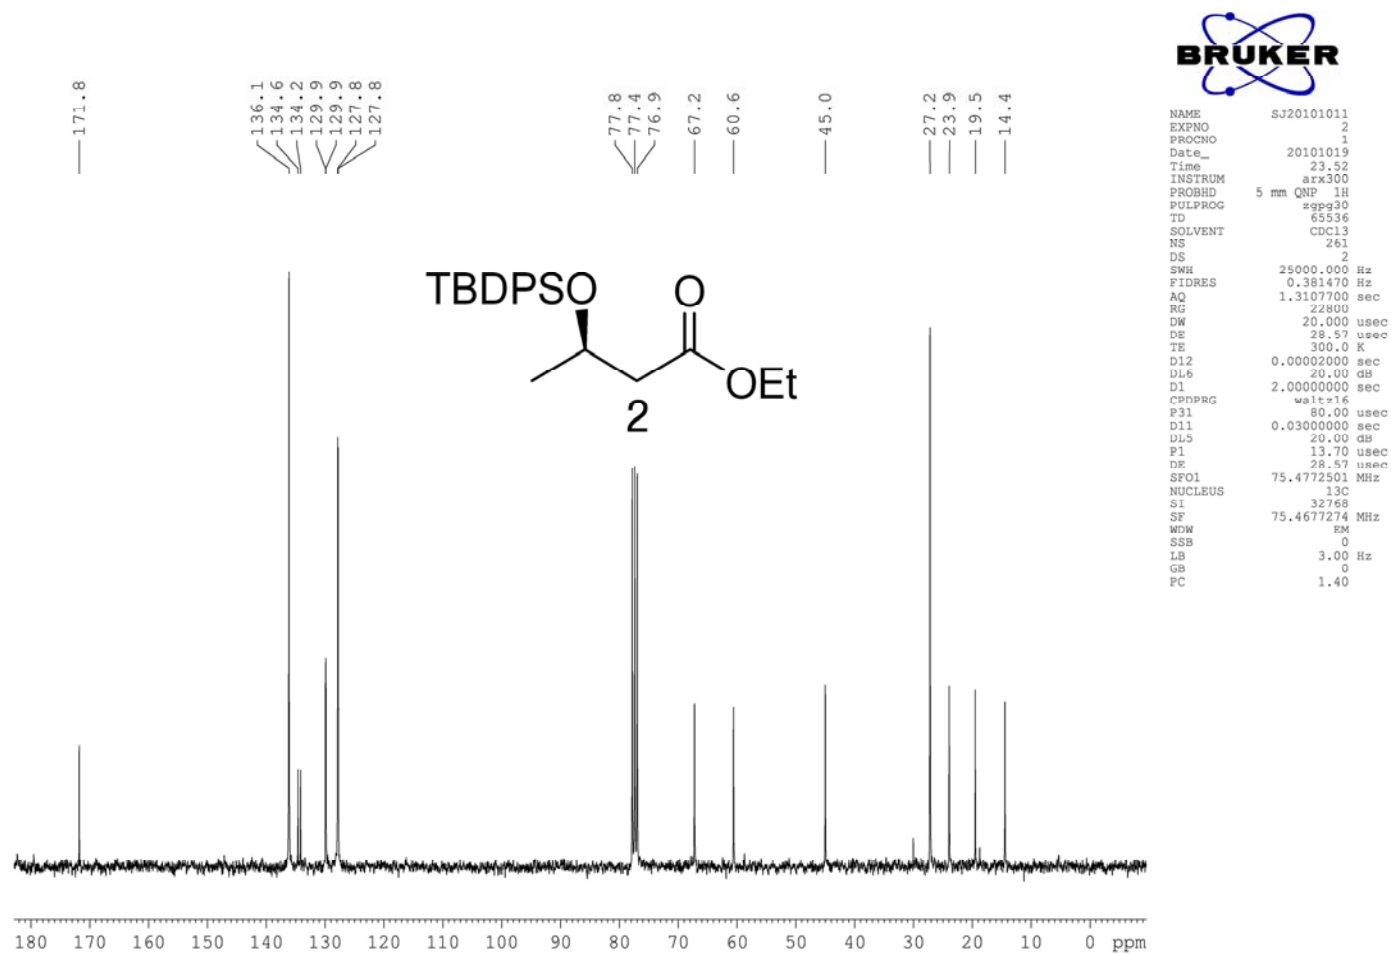

Sample:

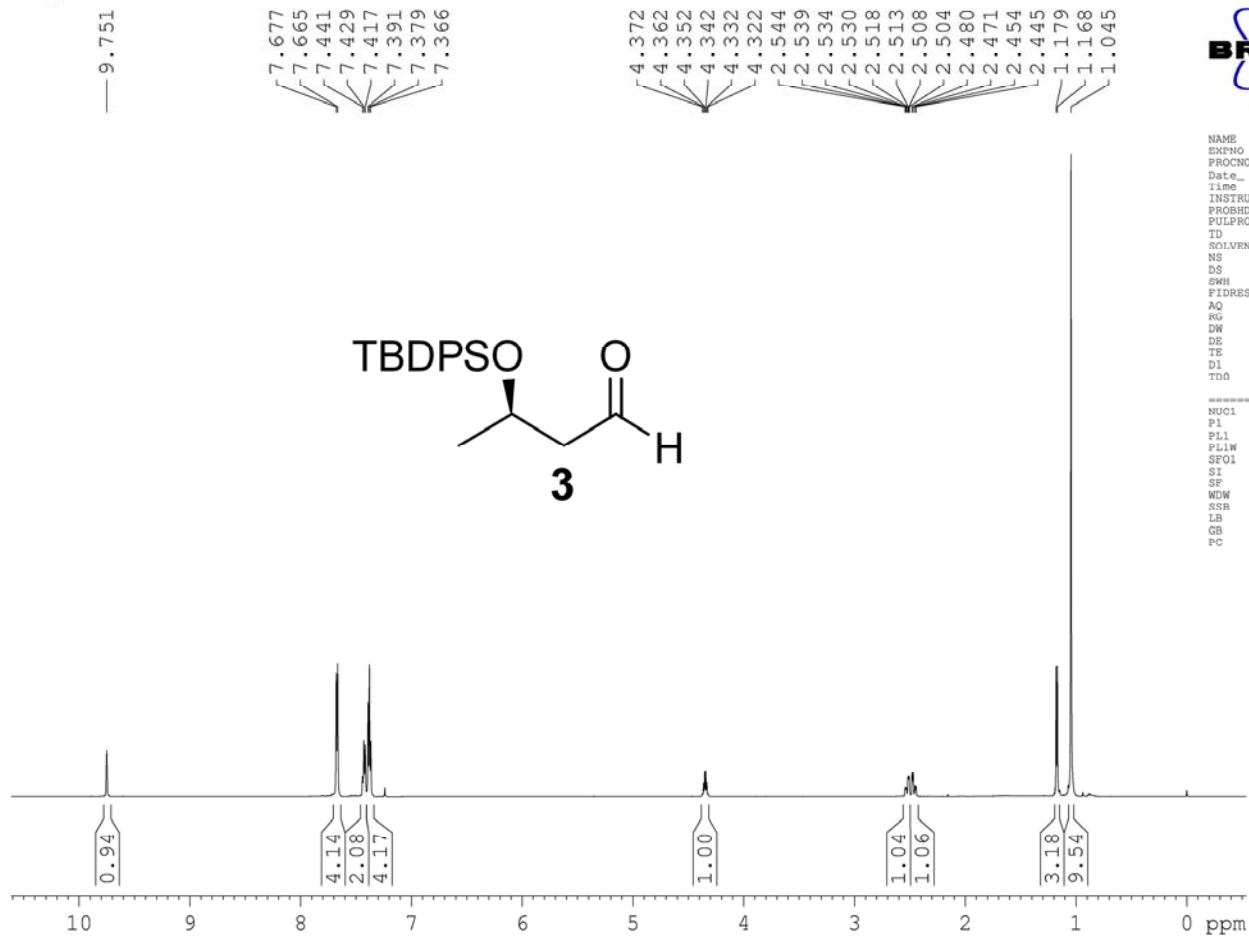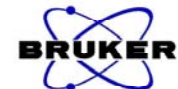

```

NAME          SJ20101018
EXPNO         1
PROCNO        1
Date_         20101019
Time          14.48
INSTRUM       spect
PROBHD        5 mm PABBO BB-
PULPROG       zg30
TD            65536
SOLVENT       CDCl3
NS            8
DS            2
SWH           12019.230 Hz
FIDRES        0.183399 Hz
AQ            2.7263892 sec
RG            40.3
DW            41.600 usec
DE            6.50 usec
TE            298.2 K
D1            1.00000000 sec
TD0           1

===== CHANNEL f1 =====
NUC1          1H
P1            11.10 usec
PL1           -4.00 dB
PL1W          34.70265579 W
SFO1          600.1336008 MHz
SI            32768
SF            600.1300221 MHz
WDW           EM
SSR           0
LB            0.30 Hz
GB            0
PC            1.00

```

Chemical structure of compound **3** is shown above the spectrum. The structure is a 1,2-diol derivative with a TBDPSO group and an aldehyde group.

The <sup>13</sup>C NMR spectrum (CDCl<sub>3</sub>) shows the following peaks (ppm):

- 201.9
- 135.8
- 134.0
- 133.5
- 129.8
- 129.7
- 127.7
- 127.5
- 77.2
- 77.0
- 76.8
- 65.6
- 52.7
- 26.9
- 23.8
- 19.1

The spectrum displays a series of peaks corresponding to the carbon atoms in the molecule, with the aldehyde carbonyl appearing at the highest chemical shift (201.9 ppm) and the aliphatic carbons appearing at lower chemical shifts (19.1 to 65.6 ppm).

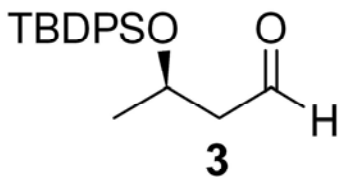

```

NAME                SJ20101018
EXPNO                2
PROCNO              1
Date_               20101019
Time                14.56
INSTRUM             spect
PROBHD              5 mm PABBO BB
PULPROG             zgpg30
TD                  65536
SOLVENT             CDCl3
NS                   59
DS                   2
SWH                 45454.547 Hz
FIDRES              0.693581 Hz
AQ                  0.7209570 sec
RG                   20600
DE                   11.000 usec
DW                   6.50 usec
TE                  298.2 K
D1                   2.00000000 sec
D11                  0.03000000 sec
TD0                  1
=====
NUC1                  13C
F1                     6.00 usec
PL1                     1.00 dB
PL1W                   83.20243835 W
SFO1                   150.9178993 MHz
=====
CHANNEL f2
=====
CDPDRG2              wait12h
NUC2                   1H
PCPD2                  8.00 usec
PL2                     -4.00 dB
PL12                   13.16 dB
PL13                   16.00 dB
PL2W                   34.70265579 W
PL12W                  0.66736388 W
F12W                   34.702653 W
SFO2                   600.1324005 MHz
SI                      32768
SF1                    150.9028165 MHz
WDW                     EM
SSB                     0
Lb                      3.00 Hz
GB                       0
PC                       1.40

```

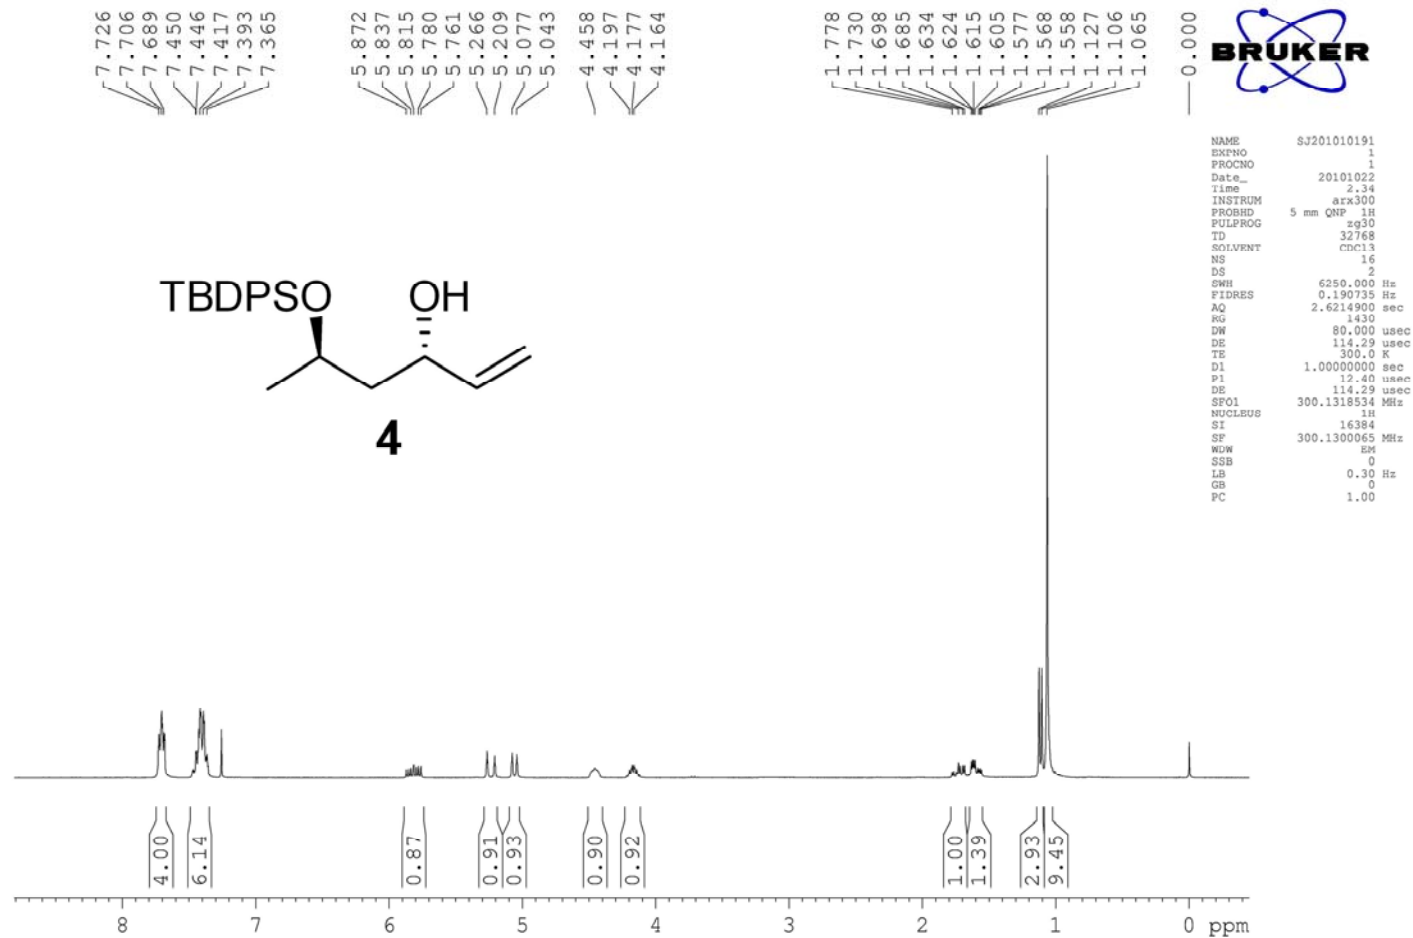

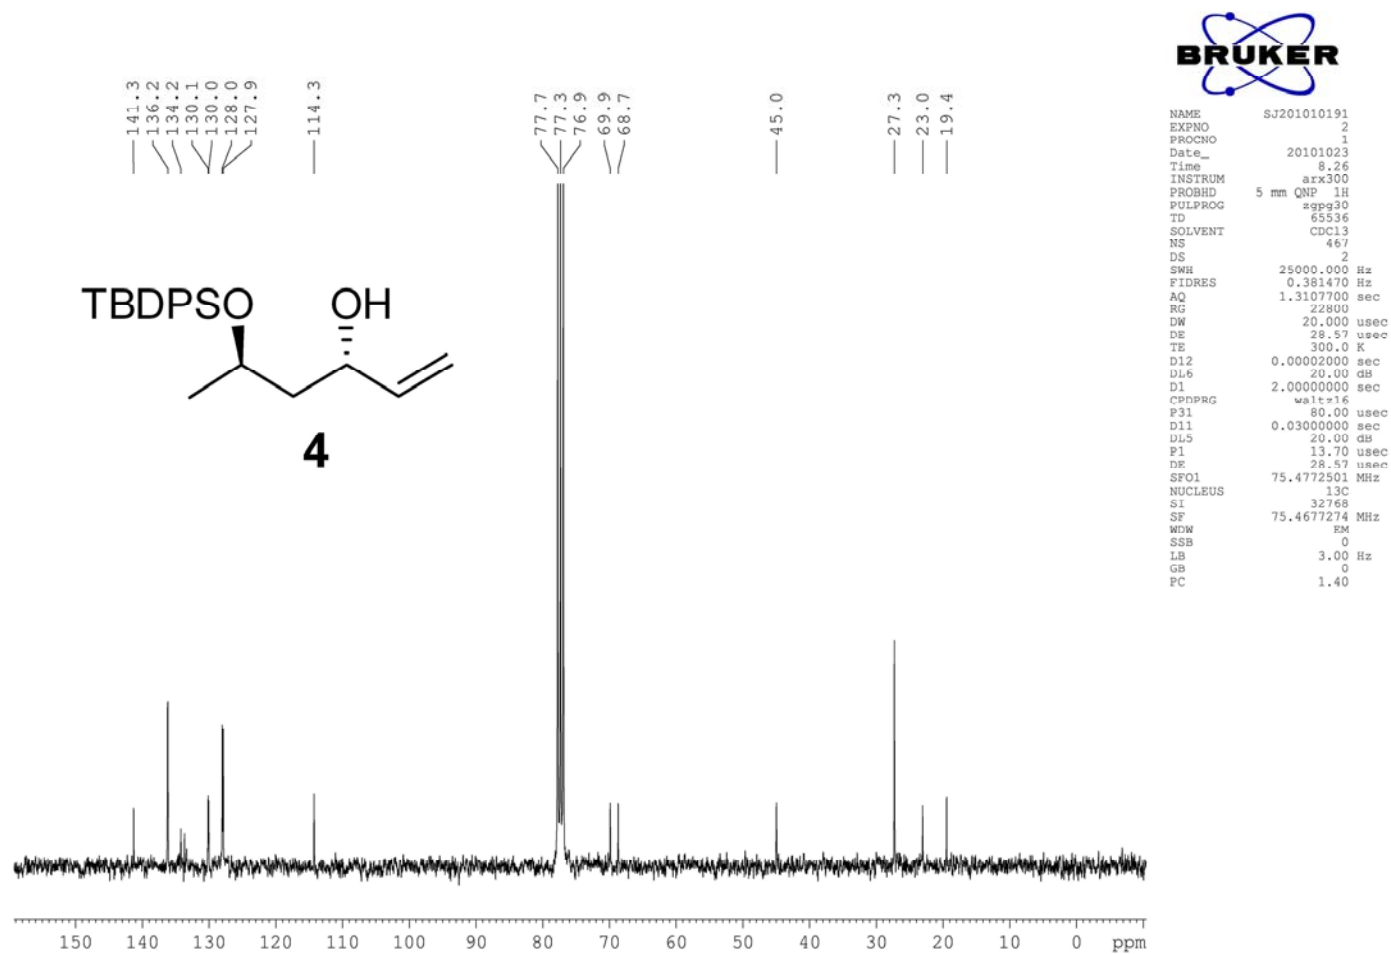

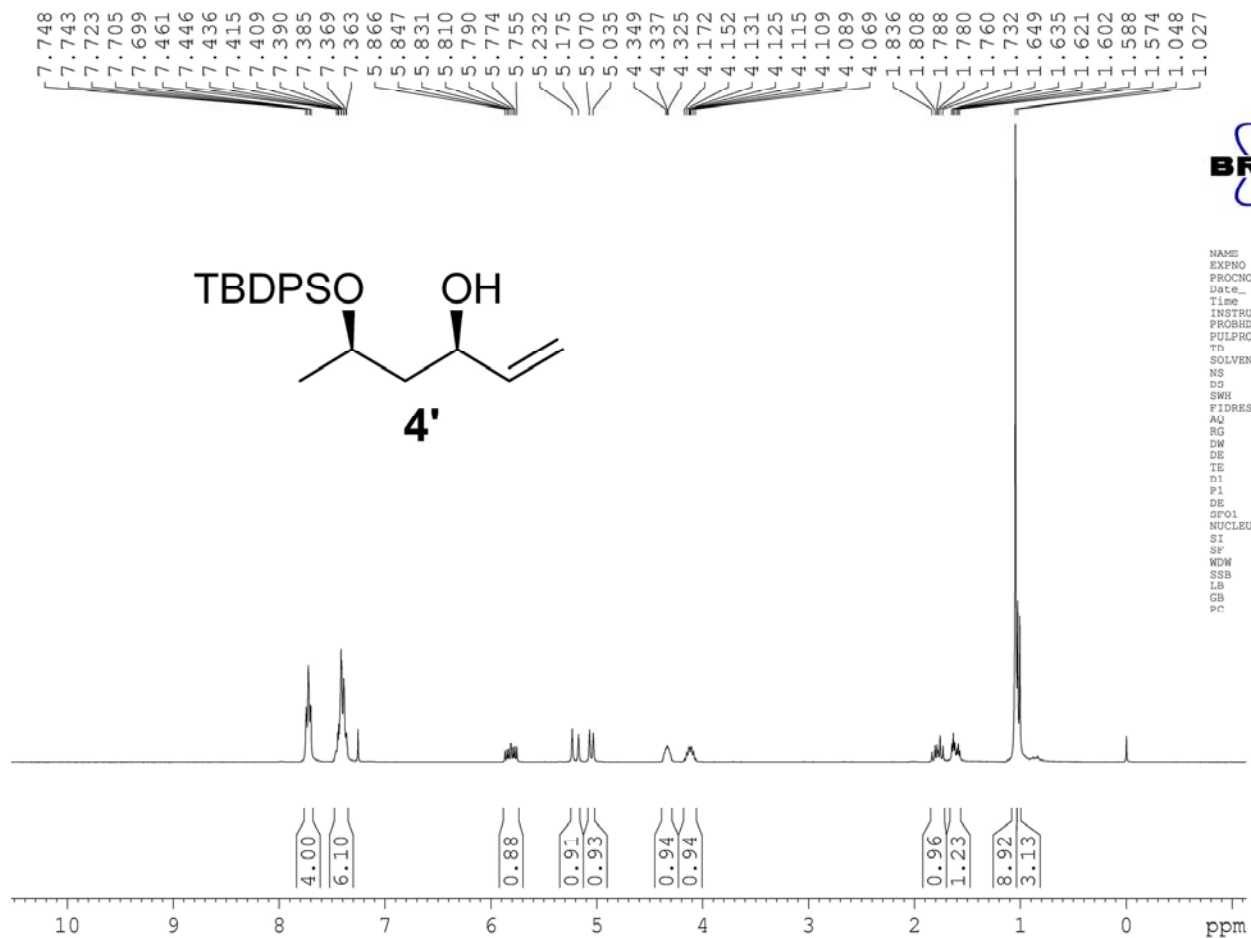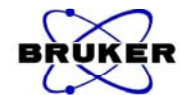

```

NAME      GJ201010192
EXPNO     1
PROCNO    1
Date_     20101022
Time      2.30
INSTRUM   spect
PROBHD    5 mm QNP
PULPROG   zg30
TD         32768
SOLVENT   CDCl3
NS         16
DS         2
SWH        6250.000 Hz
FIDRES     0.190735 Hz
AQ         2.6214900 sec
RG         1024
DW         80.000 usec
DE         114.29 usec
TE         300.0 K
n1         1.00000000 sec
F1         12.40 usec
DE         114.29 usec
SFO1       300.1310534 MHz
NUCLEUS    1H
SI         16384
SF         300.1300073 MHz
WDW        EM
SSB        0
LB         0.30 Hz
GB         0
PC         1.00
  
```

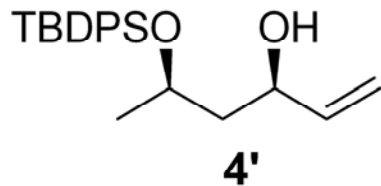

4'



|         |                |
|---------|----------------|
| NAME    | SJ201010192    |
| EXPNO   | 2              |
| PROCNO  | 1              |
| Date_   | 20101023       |
| Time    | 7.42           |
| INSTRUM | arx300         |
| PROBHD  | 5 mm QNP 1H    |
| PULPROG | zgpg30         |
| TD      | 65536          |
| SOLVENT | CDCl3          |
| NS      | 738            |
| DS      | 2              |
| SWH     | 25000.000 Hz   |
| FIDRES  | 0.381470 Hz    |
| AQ      | 1.3107700 sec  |
| RG      | 22800          |
| DW      | 20.000 usec    |
| DE      | 28.57 usec     |
| TE      | 300.0 K        |
| D12     | 0.00002000 sec |
| D11     | 20.00 usec     |
| D1      | 2.00000000 sec |
| CPDPRG  | waltz16        |
| F31     | 80.00 usec     |
| D11     | 0.03000000 sec |
| D1      | 20.00 usec     |
| P1      | 13.70 usec     |
| DE      | 28.57 usec     |
| SFO1    | 75.4772501 MHz |
| NUCLEUS | 13C            |
| SI      | 32768          |
| SF      | 75.4677274 MHz |
| WWDW    | EM             |
| SSB     | 0              |
| LB      | 3.00 Hz        |
| GB      | 0              |
| PC      | 1.40           |

Sample:

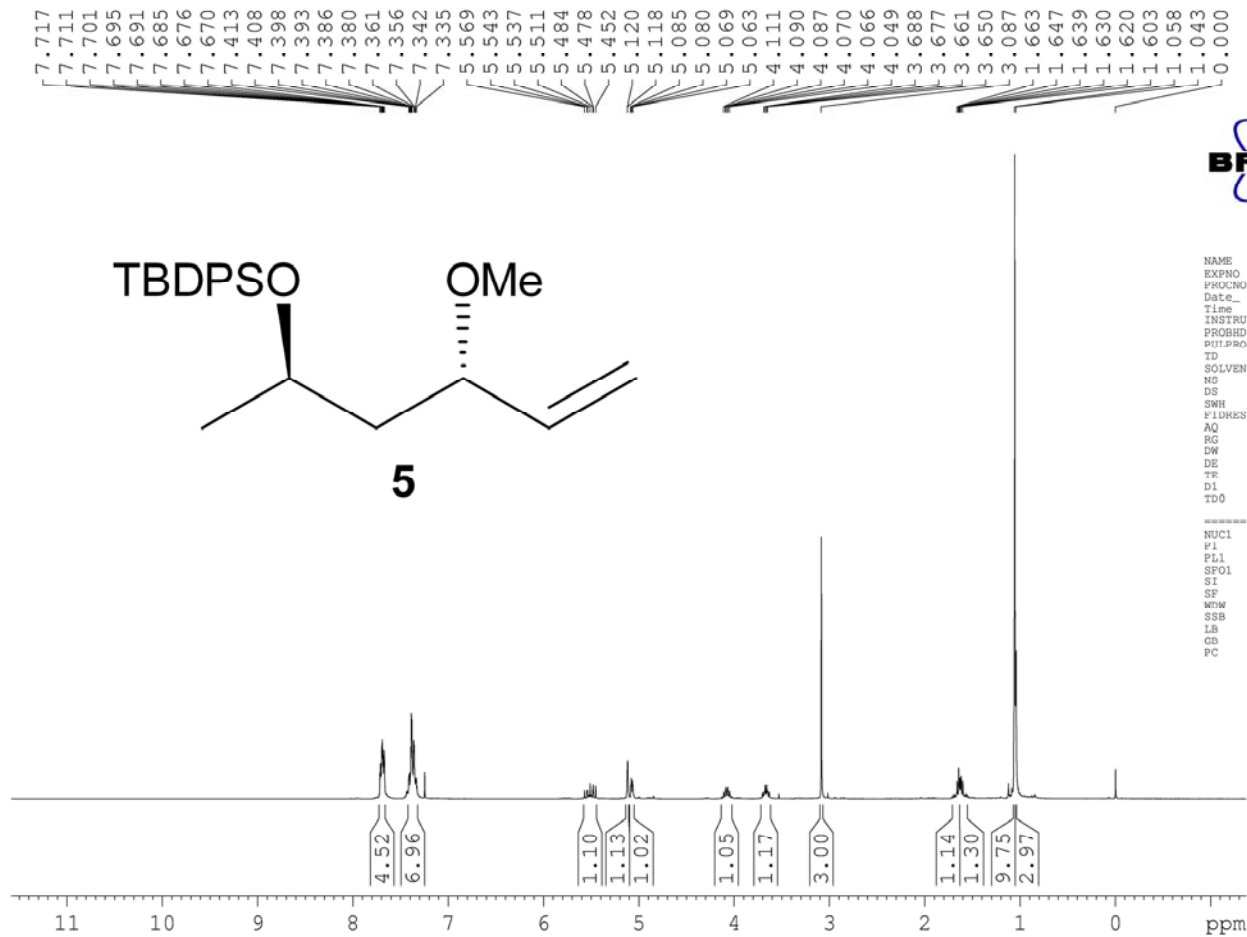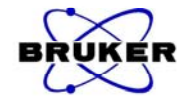

```

NAME      SJ20120228
EXPNO     1
PROCNO    1
Date_     20120301
Time      13.49
INSTRUM    spect
PROBHD     5 mm QNP 1H/13
PULPROG    zg30
TD         65536
SOLVENT    CDCl3
NS         16
DS         2
SWH         6172.839 Hz
FIDRES     0.094190 Hz
AQ         5.3084660 sec
RG         228.1
DW         81.000 usec
DE         6.50 usec
TE         673.2 K
DL         1.00000000 sec
TD0        1

===== CHANNEL f1 =====
NUC1       1H
P1         10.00 usec
PL1        1.00 dB
SFO1       300.1318534 MHz
SI         32768
SF         300.1300103 MHz
WDW        RM
SSB        0
LB         0.30 Hz
GB         0
PC         1.00
  
```



AV-600-13C  
Sample:

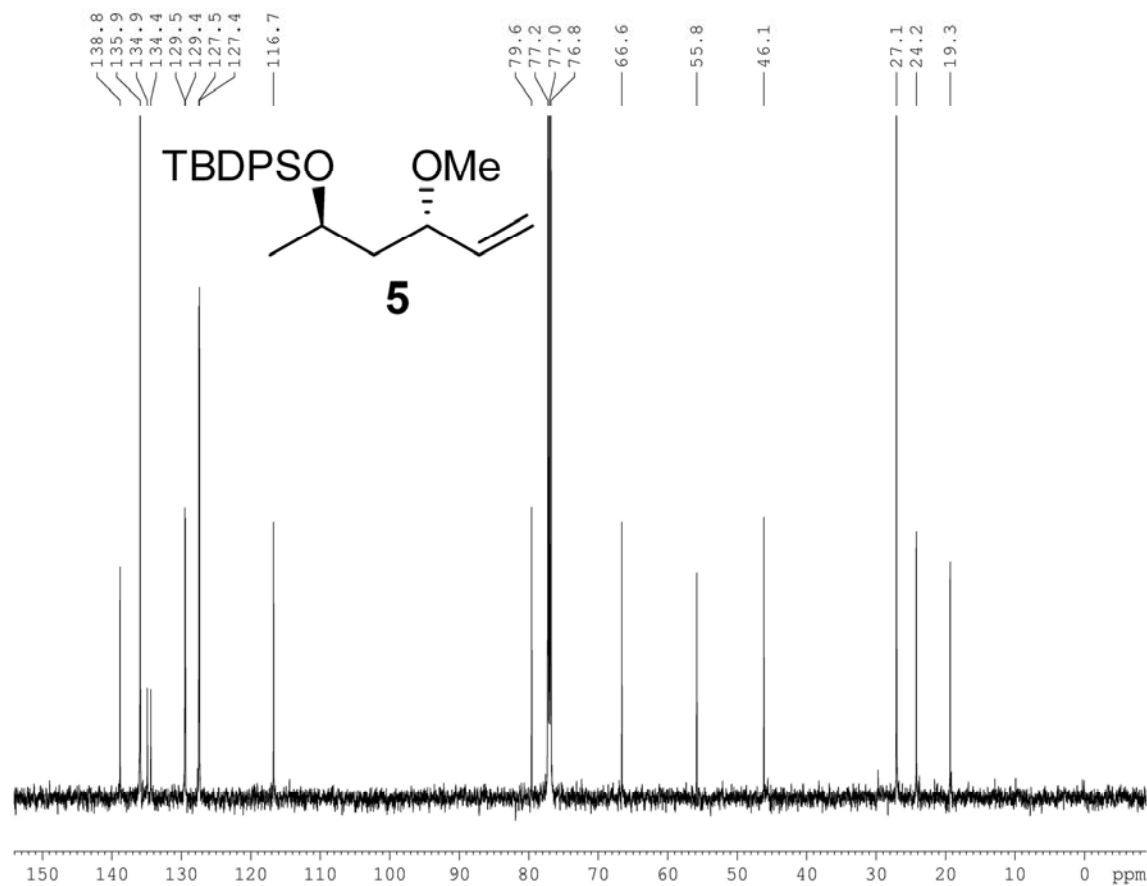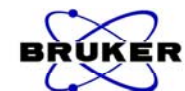

```

NAME      SJ20120228
EXPNO     2
PROCNO    1
Date_     20120302
Time      8.43
INSTRUM    spect
PROBHD     5 mm PABBO BB-
PULPROG    zgpg30
TD         65536
SOLVENT    CDCl3
NS         176
DS         2
SWH         45454.547 Hz
FIDRES     0.693581 Hz
AQ         0.7209570 sec
RG         20600
DW         11.000 usec
DE         6.50 usec
TE         298.2 K
D1         2.00000000 sec
D11        0.03000000 sec
TD0        1

===== CHANNEL f1 =====
NUC1       13C
P1         6.00 usec
PL1        1.00 dB
PL1W       83.20243835 W
SFO1       150.9178993 MHz

===== CHANNEL f2 =====
CPDPRG2    waltz16
NUC2       1H
PCPD2      80.00 usec
PL2        -4.00 dB
PL12       13.16 dB
PL13       16.00 dB
PL2W       34.70265579 W
PL12W      0.66736388 W
PL13W      0.34702653 W
SFO2       600.1324005 MHz
SI         32768
SF         150.9028090 MHz
WDW        EM
SSB        0
LB         3.00 Hz
GB         0
PC         1.40

```



AV-600-13C  
Sample:

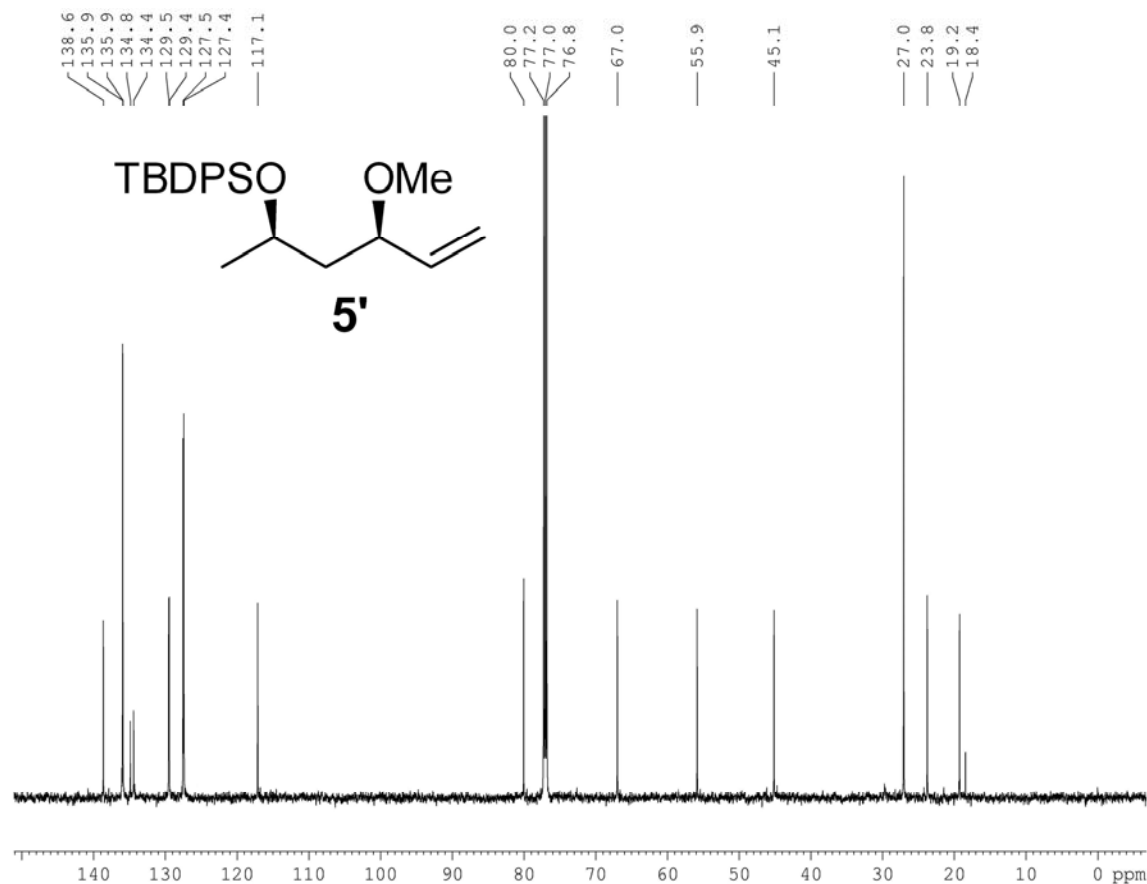

```

NAME      SJ20120225
EXPNO     2
PROCNO    1
Date_     20120228
Time      8.28
INSTRUM    spect
PROBHD     5 mm PABBO BB-
PULPROG    zgpg30
TD         65536
SOLVENT    CDCl3
NS         133
DS         2
SWH        45454.547 Hz
FIDRES     0.693581 Hz
AQ         0.7209570 sec
RG         20600
DW         11.000 usec
DE         6.50 usec
TE         298.2 K
D1         2.00000000 sec
D11        0.03000000 sec
TD0        1

===== CHANNEL f1 =====
NUC1       13C
P1         6.00 usec
PL1        1.00 dB
PL1W       83.20243835 W
SFO1       150.9178993 MHz

===== CHANNEL f2 =====
CPDPRG2    waltz16
NUC2       1H
PCPD2      80.00 usec
PL2        -4.00 dB
PL12       13.16 dB
PL13       16.00 dB
PL2W       34.70265579 W
PL12W      0.66736388 W
PL13W      0.34702653 W
SFO2       600.1324005 MHz
SI         32768
SF         150.9028090 MHz
WDW        EM
SSB        0
LB         3.00 Hz
GB         0
PC         1.40
  
```

Sample:

7.725  
7.720  
7.713  
7.707  
7.700  
7.694  
7.689  
7.670  
7.664  
7.657  
7.400  
7.392  
7.378  
7.366

4.055  
4.034  
4.014  
3.994  
3.543  
3.539  
3.531  
3.448  
3.443  
3.436  
3.425  
3.420  
3.408  
3.394  
3.384  
3.369  
3.234  
3.218  
1.810  
1.762  
1.722  
1.650  
1.624  
1.601  
1.578  
1.108  
1.088  
1.051  
— 0.000

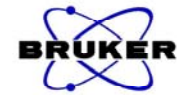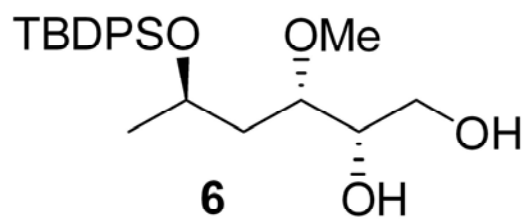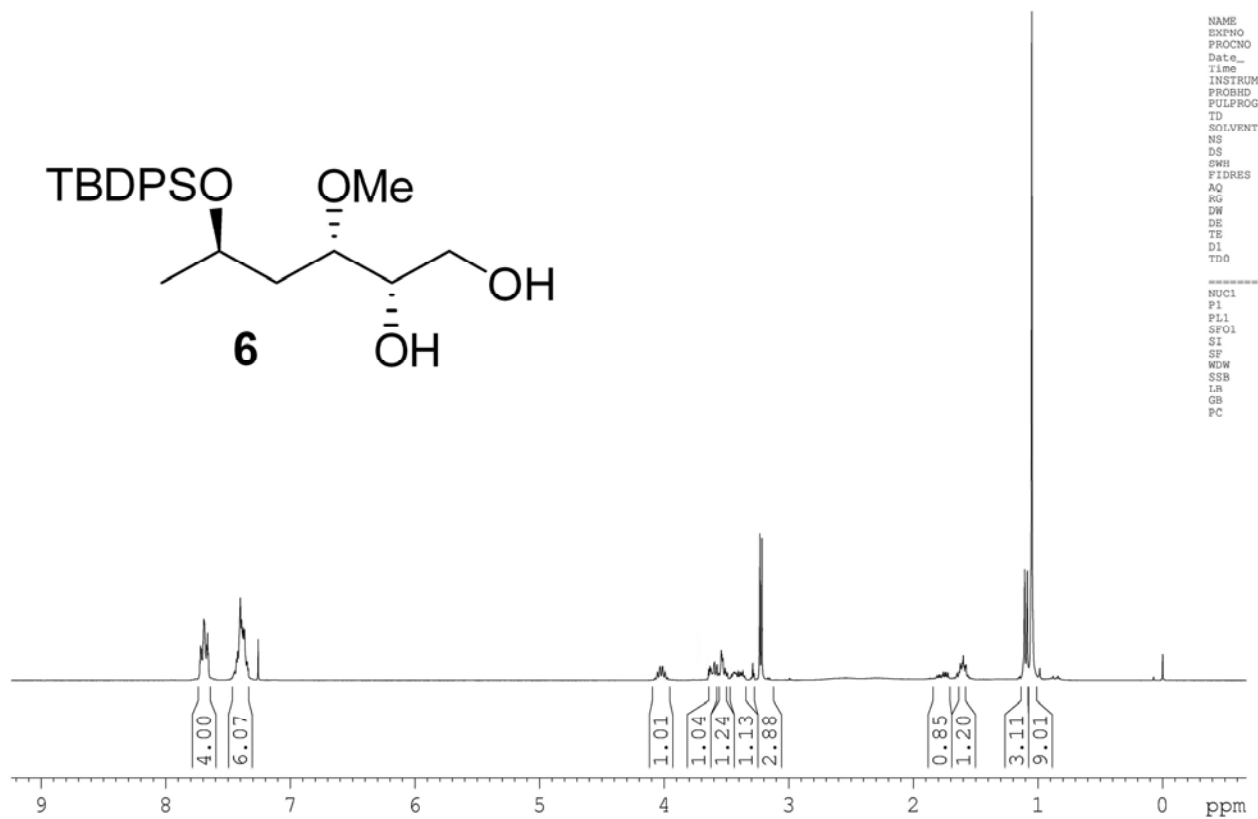

```

NAME      SJ20120510
EXPNO     1
PROCNO    1
Date_     20120511
Time      16.45
INSTRUM   spect
PROBHD    5 mm QNP 1H/13
PULPROG   zg30
TD         65536
SOLVENT   CDCl3
NS         16
DS         2
SWH        6172.839 Hz
FIDRES     0.094190 Hz
AQ         5.3084660 sec
RG         228.1
DW         81.000 usec
DE         6.50 usec
TE         673.2 K
D1         1.00000000 sec
TD0        1

===== CHANNEL f1 =====
NUC1       1H
P1         10.80 usec
PL1        1.00 dB
SFO1       300.1318534 MHz
SI         32768
SF         300.1300069 MHz
WDW        EM
SSB        0
LB         0.30 Hz
GB         0
PC         1.00
  
```

AV-600-13C  
Sample:

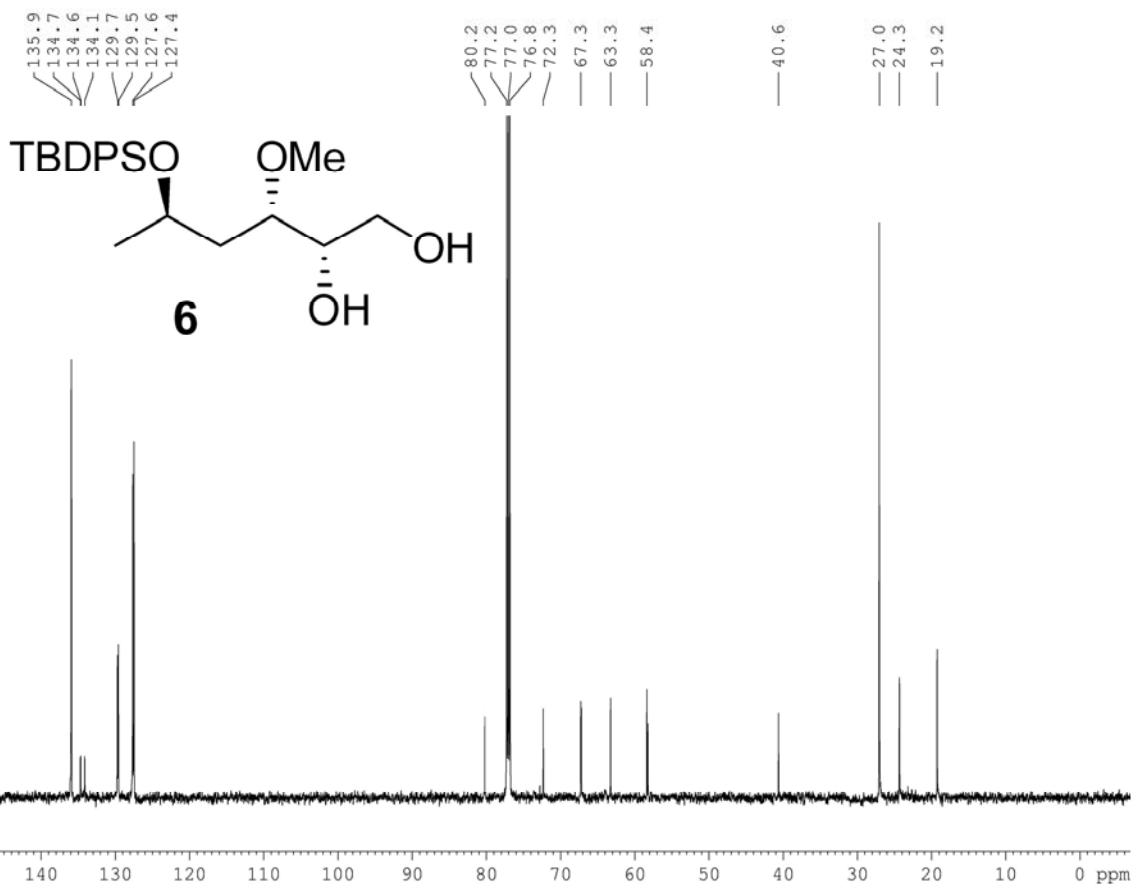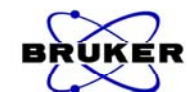

```

NAME      SJ20120510
EXPNO     2
PROCNO    1
Date_     20120522
Time      9.35
INSTRUM   spect
PROBHD    5 mm PABBO BB-
PULPROG   zgpg30
TD        65536
SOLVENT   CDCl3
NS        209
DS        2
SWH       45454.547 Hz
FIDRES    0.693581 Hz
AQ        0.7209570 sec
RG        20600
DW        11.000 usec
DE        6.50 usec
TE        298.2 K
D1        2.00000000 sec
D11       0.03000000 sec
TD0       1

===== CHANNEL f1 =====
NUC1      13C
P1        6.00 usec
PL1       1.00 dB
PL1W      83.20243835 W
SF01      150.9178993 MHz

===== CHANNEL f2 =====
CPDPRG2   waltz16
NUC2      1H
PCPD2     80.00 usec
PL2       -4.00 dB
PL12      13.16 dB
PL13      16.00 dB
PL2W      34.70265579 W
PL12W     0.66736388 W
PL13W     0.34702653 W
SFO2      600.1324005 MHz
SI        32768
SF        150.9028090 MHz
WDW       EM
SSB       0
LB        3.00 Hz
GB        0
PC        1.40

```

Sample:   
 7.695   
 7.690   
 7.678   
 7.430   
 7.399   
 7.375   
 7.357

4.078   
 4.059   
 4.039   
 4.019   
 3.630   
 3.622   
 3.462   
 3.382   
 3.368   
 3.351   
 3.287   
 1.863   
 1.844   
 1.834   
 1.815   
 1.796   
 1.649   
 1.629   
 1.609   
 1.601   
 1.581   
 1.561   
 1.113   
 1.058   
 1.051

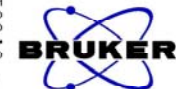

NAME SJ2012-1023   
 EXPNO 1   
 PROCNO 1   
 Date\_ 20121030   
 Time 8.56   
 INSTRUM spect   
 PROBHD 5 mm QNP 1H/13   
 PULPROG zg30   
 TD 65536   
 SOLVENT CDCl3   
 NS 16   
 DS 2   
 SWH 6172.839 Hz   
 FIDRES 0.094190 Hz   
 AQ 5.3084660 sec   
 RG 256   
 DW 81.000 usec   
 DE 6.50 usec   
 TE 673.2 K   
 D1 1.00000000 sec   
 TDO 1   
 ===== CHANNEL f1 =====   
 NUC1 1H   
 P1 10.80 usec   
 PL1 1.00 dB   
 SFO1 300.1318534 MHz   
 SI 32768   
 SF 300.1300074 MHz   
 WDW EM   
 SSB 0   
 LB 0.30 Hz   
 GB 0   
 PC 1.00

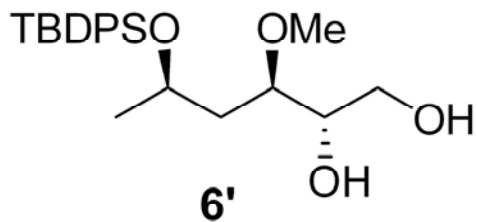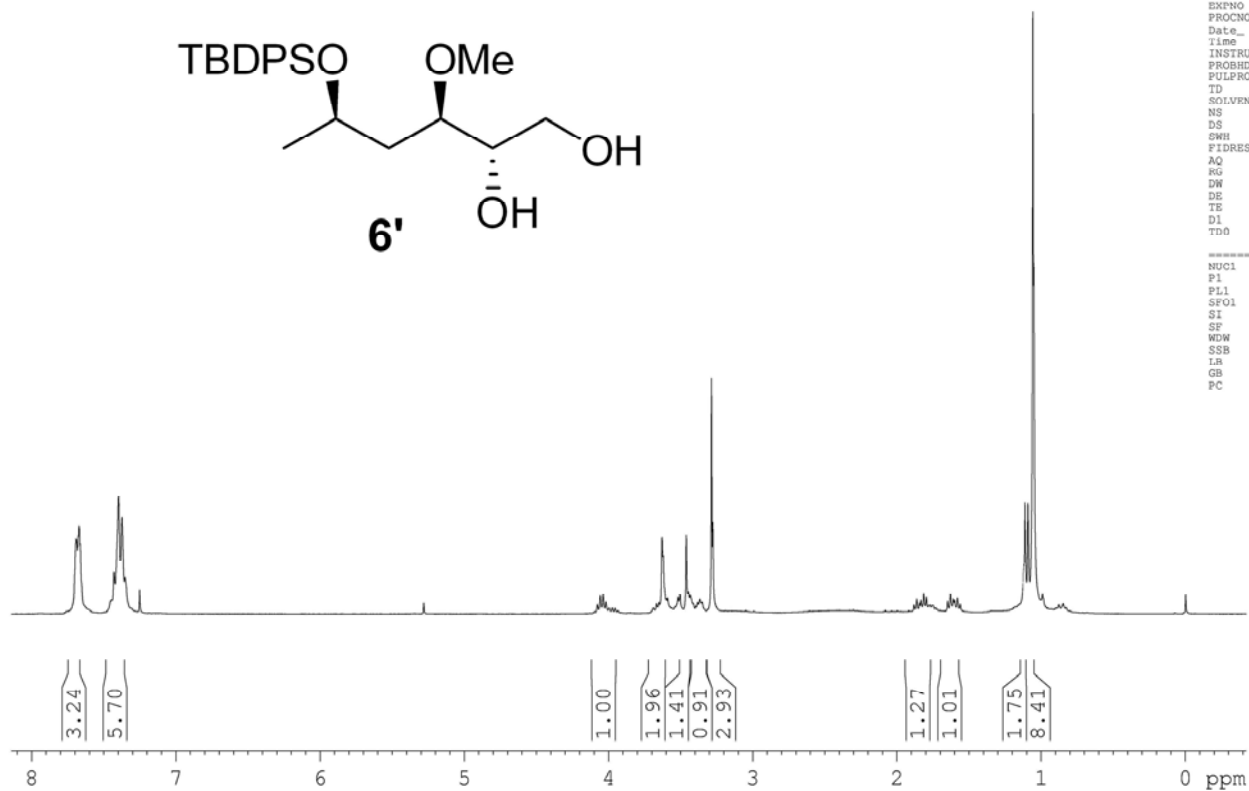

AV-600-13C  
Sample:

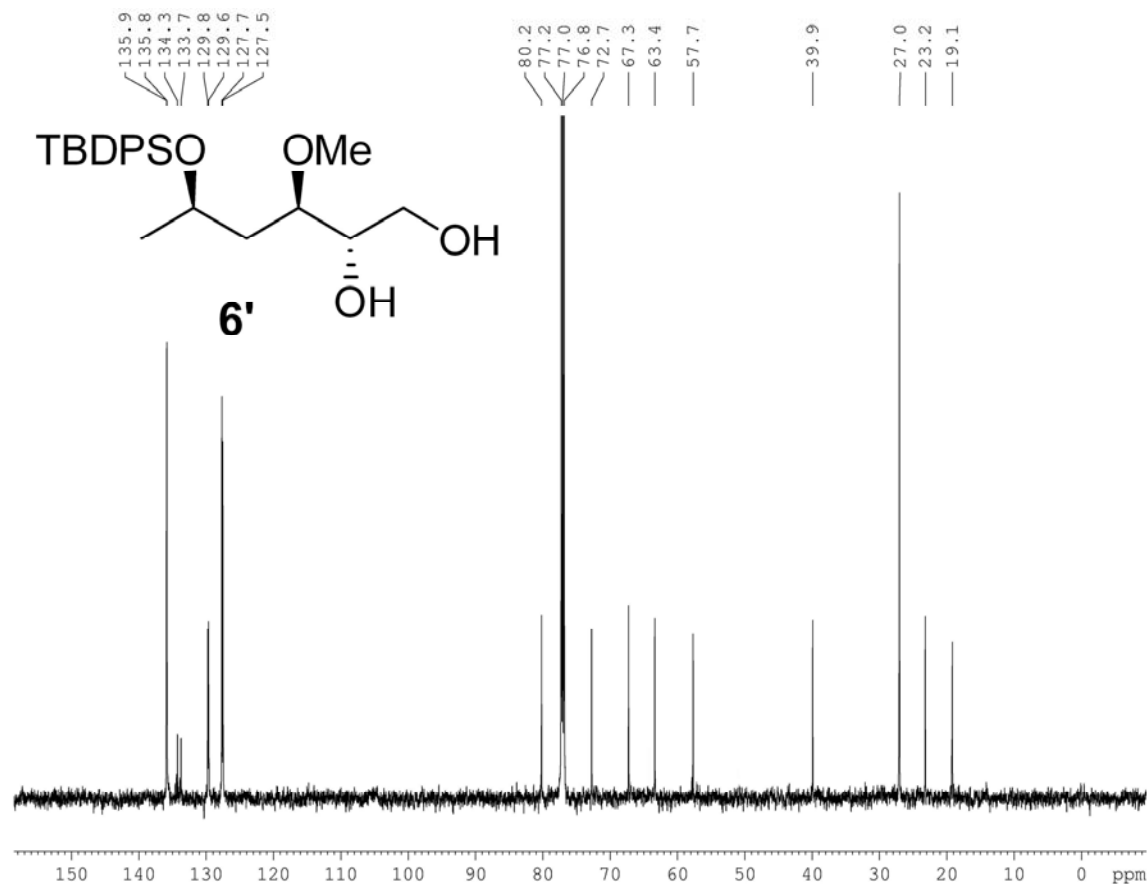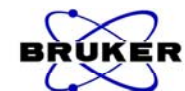

```

NAME      SJ2012-1023
EXPNO     2
PROCNO    1
Date_     20121030
Time      16.11
INSTRUM   spect
PROBHD    5 mm PABBO BB-
PULPROG   zgpg30
TD         65536
SOLVENT   CDCl3
NS         137
DS         2
SWH        45454.547 Hz
FIDRES     0.693581 Hz
AQ         0.7209570 sec
RG         20600
DW         11.000 usec
DE         6.50 usec
TE         298.2 K
D1         2.00000000 sec
D11        0.03000000 sec
TD0        1

===== CHANNEL f1 =====
NUC1       13C
P1         6.00 usec
PL1        1.00 dB
PL1W       83.20243835 W
SFO1       150.9178993 MHz

===== CHANNEL f2 =====
CPDPRG2    waltz16
NUC2       1H
PCPD2      80.00 usec
PL2        -4.00 dB
PL12       13.16 dB
PL13       16.00 dB
PL2W       34.70265579 W
PL12W      0.66736388 W
PL13W      0.34702653 W
SFO2       600.1324005 MHz
SI         32768
SF         150.9028090 MHz
WDW        EM
SSB        0
LB         3.00 Hz
GB         0
PC         1.40

```

Sample:

7.736  
7.711  
7.688  
7.414  
7.389  
7.384  
7.364  
7.257

4.122  
4.112  
4.103  
4.093  
4.083  
3.820  
3.809  
3.795  
3.773  
3.767  
3.749  
3.715  
3.703  
3.555  
3.551  
3.544  
3.537  
3.265  
1.870  
1.862  
1.839  
1.831  
1.822  
1.815  
1.792  
1.784  
1.629  
1.622  
1.600  
1.593  
1.571  
1.560  
1.537  
1.527  
1.055  
0.910  
0.897  
0.103  
0.061

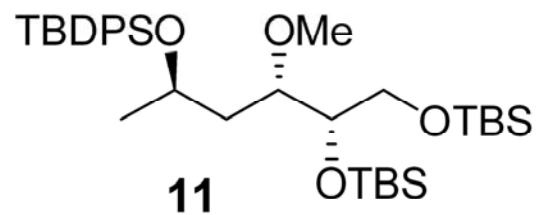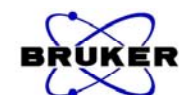

NAME SJ201205213  
EXPNO 1  
PROCNO 1  
Date\_ 20120523  
Time 14.29  
INSTRUM spect  
PROBHD 5 mm QNP 1H/13  
PULPROG zg30  
TD 65536  
SOLVENT CDCl3  
NS 16  
DS 2  
SWH 6172.839 Hz  
FIDRES 0.094190 Hz  
AQ 5.3084660 sec  
RG 114  
DW 81.000 usec  
DE 6.50 usec  
TE 673.2 K  
D1 1.00000000 sec  
ID0 1

===== CHANNEL f1 =====  
NUC1 1H  
P1 10.80 usec  
PL1 1.00 dB  
SFO1 300.1318534 MHz  
SI 32768  
SF 300.1300073 MHz  
WDW EM  
SSB 0  
LB 0.30 Hz  
GB 0  
PC 1.00

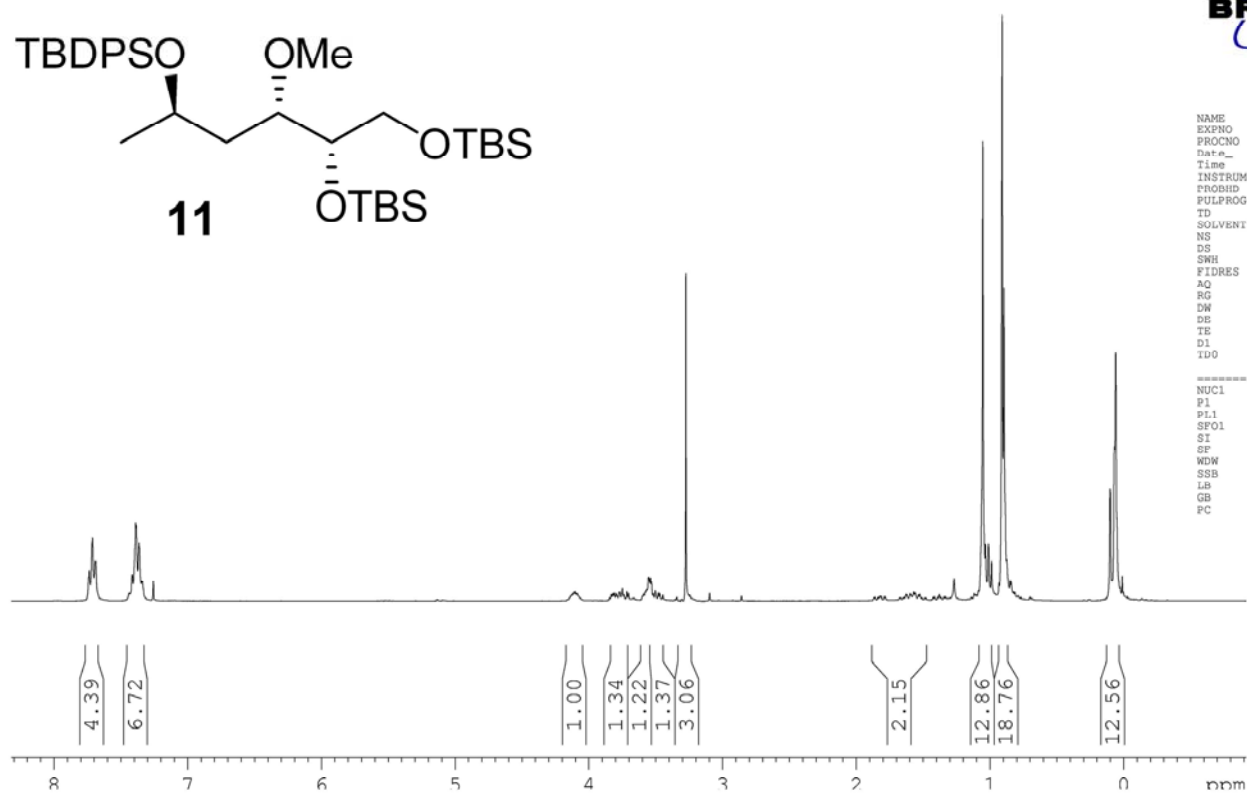



Chemical structure of compound **11** is shown above the spectrum. The structure is a 1,3-diol derivative with a TBDPSO group, a methyl group, and two OTBS groups.

**13C NMR Spectrum Data (ppm):**

| Chemical Shift (ppm) |
|----------------------|
| 135.9                |
| 135.3                |
| 134.3                |
| 129.5                |
| 129.3                |
| 127.5                |
| 127.3                |
| 78.8                 |
| 77.4                 |
| 77.0                 |
| 76.6                 |
| 74.8                 |
| 67.1                 |
| 64.3                 |
| 57.8                 |
| 41.2                 |
| 27.1                 |
| 26.0                 |
| 25.9                 |
| 19.3                 |
| 18.2                 |
| -4.2                 |
| -4.5                 |
| -4.8                 |
| -5.4                 |

C[C@H](C(C)C)[C@@H](OC(=O)c1ccc(O[Si](C)(C)C)cc1)[C@H](OC(=O)c1ccc(O[Si](C)(C)C)cc1)CC(C)C

**11**



```

NAME                SJ201205213
EXPNO                2
PROCNO              1
Date_               20120529
Time                15.51
INSTRUM             aspect
PROBHD              5 mm QNP 1H/13
PULPROG             zgpg30
TD                  65536
SOLVENT             CDCl3
NS                   183
DS                   4
SWH                 22675.736 Hz
FIDRES              0.3460004 Hz
AQ                  1.4451188 sec
RG                  3649.1
DW                  22.050 usec
DE                   6.50 usec
TE                  673.2 K
D1                  2.00000000 sec
D11                 0.03000000 sec
TDO                  1
===== CHANNEL f1 =====
NUC1                 13C
P1                   14.00 usec
PL1                  2.00 dB
SFO1                 75.4752953 MHz

===== CHANNEL f2 =====
COPROGR2           waltz16
NUC2                 1H
PCPD2               90.00 usec
PL2                  2.00 dB
PL12                 20.00 dB
PL13                 20.00 dB
SFO2                 300.1312005 MHz
SI                   32768
SF                   75.4677490 MHz
WDW                  EM
SSB                  0
LB                   0.10 Hz
GB                   0
PC                   1.40

```

Sample:

7.712  
7.698  
7.692  
7.687  
7.673  
7.667  
7.396  
7.390  
7.384  
7.377  
7.358  
7.350  
7.260

4.107  
4.099  
4.087  
4.080  
4.066  
3.760  
3.748  
3.740  
3.729  
3.721  
3.515  
3.496  
3.236  
1.902  
1.889  
1.870  
1.856  
1.842  
1.823  
1.810  
1.608  
1.598  
1.580  
1.571  
1.561  
1.551  
1.523  
1.063  
0.891  
0.885  
0.056  
0.050

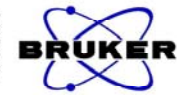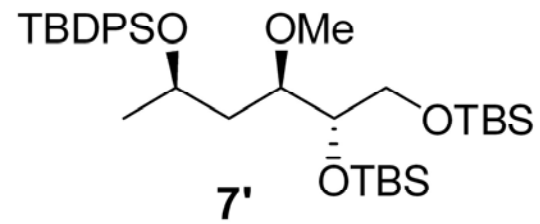

```

NAME      SJ20121123
EXPNO     1
PROCNO    1
Date_     20121126
Time      14.33
INSTRUM   spect
PROBHD    5 mm QNP 1H/13
PULPROG   zg30
TD        65536
SOLVENT   CDCl3
NS         16
DS         2
SWH        6172.839 Hz
FIDRES     0.094190 Hz
AQ         5.3084660 sec
RG         362
DW         81.000 usec
DE         6.50 usec
TE         673.2 K
D1         1.00000000 sec
TD0        1

===== CHANNEL f1 =====
NUC1       1H
P1         10.80 usec
PL1        1.00 dB
SFO1       300.1318534 MHz
SI         32768
SF         300.1300055 MHz
WDW        EM
SSB        0
LB         0.30 Hz
GB         0
PC         1.00
  
```

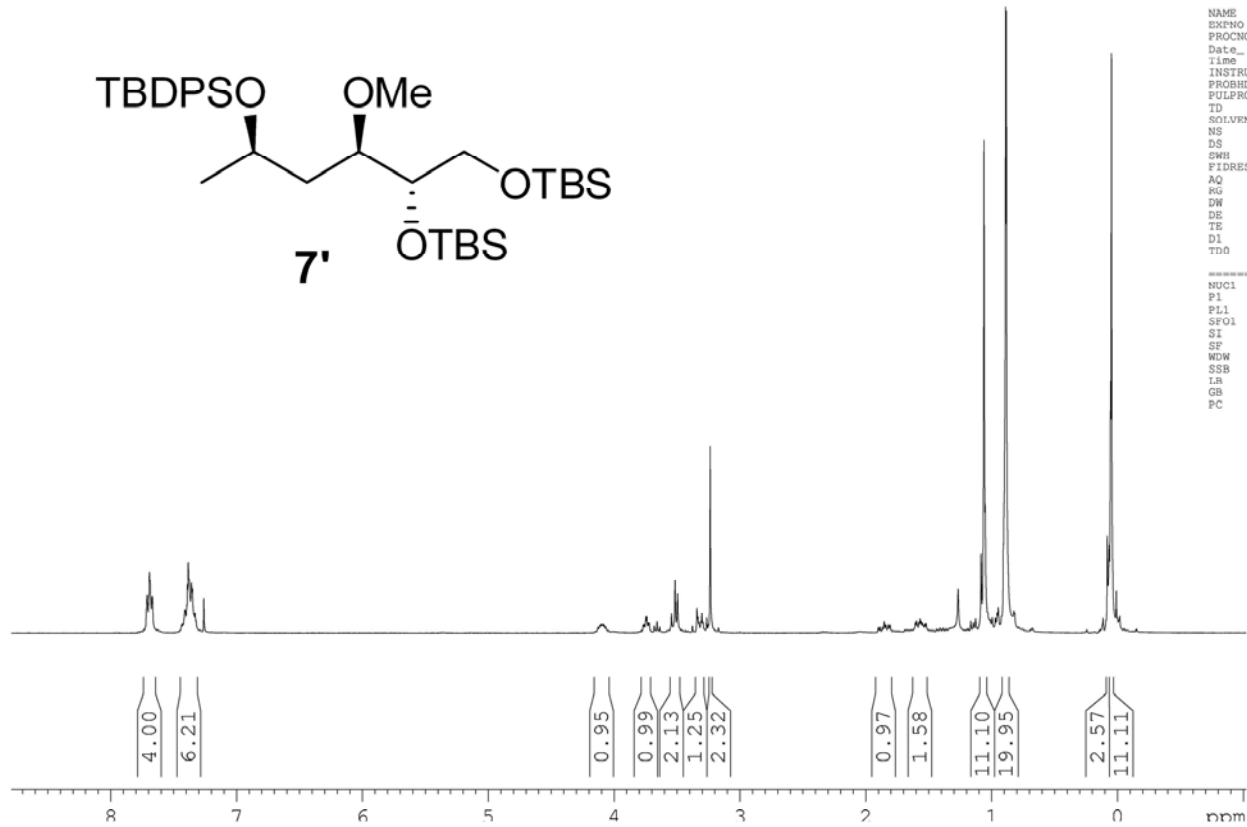

AV-300-13C  
Sample:

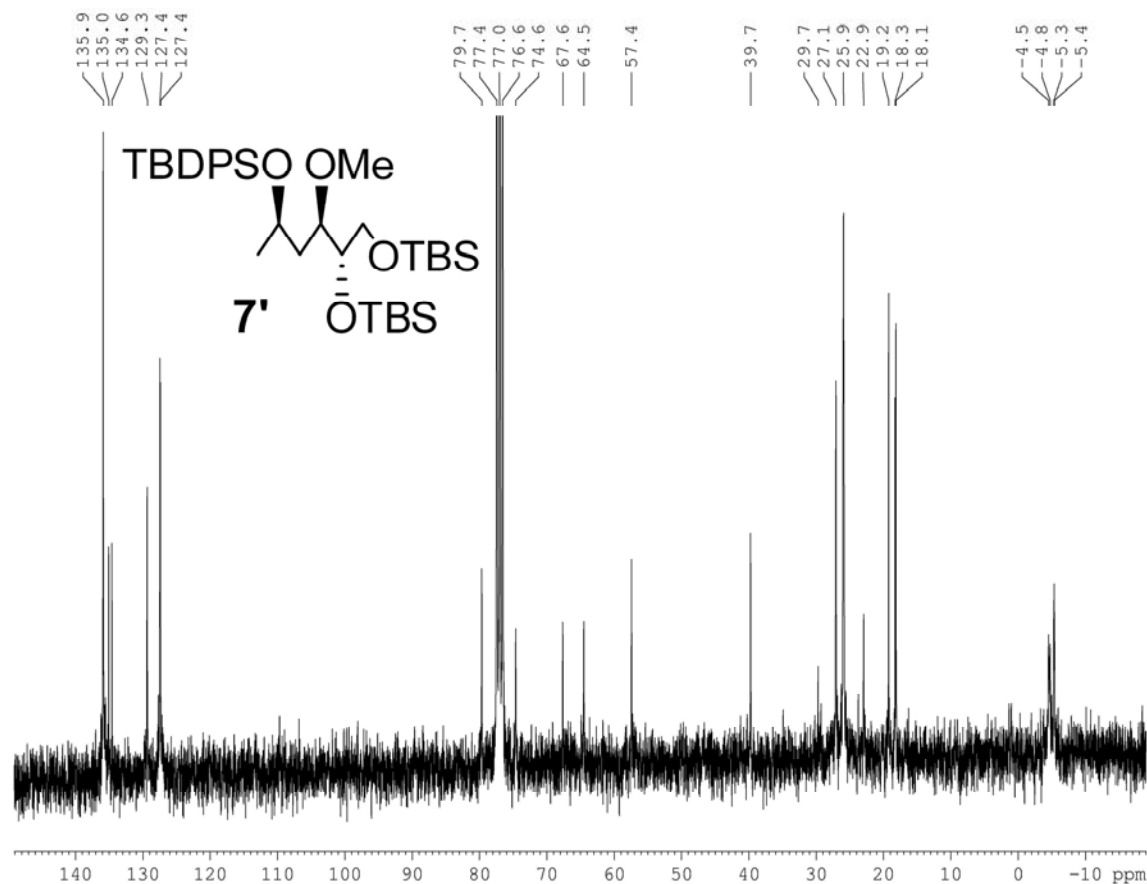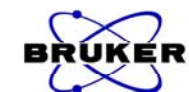

```

NAME      SJ20121123
EXPNO     2
PROCNO    1
Date_     20121128
Time      13.39
INSTRUM    spect
PROBHD     5 mm QNP 1H/13
PULPROG    zgpg30
TD         65536
SOLVENT    CDCl3
NS         2613
DS         4
SWH        22675.736 Hz
FIDRES     0.346004 Hz
AQ         1.4451188 sec
RG         8192
DW         22.050 usec
DE         6.50 usec
TE         673.2 K
D1         2.00000000 sec
D11        0.03000000 sec
TDO        1

===== CHANNEL f1 =====
NUC1       13C
P1         14.00 usec
PL1        2.00 dB
SFO1       75.4752953 MHz

===== CHANNEL f2 =====
CPDPRG2    waltz16
NUC2       1H
PCPD2      90.00 usec
PL2        2.00 dB
PL12       20.00 dB
PL13       20.00 dB
SFO2       300.1312005 MHz
SI         32768
SF         75.4677490 MHz
WDW        EM
SSB        0
LB         1.00 Hz
GB         0
PC         1.40

```

Sample:

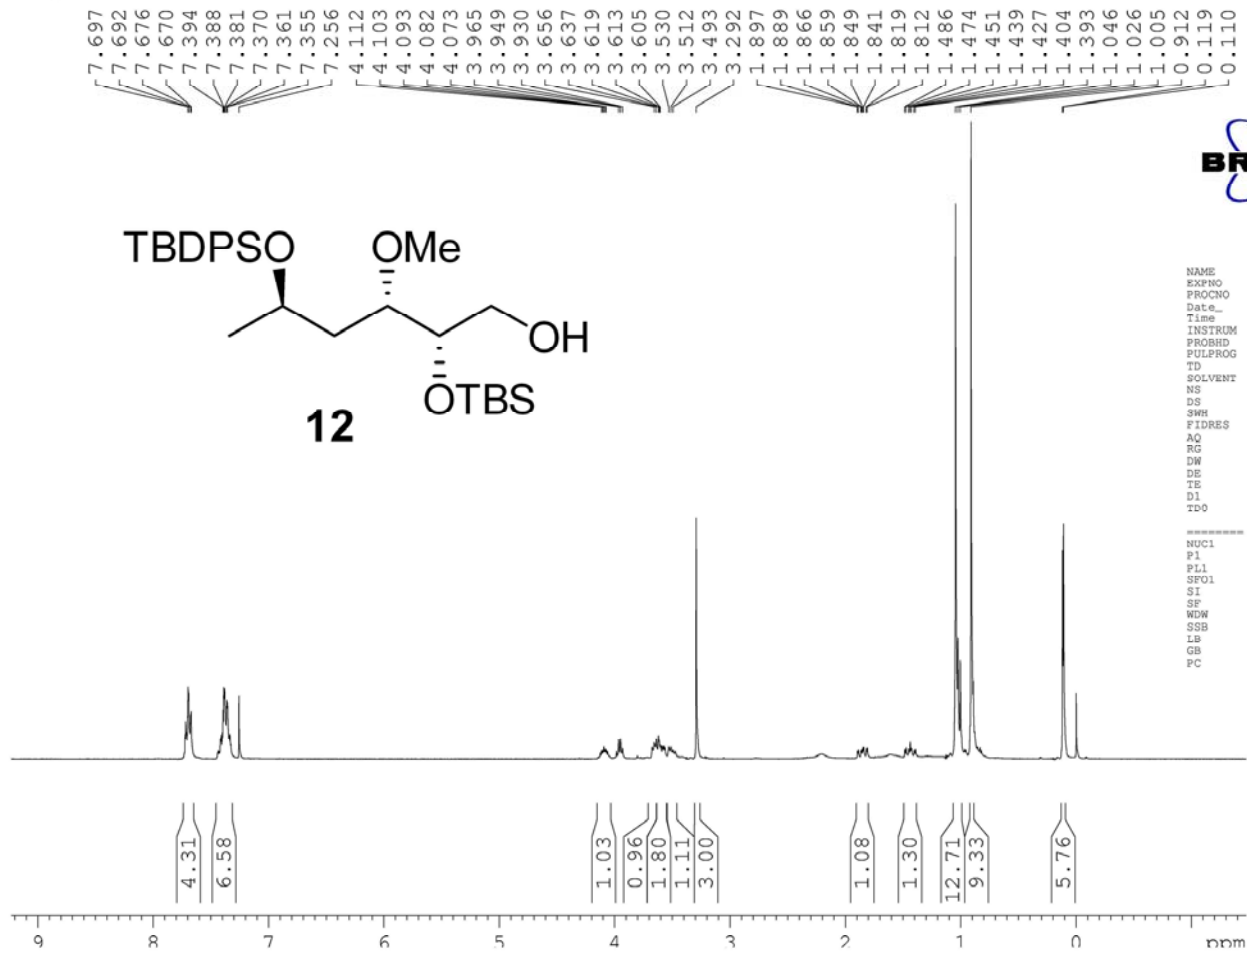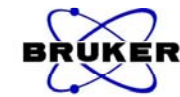

```

NAME      SJ201205242
EXPNO     1
PROCNO    1
Date_     20120528
Time      10.42
INSTRUM    spect
PROBHD     5 mm QNP 1H/13
PULPROG    zg30
TD          65536
SOLVENT    CDCl3
NS          16
DS          2
SWH         6172.839 Hz
FIDRES      0.094190 Hz
AQ          5.3084660 sec
RG          362
DW          81.000 usec
DE          6.50 usec
TE          273.2 K
D1          1.00000000 sec
TD0         1
===== CHANNEL f1 =====
NUC1        1H
P1          10.80 usec
PL1         1.00 dB
SFO1        300.1314534 MHz
SI          32768
SF          300.1300078 MHz
WDW         EM
SSB         0
LB          0.30 Hz
GB          0
PC          1.00
  
```

Chemical structure of compound **12** is shown above the spectrum. The structure is a 1,3-diol derivative with a TBDPSO group, a methoxy group, and a TBS group.

**13C NMR Spectrum (CDCl<sub>3</sub>):**

- Chemical shifts (ppm): 135.9, 135.0, 134.2, 129.6, 129.4, 127.5, 127.3, 80.1, 77.3, 77.0, 76.8, 70.5, 66.7, 63.4, 58.1, 39.4, 27.1, 25.8, 24.7, 19.3, 18.1, -4.7, -4.7.

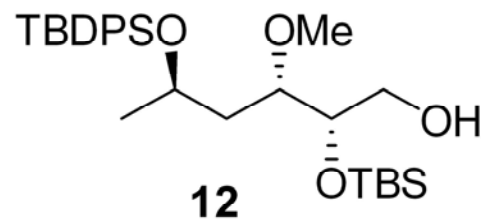

```

NAME                SJ20121224B
EXPNO                2
PROCNO              1
Date_               20130109
Time                10.27
INSTRUM              spect
PROBHD               5 mm PABBO BB
PULPROG              zgpg30
TD                  65536
SOLVENT              CDCl3
NS                   40
DS                   2
SWH                  45454.547 Hz
FIDRES              0.693581 Hz
AQ                  0.1209570 sec
RG                  26000
DE                  11.000 usec
DW                  6.50 usec
TE                  294.3 K
D1                  2.00000000 sec
d11                 0.03000000 sec
TD0                 1
===== CHANNEL f1 =====
NUC1                 13C
P1                   6.00 usec
PL1                  1.00 dB
P1LW                 83.2024383 W
SFO1                 150.9178993 MHz
===== CHANNEL f2 =====
CPDPRG2             waltz16
NUC2                 1H
PCPD2               -8.00 usec
PL2                 -4.00 dB
PL12                 13.16 dB
PL13                 16.00 dB
PL2W                34.70265579 W
PL12W               0.66736388 W
PL13W               0.3702653 W
SW2                 600.1324005 MHz
SI                   32768
SF                  150.9028090 MHz
SS                   EM
SSB                 0
LB                  3.00 Hz
GB                  0
PC                   1.40

```

Figure 1 consists of two dendrograms. The left dendrogram, labeled 'number', shows a hierarchical clustering of 12 variables. The variables are grouped into clusters, with the final cluster containing all 12 variables. The root of the dendrogram is at 1.699. The right dendrogram, labeled 'weight', shows a hierarchical clustering of the same 12 variables. The root of this dendrogram is at 1.500. Both dendrograms show a similar pattern of clustering, with variables being grouped into smaller clusters before being merged into larger ones.

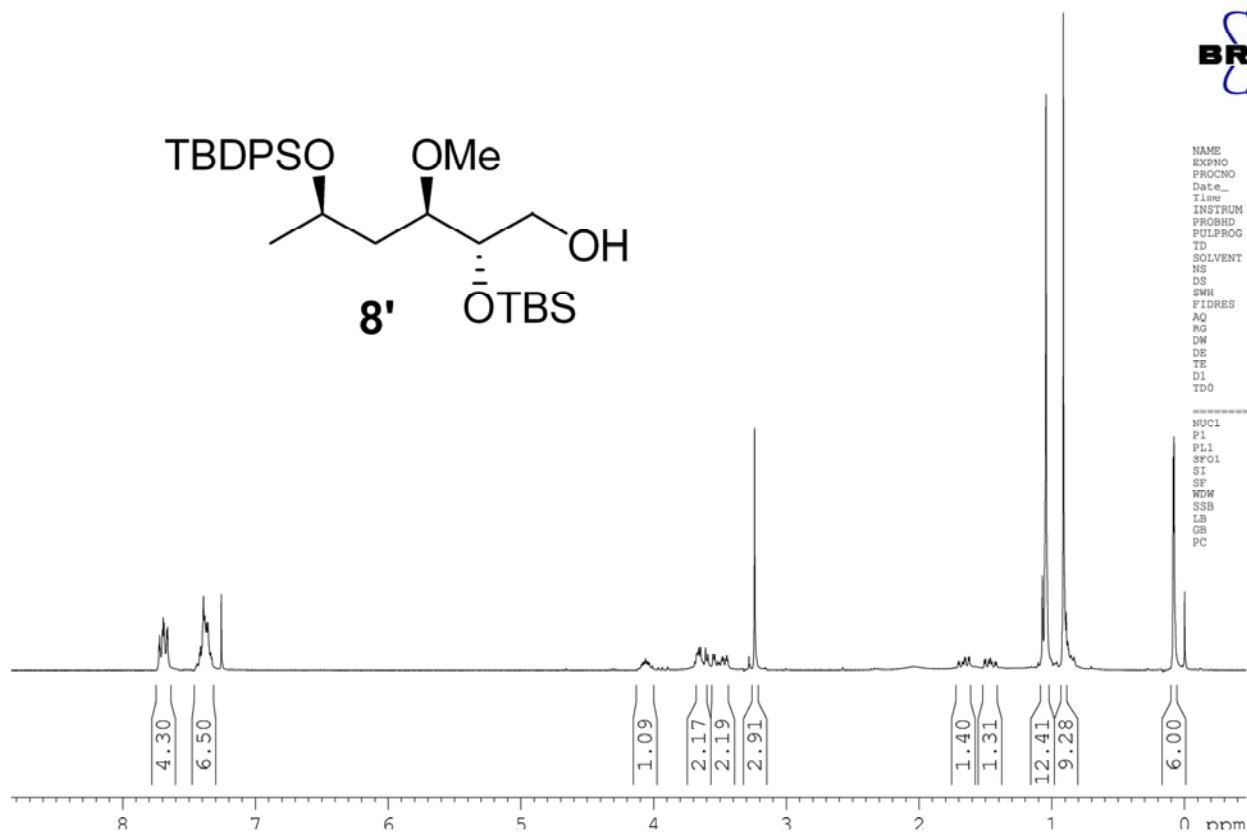

```
NAME          SJ201205241
EXPNO         1
PROCNO        1
Date_         20120528
Time          10.47
INSTRUM       spect
PROBHD        5 mm QNP 1H/13
PULPROG       zgpg30
TD            65536
SOLVENT       CDCl3
NS            16
DS            2
SWH           6172.829 Hz
FIDRES        0.094910 Hz
AQ            5.3084660 sec
RG            362
DW            81.000 usec
DE            6.50 usec
TE            673.2 K
D1            1.0000000 sec
TD0
```

```

    000 000 000 000 000 000 000 000 000 000 000 000 000 000 000 000
CHANNEL f1
NUC1                      1H
P1                        10.80 usec
PL1                       1.00 dB
SFO1                      300.1318334 MHz
SI                        32768
SF                        300.1300074 MHz
WDW                        EM
SSB                        0
LB                        0.30 Hz
GB                        0
PC                        1.00

```

AV-600-13C  
Sample:

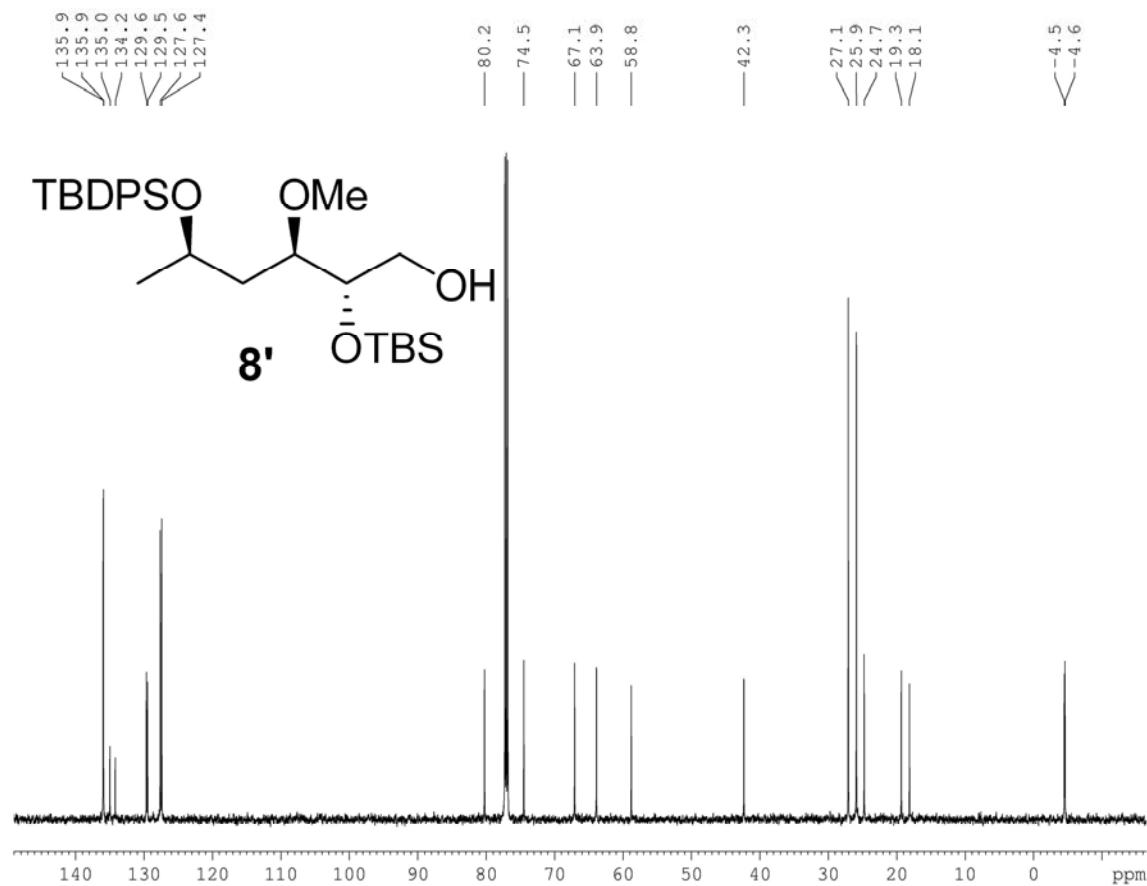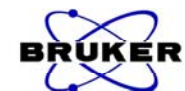

```

NAME      SJ20121224A
EXPNO     2
PROCNO    1
Date_     20130109
Time      10.23
INSTRUM   spect
PROBHD    5 mm PABBO BB-
PULPROG   zgpg30
TD         65536
SOLVENT   CDCl3
NS         129
DS         2
SWH        45454.547 Hz
FIDRES     0.693581 Hz
AQ         0.7209570 sec
RG         20600
DW         11.000 usec
DE         6.50 usec
TE         294.9 K
D1         2.00000000 sec
D11        0.03000000 sec
TD0        1

===== CHANNEL f1 =====
NUC1       13C
P1         6.00 usec
PL1        1.00 dB
PL1W       83.20243835 W
SFO1       150.9178993 MHz

===== CHANNEL f2 =====
CPDPRG2    waltz16
NUC2       1H
PCPD2      80.00 usec
PL2        -4.00 dB
PL12       13.16 dB
PL13       16.00 dB
PL2W       34.70265579 W
PL12W      0.66736388 W
PL13W      0.34702653 W
SFO2       600.1324005 MHz
SI         32768
SF         150.9028090 MHz
WDW        EM
SSB        0
LB         3.00 Hz
GB         0
PC         1.40
  
```

Sample:

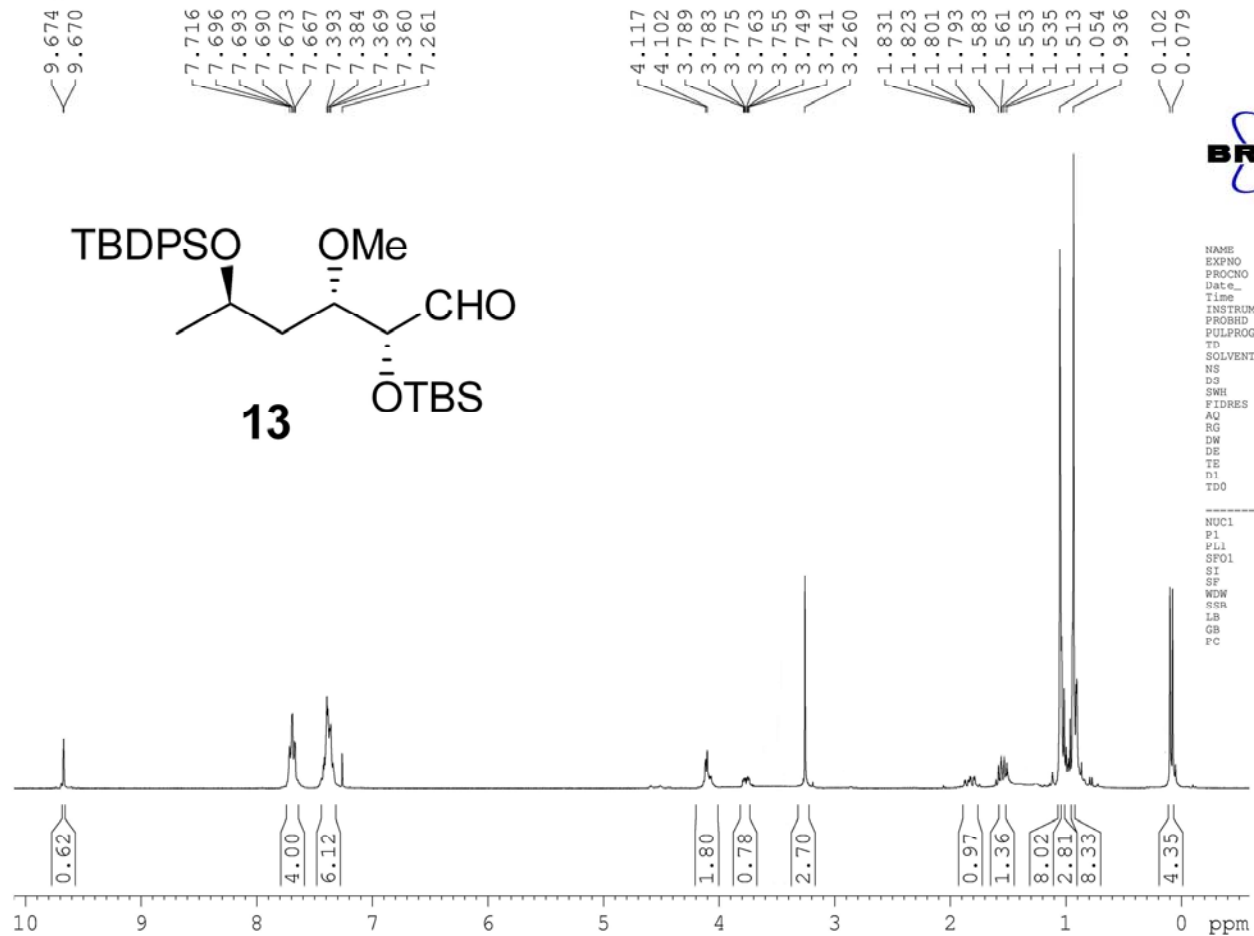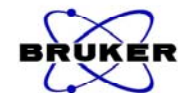

```

NAME      SJ20121129A
EXPNO     1
PROCNO    1
Date_     20121129
Time      14.45
INSTRUM   spect
PROBHD    5 mm QNP 1H/13
PULPROG   zg30
TD        65536
SOLVENT   CDCl3
NS         16
DS         2
SWH        6172.839 Hz
FIDRES     0.094190 Hz
AQ         5.3084660 sec
RG         256
DW         81.000 usec
DE         6.50 usec
TE         273.2 K
D1         1.00000000 sec
TD0        1

===== CHANNEL f1 =====
NUC1       1H
P1         10.80 usec
PL1        0.00 dB
SFO1       300.1318534 MHz
SI         32768
SF         300.1300053 MHz
WDW        EM
SSB        0
LB         0.30 Hz
GB         0
PC         1.00
  
```



AV-600-13C  
 Sample: SJ20121112

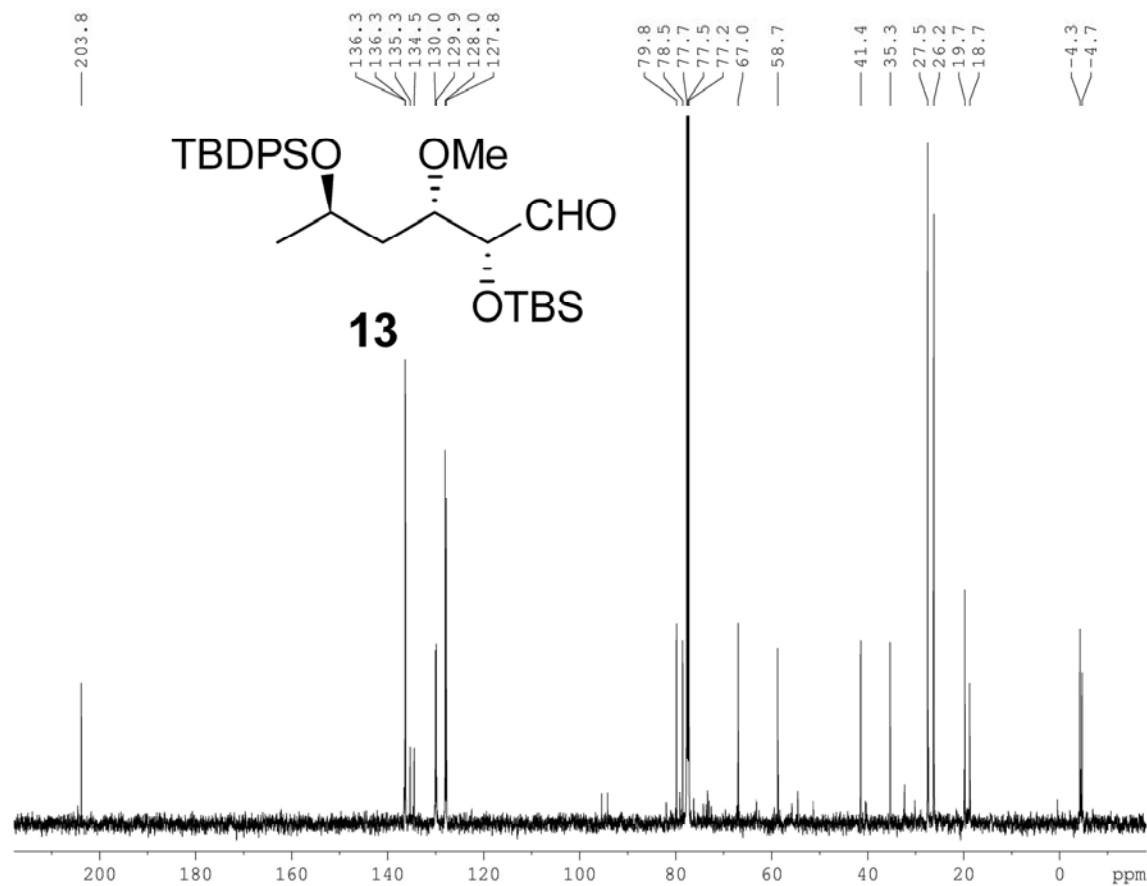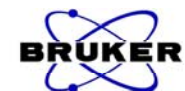

```

NAME      SJ20121129A
EXPNO     2
PROCNO    1
Date_     20121203
Time      8.49
INSTRUM   spect
PROBHD    5 mm PABBO BB-
PULPROG   zgpg30
TD        65536
SOLVENT   CDCl3
NS        338
DS        2
SWH       45454.547 Hz
FIDRES    0.693581 Hz
AQ        0.7209570 sec
RG        20600
DW        11.000 usec
DE        6.50 usec
TE        293.0 K
D1        2.00000000 sec
D11       0.03000000 sec
TD0       1

===== CHANNEL f1 =====
NUC1      13C
P1        6.00 usec
PL1       1.00 dB
PL1W      83.20243835 W
SF01      150.9178993 MHz

===== CHANNEL f2 =====
CPDPRG2   waltz16
NUC2      1H
PCPD2     80.00 usec
PL2       -4.00 dB
PL12      13.16 dB
PL13      16.00 dB
PL2W      34.70265579 W
PL12W     0.66736388 W
PL13W     0.34702653 W
SFO2      600.1324005 MHz
SI        32768
SF        150.9027469 MHz
WDW       EM
SSB       0
LB        3.00 Hz
GB        0
PC        1.40
  
```

Sample:

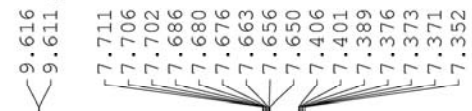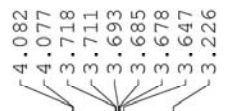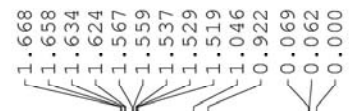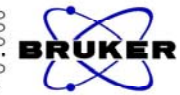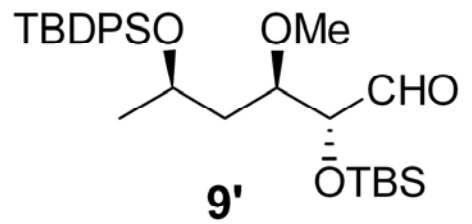

```

NAME          SJ20120904
EXPNO         1
PROCNO        1
Date_         20120904
Time          15.13
INSTRUM       spect
PROBHD        5 mm QNP 1H/13
PULPROG       zg30
TD            65536
SOLVENT       CDCl3
NS            16
DS            2
SWH           6172.839 Hz
FIDRES        0.094190 Hz
AQ            5.3084660 sec
RG            228.1
DW            81.000 usec
DE            6.50 usec
TE            673.2 K
D1            1.00000000 sec
TD0           1

===== CHANNEL f1 =====
NUC1          1H
P1            10.80 usec
PL1           1.00 dB
SFO1          300.1318534 MHz
SI            32768
SF            300.1300087 MHz
WDW           EM
SSB           0
LB            0.30 Hz
GB            0
PC            1.00
  
```

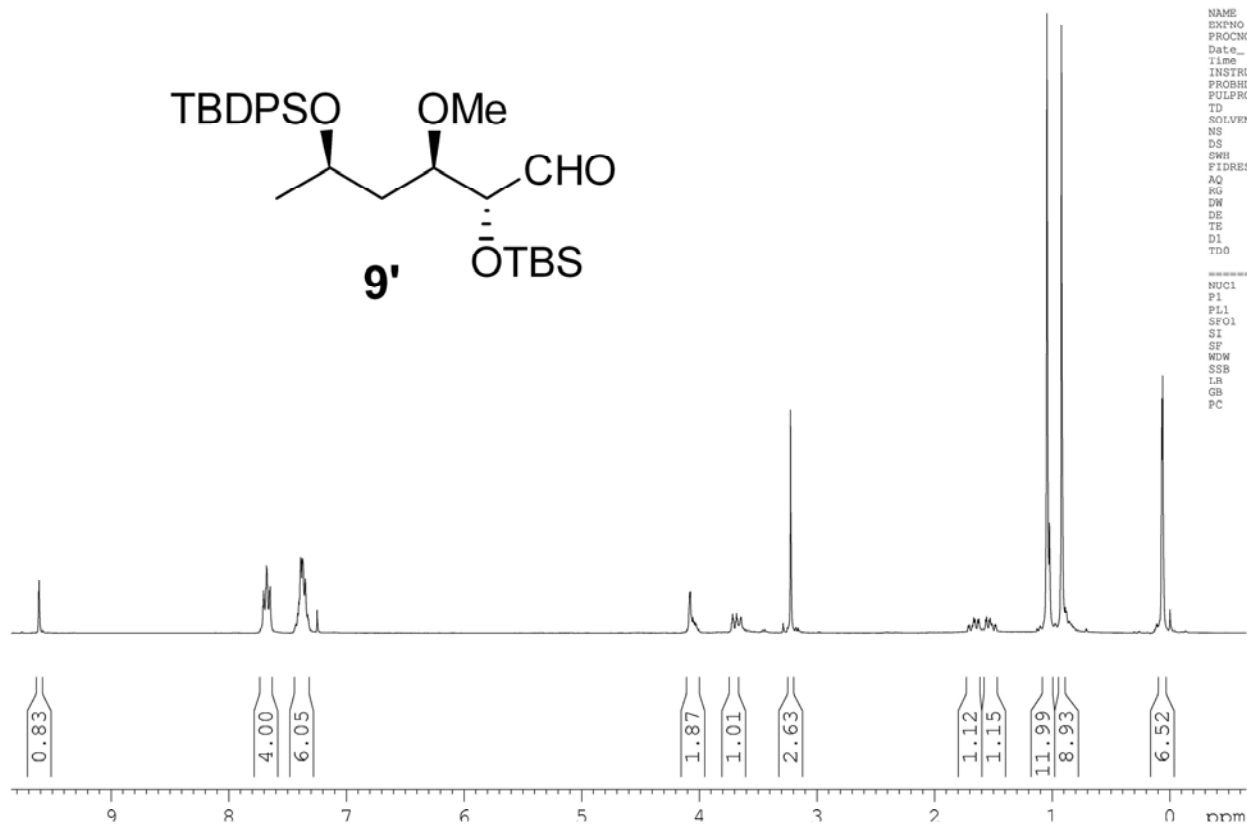

AV-300-13C  
Sample:

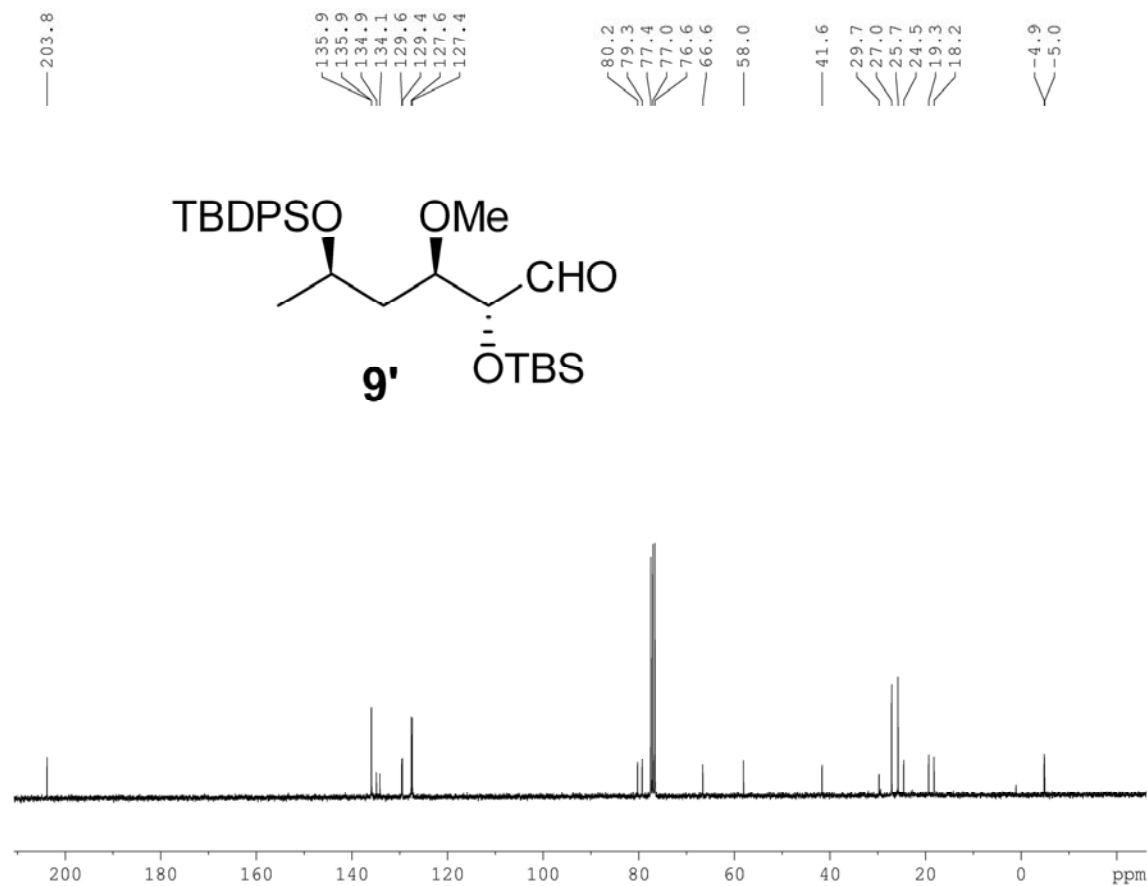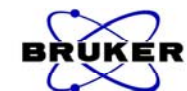

```

NAME      SJ20120904
EXPNO     2
PROCNO    1
Date_     20120904
Time      17.42
INSTRUM   spect
PROBHD    5 mm QNP 1H/13
PULPROG   zgpg30
TD         65536
SOLVENT   CDCl3
NS         720
DS         4
SWH        22675.736 Hz
FIDRES     0.346004 Hz
AQ         1.4451188 sec
RG         2896.3
DW         22.050 usec
DE         6.50 usec
TE         673.2 K
D1         2.00000000 sec
D11        0.03000000 sec
TD0        1

===== CHANNEL f1 =====
NUC1       13C
P1         14.00 usec
PL1        2.00 dB
SFO1       75.4752953 MHz

===== CHANNEL f2 =====
CPDPRG2    waltz16
NUC2       1H
PCPD2      90.00 usec
PL2        2.00 dB
PL12       20.00 dB
PL13       20.00 dB
SFO2       300.1312005 MHz
SI         32768
SF         75.4677490 MHz
WDW        EM
SSB        0
LB         1.00 Hz
GB         0
PC         1.40
  
```

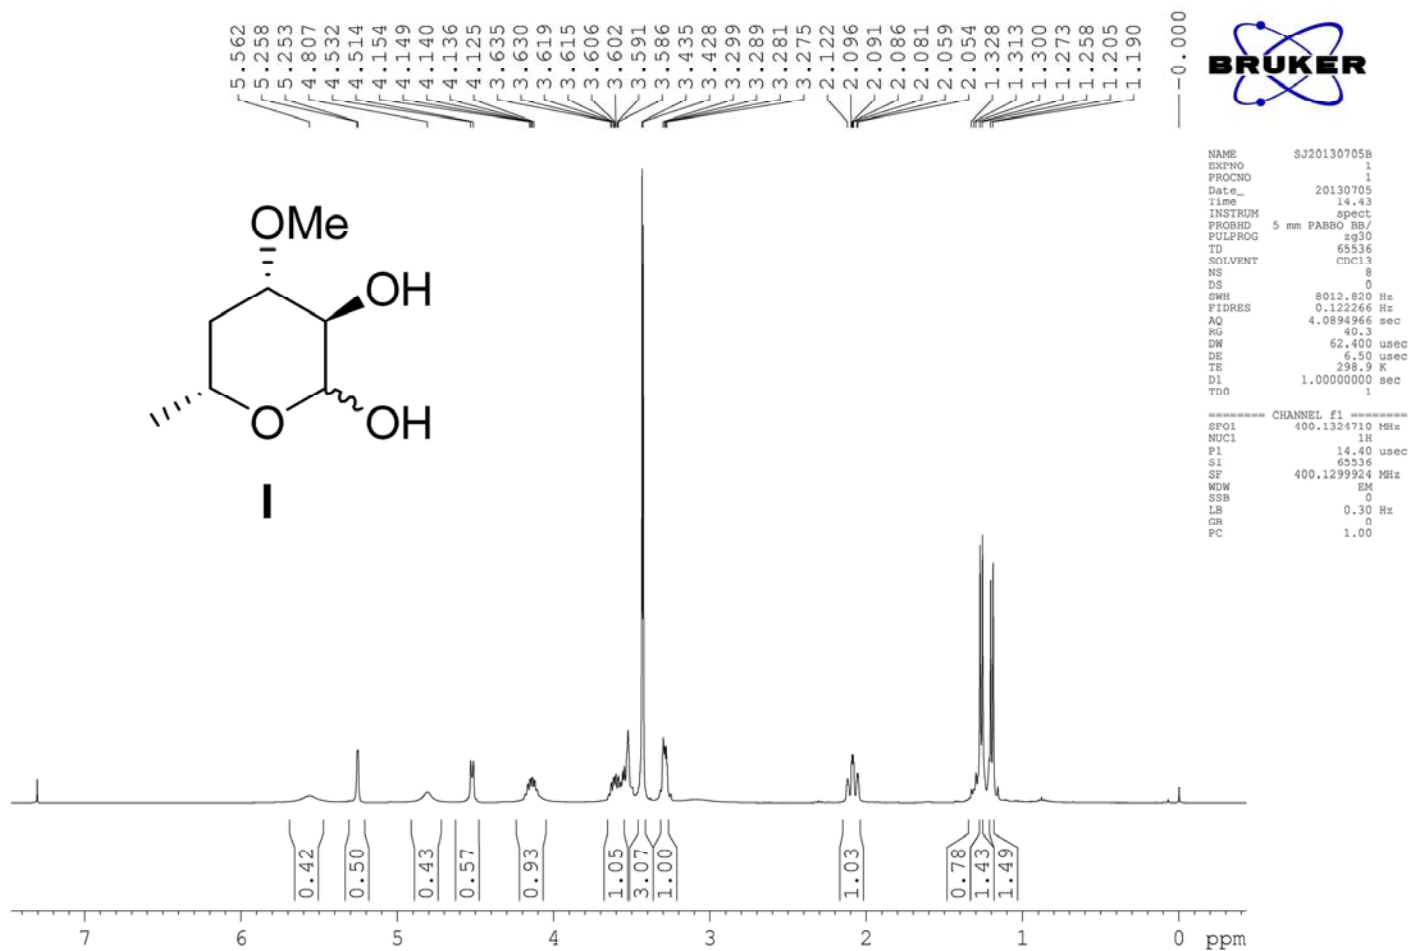

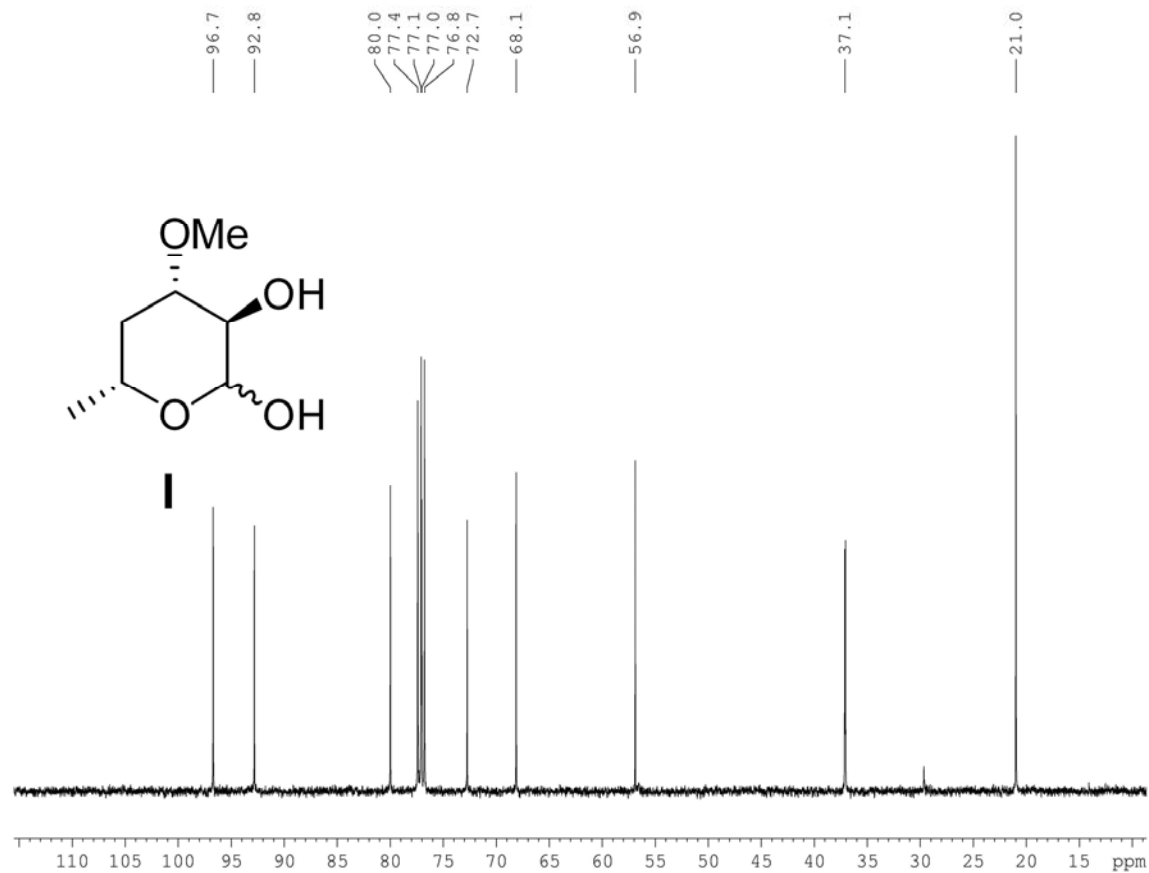

```

NAME      SJ20130705B
EXPNO     2
PROCNO    1
Date_     20130705
Time      16.20
INSTRUM   spect
PROBHD    5 mm PABBO BB/
PULPROG   zgpg30
TD        65536
SOLVENT   CDCl3
NS        118
DS        4
SWH       29761.904 Hz
FIDRES    0.454131 Hz
AQ        1.1010548 sec
RG        203
DW        16.800 usec
DE        6.50 usec
TE        299.9 K
D1        2.00000000 sec
D11       0.03000000 sec
TD0       1000000

===== CHANNEL f1 =====
SF01      100.6228293 MHz
NUC1       13C
P1        9.40 usec
ST        32768
SF        100.6127690 MHz
WDW       EM
SSB       0
LB        1.00 Hz
GB        0
PC        1.40

```

Sample:

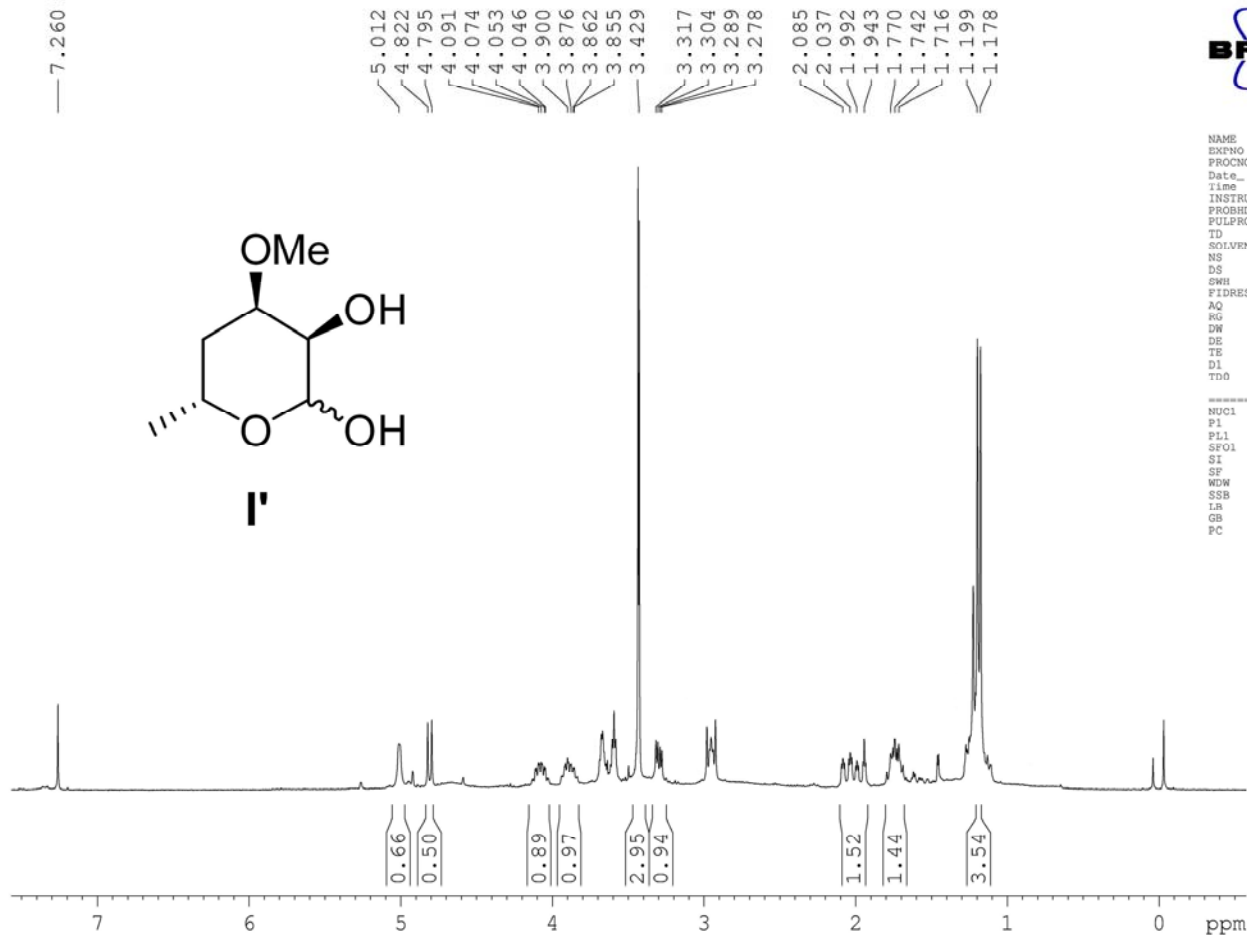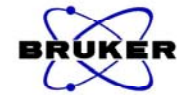

```

NAME          SJ20121130B
EXPNO         1
PROCNO        1
Date_         20121203
Time          9.04
INSTRUM       spect
PROBHD        5 mm QNP 1H/13
PULPROG       zg30
TD            65536
SOLVENT       CDCl3
NS            16
DS            2
SWH           6172.839 Hz
FIDRES        0.094190 Hz
AQ            5.3084660 sec
RG            512
DW            81.000 usec
DE            6.50 usec
TE            673.2 K
D1            1.00000000 sec
TD0           1

===== CHANNEL f1 =====
NUC1          1H
P1            10.80 usec
PL1           1.00 dB
SFO1          300.1318534 MHz
SI            32768
SF            300.1300052 MHz
WDW           EM
SSB           0
LB            0.30 Hz
GB            0
PC            1.00
  
```

AV-600-13C  
 Sample: SJ20121113

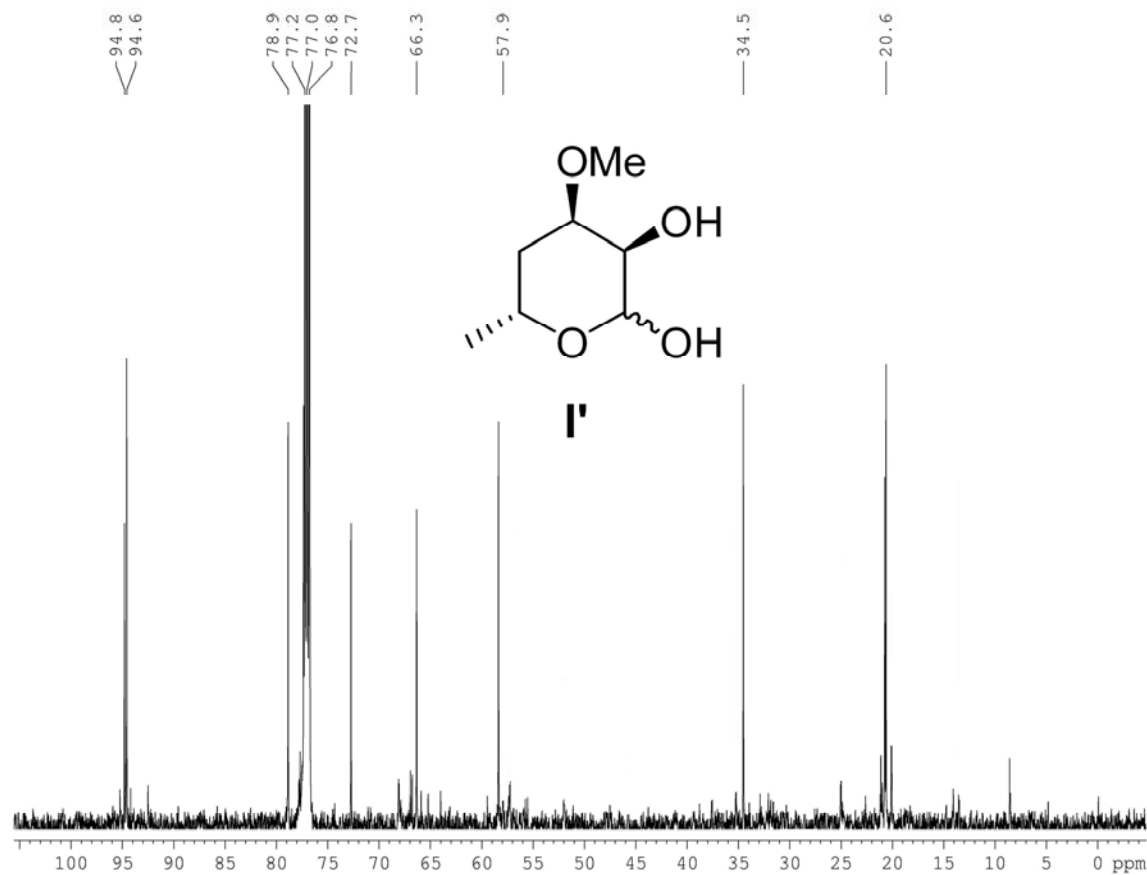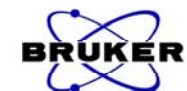

NAME SJ20121130B  
 EXPNO 2  
 PROCNO 1  
 Date\_ 20121204  
 Time 10.37  
 INSTRUM spect  
 PROBHD 5 mm PABBO BB-  
 PULPROG zgpg30  
 TD 65536  
 SOLVENT CDCl3  
 NS 486  
 DS 2  
 SWH 45454.547 Hz  
 FIDRES 0.693581 Hz  
 AQ 0.7209570 sec  
 RG 20600  
 DW 11.000 usec  
 DE 6.50 usec  
 TE 292.0 K  
 D1 2.00000000 sec  
 D11 0.03000000 sec  
 TD0 1

===== CHANNEL f1 =====  
 NUC1 13C  
 P1 6.00 usec  
 PL1 1.00 dB  
 PL1W 83.20243835 W  
 SFO1 150.9178993 MHz

===== CHANNEL f2 =====  
 CPDPRG2 waltz16  
 NUC2 1H  
 PCPD2 80.00 usec  
 PL2 -4.00 dB  
 PL12 13.16 dB  
 PL13 16.00 dB  
 PL2W 34.70265579 W  
 PL12W 0.66736388 W  
 PL13W 0.34702653 W  
 SFO2 600.1324005 MHz  
 SI 32768  
 SF 150.9028204 MHz  
 WDW EM  
 SSB 0  
 LB 3.00 Hz  
 GB 0  
 PC 1.40

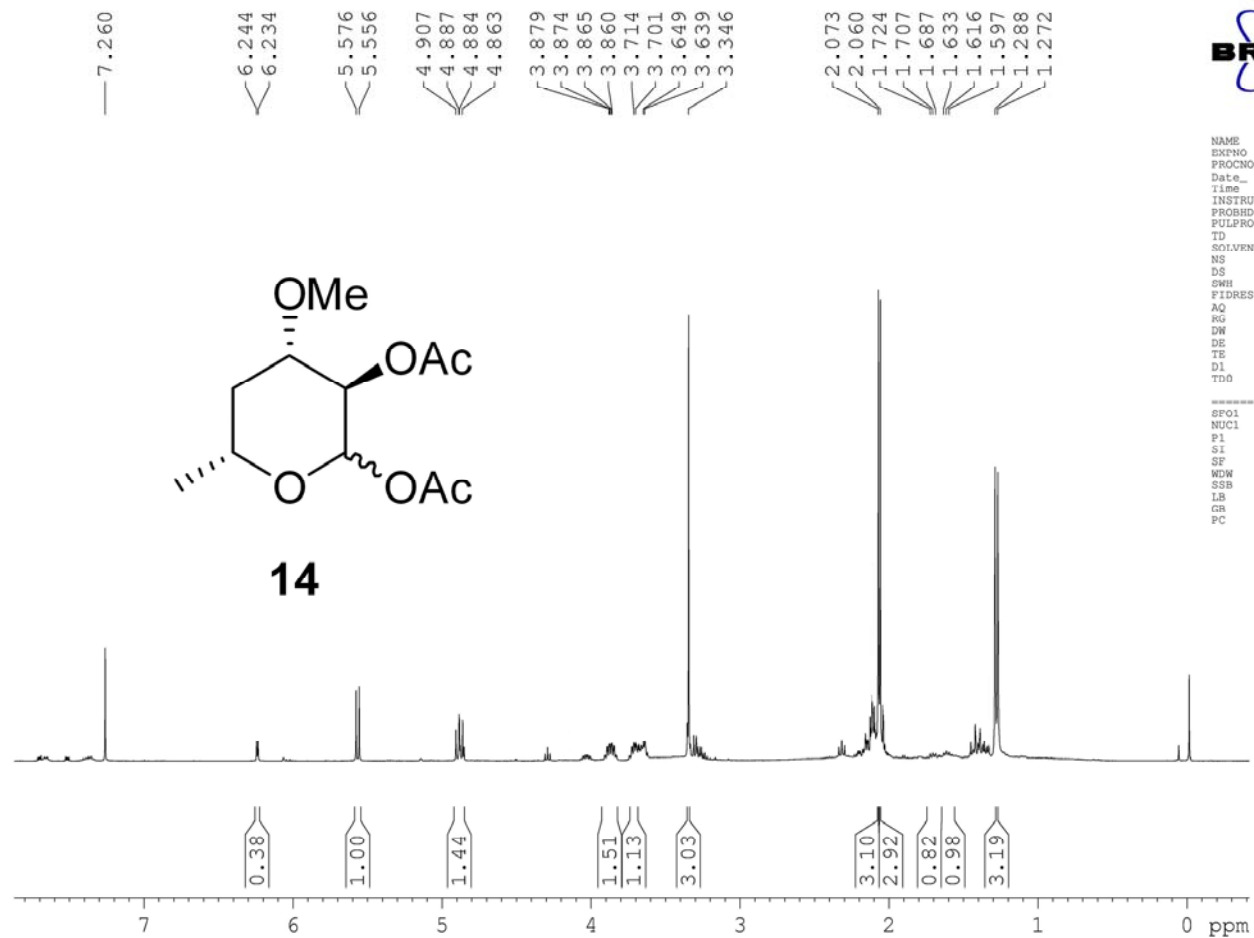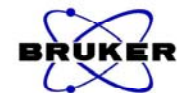

```

NAME          SJ20130601A
EXPNO         1
PROCNO        1
Date_         20130608
Time          10.34
INSTRUM       spect
PROBHD        5 mm PABBO BB/
PULPROG       zg30
TD            65536
SOLVENT       CDCl3
NS            8
DS            0
SWH           8012.820 Hz
FIDRES       0.122266 Hz
AQ           4.0894966 sec
RG            71.8
DW           62.400 usec
DE           6.30 usec
TE           300.3 K
D1           1.00000000 sec
TD0           1
===== CHANNEL f1 =====
SFO1         400.1324710 MHz
NUC1          1H
P1           14.40 usec
SI           65536
SF           400.1300096 MHz
WDW           EM
SSB           0
LB           0.30 Hz
GB           0
PC           1.00
  
```



SJ20130601A  
2013-06-13

169.8  
169.6

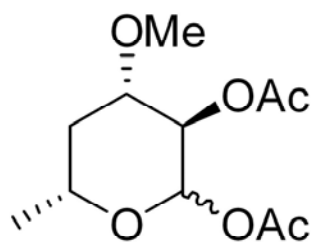

14

99.9  
92.5  
78.2  
77.6  
77.3  
77.0  
76.8  
69.1  
55.2  
37.1  
29.7  
21.0  
20.8

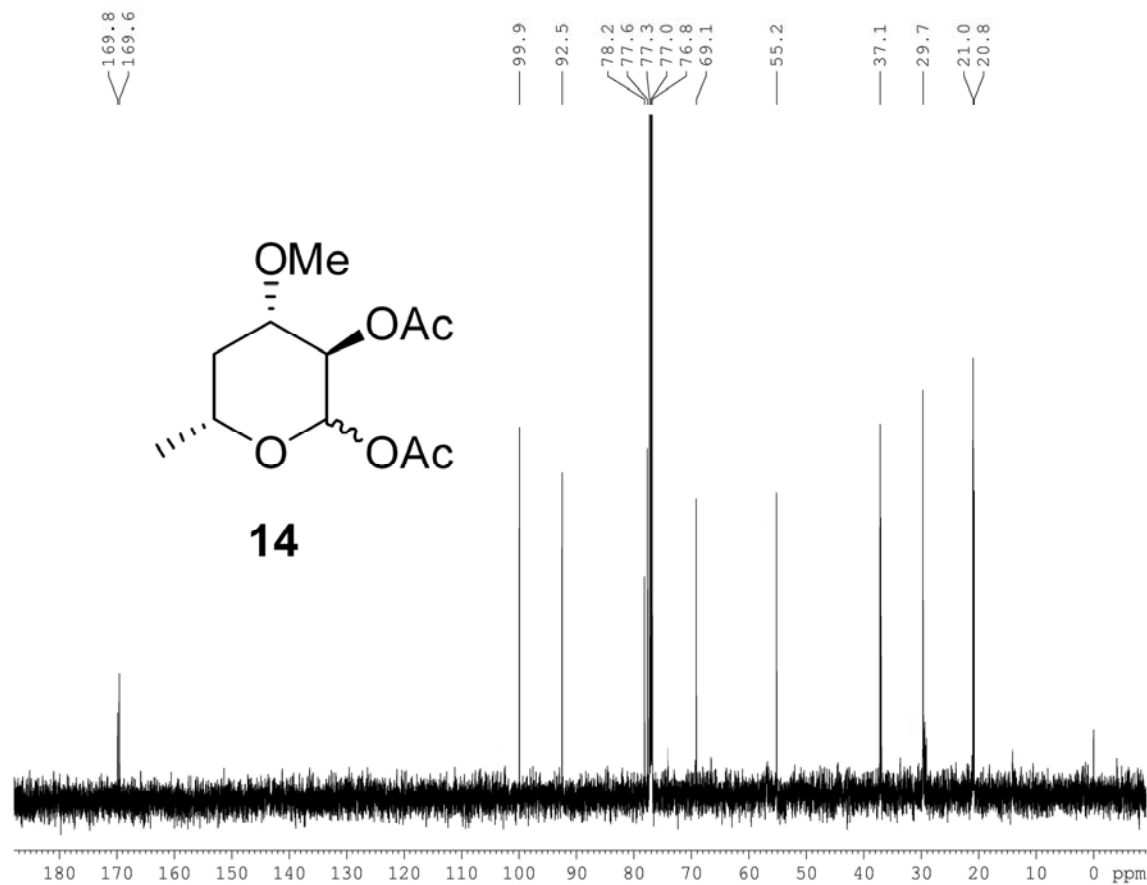

NAME SJ20130601A  
EXPNO 2  
PROCNO 1  
Date\_ 20130613  
Time 12.18  
INSTRUM spect  
PROBHD 5 mm PABBO BB-  
PULPROG zgpg30  
TD 65536  
SOLVENT CDCl3  
NS 115  
DS 4  
SWH 36057.691 Hz  
FIDRES 0.550197 Hz  
AQ 0.9088159 sec  
RG 174.88  
DW 13.867 usec  
DE 6.50 usec  
TE 298.1 K  
D1 2.00000000 sec  
D11 0.03000000 sec

===== CHANNEL f1 =====  
NUC1 13C  
P1 11.55 usec  
S1 32768  
SF 150.9028090 MHz  
WDW EM  
SSB 0  
LB 1.00 Hz  
GB 0  
PC 1.40

Sample:

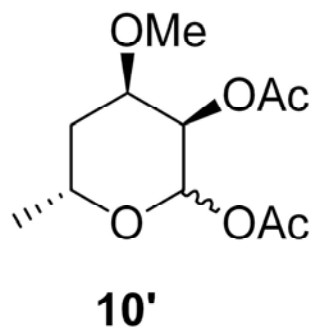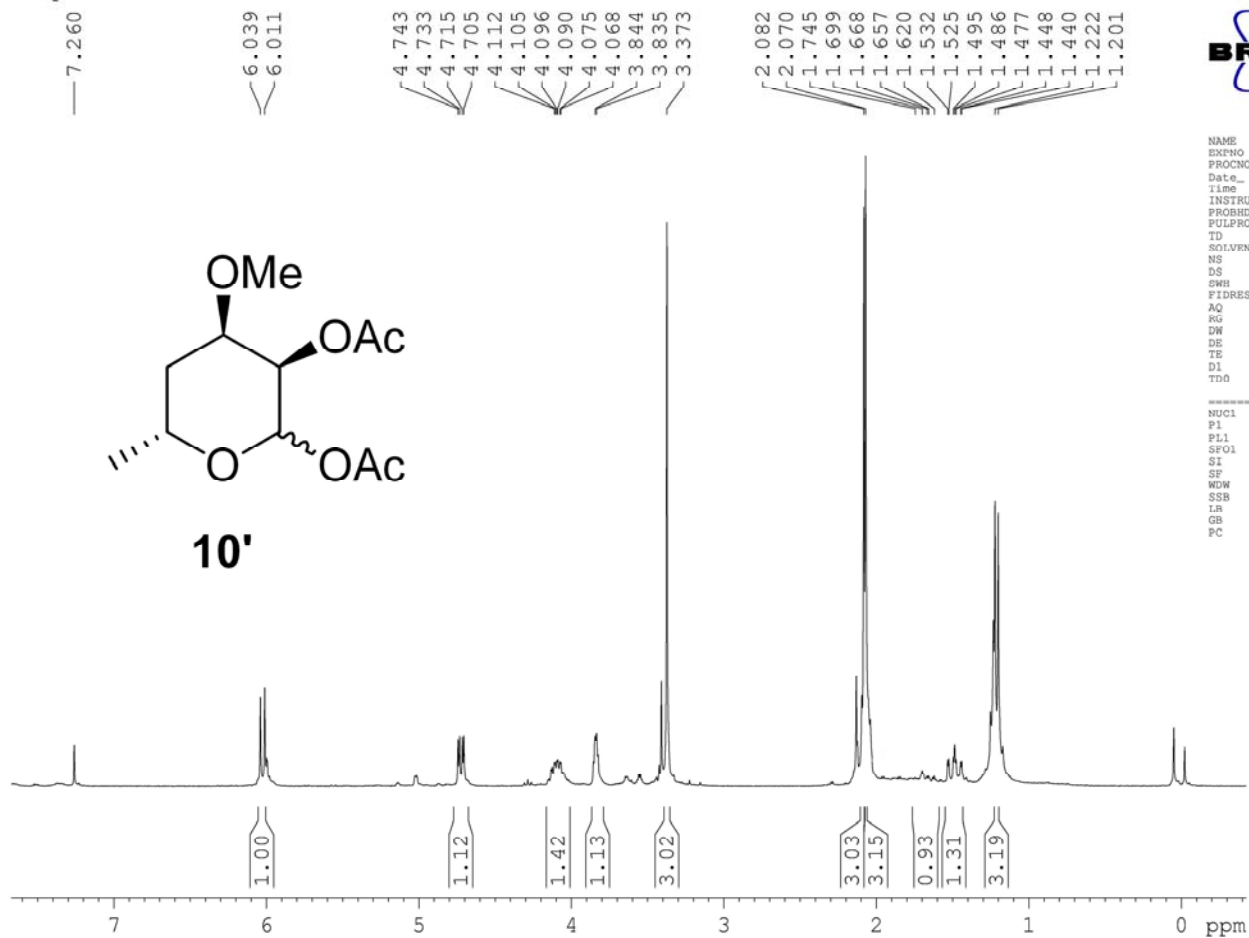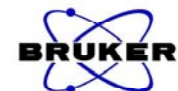

```

NAME          SJ20130417
EXPNO         1
PROCNO        1
Date_         20130418
Time          11.45
INSTRUM       spect
PROBHD        5 mm QNP 1H/13
PULPROG       zg30
TD            65536
SOLVENT       CDCl3
NS            16
DS            2
SWH           6172.839 Hz
FIDRES        0.094190 Hz
AQ            5.3084660 sec
RG            512
DW            81.000 usec
DE            6.50 usec
TE            673.2 K
D1            1.00000000 sec
TD0           1
===== CHANNEL f1 =====
NUC1          1H
P1            10.80 usec
PL1           1.00 dB
SFO1          300.1318534 MHz
SI            32768
SF            300.1300053 MHz
WDW           EM
SSB           0
LB            0.30 Hz
GB            0
PC            1.00
  
```

SJ20130417 i  
2013-06-13



170.2  
169.3

90.5  
77.3  
77.0  
76.8  
75.2  
72.1  
67.6  
58.0

35.8

21.0  
21.0  
20.6

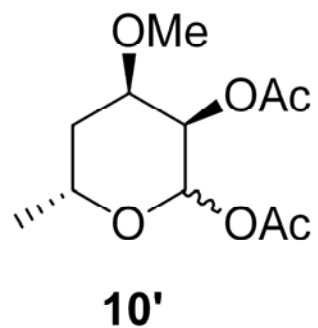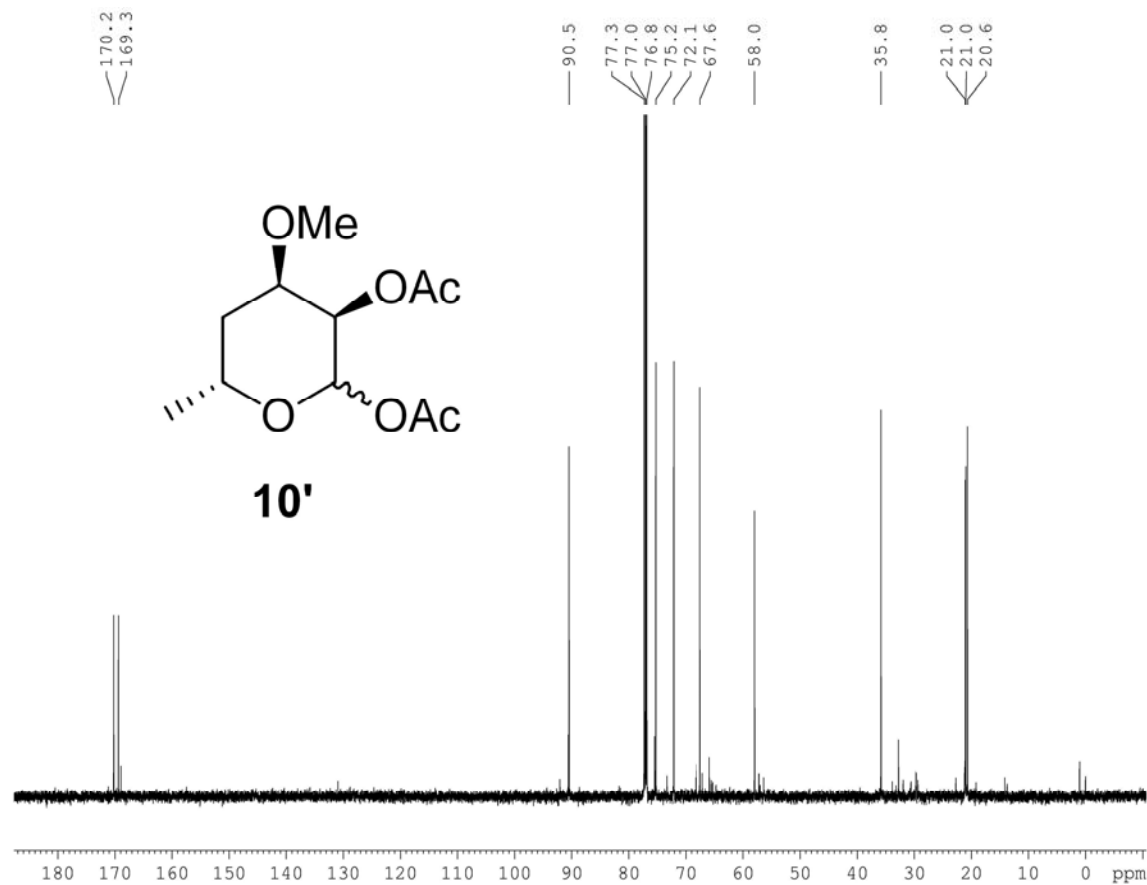

```

NAME      SJ20130417
EXPNO     2
PROCNO    1
Date_     20130613
Time      11.56
INSTRUM   spect
PROBHD    5 mm PABBO BB-
PULPROG   zgpg30
TD         65536
SOLVENT   CDCl3
NS         160
DS         4
SWH        36057.691 Hz
FIDRES     0.550197 Hz
AQ         0.9088159 sec
RG         174.88
DW         13.867 usec
DE         6.50 usec
TE         297.9 K
D1         2.0000000 sec
D11        0.03000000 sec

===== CHANNEL f1 =====
NUC1       13C
P1         11.55 usec
S1         32768
SF         150.9028090 MHz
WDW        EM
SSB        0
LB         1.00 Hz
GB         0
PC         1.40

```
